# Supplementary material for: Strong vibrational coupling in room temperature plasmonic resonators
Source: Nat Commun. 2019 Apr 4;10:1527. doi: 10.1038/s41467-019-09594-z (PMC6449381; doi:10.1038/s41467-019-09594-z)
Supplement: Supplementary file 3 — Source data [file 41467_2019_9594_MOESM3_ESM.xlsx]

## Sheet: Figure 1
	Figure 1b						Figure 1b inset				Figure 1c				Figure 1e						Figure 1e inset				Figure 1f
	Delay (ps)	Signal (mV)	Delay (ps)	Signal (mV)			Delay (ps)	Signal (mV)			Frequency (GHz)	FFT intensity			Delay (ps)	Signal (mV)	Delay (ps)	Signal (mV)			Delay (ps)	Signal (mV)			Frequency (GHz)	FFT intensity
	-5	0.0035	7	5.008			7	-0.000940118			0	0.02151			-8	-7.0784	12	5.92267			15	0.94438			0	3.09401
	-4	0.0035	8.17267	4.15773			8	0.00717			0.8547	3.29723			-7	-7.1136	13.0721	5.01178			18	-0.05071			0.93633	46.9886
	-3	-0.0368	9.34535	3.8928			9	-0.01163			1.7094	2.78956			-6	-7.0784	14.1441	4.80246			21	-0.90878			1.87266	40.3117
	-2	-0.0301	10.518	3.84091			10	-0.01611			2.5641	2.53997			-5	-6.9877	15.2162	4.67479			24	-1.14684			2.80899	23.1534
	-1	0.0068	11.6907	3.86659			11	0.02948			3.4188	0.63148			-4	-6.9575	16.2883	4.45334			27	-0.38888			3.74532	22.2504
	0	-0.0133	12.8634	3.91886			13.5	0.0582			4.2735	1.25936			-3	-6.9424	17.3604	4.11386			30	0.50509			4.68165	15.3522
	1	1.7793	14.036	3.97698			16	0.06116			5.12821	0.39972			-2	-7.1489	18.4324	3.6918			33	0.24709			5.61798	9.3391
	2	14.224	15.2087	4.03122			18.5	0.10091			5.98291	2.15995			-1	-6.9676	19.5045	3.24813			36	-0.6469			6.55431	5.38858
	3	27.749	16.3814	4.07612			21	0.21113			6.83761	1.22218			0	-6.8065	20.5766	2.85094			39	-1.58987			7.49064	12.2593
	4	22.948	17.5541	4.10823			23.5	0.37493			7.69231	2.28166			1	-0.039	21.6486	2.5617			42	-1.10883			8.42697	8.63833
	5	13.398	18.7267	4.12532			26	0.25351			8.54701	0.30273			2	46.448	22.7207	2.42436			45	0.02224			9.3633	7.2843
	6	7.5969	19.8994	4.12625			28.5	0.06148			9.40171	1.90146			3	52.395	23.7928	2.45794			48	0.24632			10.2996	4.23269
	7	5.0188	21.0721	4.11082			31	-0.05327			10.2564	2.20588			6	35.174	24.8649	2.65335			51	-0.46058			11.236	3.79986
	8	4.193	22.2447	4.07981			33.5	-0.19493			11.1111	0.58148			9	18.204	25.9369	2.97497			54	-1.37846			12.1723	4.66293
	9	3.9479	23.4174	4.03488			36	-0.26611			11.9658	0.68778			12	5.923	27.009	3.36651			57	-1.41533			13.1086	3.48109
	10	3.8807	24.5901	3.97847			38.5	-0.2064			12.8205	2.54672			15	4.715	28.0811	3.7604			60	-0.60718			14.0449	3.20604
	11	3.9076	25.7628	3.91368			41	-0.12662			13.6752	0.86507			18	3.717	29.1532	4.08895			63	0.343			14.9813	4.99753
	13.5	3.9244	26.9354	3.84405			43.5	0.00696			14.5299	1.82352			21	2.856	30.2252	4.29549			66	0.23518			15.9176	4.32627
	16	3.921	28.1081	3.7734			46	0.11691			15.3846	1.98875			24	2.615	31.2973	4.34373			69	-0.87961			16.8539	3.92577
	18.5	3.9546	29.2808	3.70558			48.5	0.16315			16.2393	2.30378			27	3.37	32.3694	4.22372			72	-1.51538			17.7903	0.70443
	21	4.0587	30.4535	3.64426			51	0.16908			17.094	1.78738			30	4.261	33.4414	3.95338			75	-1.02414			18.7266	2.63385
	23.5	4.2164	31.6261	3.59274			53.5	0.18508			17.9487	1.14584			33	4	34.5135	3.57553			78	-0.03887			19.6629	3.70475
	26	4.0889	32.7988	3.55375			56	0.09698			18.8034	1.93394			36	3.103	35.5856	3.15076			81	0.53341			20.5993	0.95715
	28.5	3.8908	33.9715	3.52927			58.5	0.00545			19.6581	0.68206			39	2.157	36.6577	2.74734			84	-0.39929			21.5356	3.36782
	31	3.77	35.1441	3.52049			61	-0.14309			20.5128	1.76524			42	2.635	37.7297	2.43002			87	-1.25697			22.4719	2.52855
	33.5	3.6223	36.3168	3.52768			63.5	-0.26144			21.3675	0.66869			45	3.763	38.8018	2.24923			90	-1.56663			23.4082	3.69023
	36	3.5451	37.4895	3.5502			66	-0.27911			22.2222	0.64235			48	3.984	39.8739	2.2329			93	-0.46527			24.3446	1.19672
	38.5	3.5988	38.6622	3.58657			68.5	-0.2699			23.0769	1.66948			51	3.274	40.946	2.38179			96	0.42411			25.2809	1.27737
	41	3.6726	39.8348	3.6345			71	-0.1231			23.9316	1.78238			54	2.353	42.018	2.66949			99	0.28151			26.2172	1.79755
	43.5	3.8002	41.0075	3.69107			73.5	0.01358			24.7863	0.55706			57	2.313	43.0901	3.04681			102	-0.74707			27.1536	2.56657
	46	3.9042	42.1802	3.75289			76	0.07305			25.641	2.22242			60	3.118	44.1622	3.44992			105	-1.52963			28.0899	2.10061
	48.5	3.9445	43.3528	3.81626			78.5	0.1191			26.4957	0.8201			63	4.065	45.2342	3.81097			108	-0.86118			29.0262	3.16476
	51	3.9445	44.5255	3.87744			81	0.16844			27.3504	2.01058			66	3.954	46.3063	4.06926			111	0.0543			29.9626	3.0466
	53.5	3.9546	45.6982	3.93281			83.5	0.17756			28.2051	1.11755			69	2.836	47.3784	4.18123			114	0.6818			30.8989	2.84774
	56	3.8606	46.8709	3.9791			86	0.15976			29.0598	4.03161			72	2.197	48.4504	4.12766			117	-0.24168			31.8352	2.21478
	58.5	3.7632	48.0435	4.01357			88.5	0.05135			29.9145	2.54187			75	2.685	49.5225	3.91677			120	-1.19915			32.7715	0.90964
	61	3.6088	49.2162	4.03416			91	-0.08737			30.7692	5.50998			78	3.667	50.5946	3.58277			123	-1.25659			33.7079	1.70597
	63.5	3.4846	50.3889	4.0396			93.5	-0.17901			31.6239	10.6305			81	4.236	51.6667	3.18021			126	-0.39701			34.6442	1.22274
	66	3.4611	51.5616	4.0295			96	-0.19017			32.4786	28.0852			84	3.3	52.7387	2.7749			129	0.57859			35.5805	4.24377
	68.5	3.4645	52.7342	4.00434			98.5	-0.24834			33.3333	11.4787			87	2.439	53.8108	2.43302			132	0.28521			36.5168	0.65858
	71	3.6055	53.9069	3.96546			101	-0.14873			34.188	5.93924			90	2.126	54.8829	2.2102			135	-0.73815			37.4532	1.38548
	73.5	3.7364	55.0796	3.91497			103.5	0.00457			35.0427	3.6657			93	3.224	55.9549	2.14235			138	-1.11748			38.3895	0.42416
	76	3.7901	56.2522	3.85563			106	0.11085			35.8974	4.02086			96	4.11	57.027	2.23979			141	-0.7868			39.3258	2.79697
	78.5	3.8304	57.4249	3.79067			108.5	0.22052			36.7521	1.75977			99	3.964	58.0991	2.48555			144	0.3249			40.2622	3.90904
	81	3.874	58.5976	3.72367			111	0.19578			37.6068	0.41115			102	2.932	59.1712	2.83829			147	0.70163			41.1985	0.7655
	83.5	3.8774	59.7703	3.65827			113.5	0.21812			38.4615	1.20873			105	2.146	60.2432	3.23913			150	-0.21162			42.1348	1.07475
	86	3.8539	60.9429	3.59803			116	0.18004			39.3162	1.01232			108	2.811	61.3153	3.62142			153	-1.13385			43.0712	2.99355
	88.5	3.7398	62.1156	3.54618			118.5	0.05795			40.1709	0.83034			111	3.723	62.3874	3.92174			156	-0.99906			44.0075	2.9008
	91	3.5954	63.2883	3.50548			121	-0.11776			41.0256	0.93568			114	4.347	63.4595	4.09042			159	-0.24025			44.9438	2.27955
	93.5	3.4981	64.461	3.47804			123.5	-0.21978			41.8803	1.87375			117	3.42	64.5315	4.09962			162	0.64959			45.8802	1.84226
	96	3.4813	65.6336	3.4652			126	-0.29821			42.735	1.9816			120	2.459	65.6036	3.94795			165	0.24544			46.8165	1.54699
	98.5	3.4175	66.8063	3.46749			128.5	-0.33976			43.5897	0.96491			123	2.398	66.6757	3.66064			168	-0.52568			47.7528	1.67861
	101	3.5115	67.979	3.48455			131	-0.20343			44.4444	0.2706			126	3.254	67.7477	3.28526			171	-1.31277			48.6891	2.47588
	103.5	3.6592	69.1517	3.51521			133.5	-0.01			45.2991	1.05676			129	4.226	68.8198	2.88388			174	-0.43685			49.6255	2.45402
	106	3.7599	70.3243	3.55752			136	0.1666			46.1538	1.15896			132	3.929	69.8919	2.52277			177	0.5591			50.5618	1.88047
	108.5	3.864	71.497	3.60888			138.5	0.22239			47.0085	0.37393			135	2.902	70.964	2.26145			180	0.72407			51.4981	3.42142
	111	3.8337	72.6697	3.66619			141	0.29487			47.8633	1.07704			138	2.519	72.036	2.14285			183	0.05306			52.4345	1.38188
	113.5	3.8505	73.8423	3.72602			143.5	0.30693			48.718	1.10194			141	2.846	73.1081	2.18631			186	-0.75892			53.3708	5.65434
	116	3.8069	75.015	3.78482			146	0.25528			49.5727	1.19025			144	3.954	74.1802	2.3844			189	-0.55789			54.3071	2.34704
	118.5	3.6793	76.1877	3.83912			148.5	0.13972			50.4273	1.67632			147	4.327	75.2523	2.70419			192	0.26618			55.2435	3.92837
	121	3.4981	77.3604	3.88569			151	0.00744			51.282	0.65487			150	3.41	76.3243	3.09278			195	0.77426			56.1798	5.42286
	123.5	3.3906	78.533	3.92179			153.5	-0.16856			52.1367	1.01506			153	2.484	77.3964	3.48603			198	0.70237			57.1161	5.78159
	126	3.3067	79.7057	3.94526			156	-0.28747			52.9915	0.80156			156	2.615	78.4685	3.81921			201	-0.19949			58.0524	7.46057
	128.5	3.2597	80.8784	3.95467			158.5	-0.21509			53.8462	2.47565			159	3.37	79.5405	4.03765			204	-0.67334			58.9888	13.1303
	131	3.3906	82.0511	3.9494			161	-0.19632			54.7009	1.32523			162	4.256	80.6126	4.10577			207	-0.15616			59.9251	25.3393
	133.5	3.5786	83.2237	3.92967			163.5	-0.10718			55.5556	0.93844			165	3.848	81.6847	4.01292			210	0.75505			60.8614	113.958
	136	3.7498	84.3964	3.89649			166	0.00546			56.4103	0.88831			168	3.073	82.7568	3.77503			213	1.32328			61.7978	18.4118
	138.5	3.8002	85.5691	3.85167			168.5	0.15508			57.265	1.55425			171	2.282	83.8288	3.43201			216	0.16853			62.7341	7.00788
	141	3.8673	86.7417	3.79764			171	0.27439			58.1197	0.91031			174	3.154	84.9009	3.04104			219	-0.63219			63.6704	5.96616
	143.5	3.874	87.9144	3.73735			173.5	0.27288			58.9744	0.71767			177	4.146	85.973	2.66712			222	-0.46689			64.6067	6.53236
	146	3.817	89.0871	3.67411			176	0.23106			59.8291	0.79832			180	4.307	87.0451	2.37232			225	0.42844			65.5431	1.29613
	148.5	3.6961	90.2598	3.61137			178.5	0.13212			60.6838	1.06115			183	3.632	88.1171	2.20554			228	0.90179			66.4794	3.22369
	151	3.5585	91.4324	3.55253			181	-0.00703			61.5385	1.10432			186	2.816	89.1892	2.19447			231	0.95617			67.4157	1.49821
	153.5	3.3772	92.6051	3.50077			183.5	-0.11939			62.3932	0.49818			189	3.013	90.2613	2.34104			234	-0.12742			68.3521	1.6109
	156	3.253	93.7778	3.45884			186	-0.16467			63.2479	1.82218			192	3.833	91.3333	2.62118			237	-0.39499			69.2884	2.08745
	158.5	3.3201	94.9505	3.42893			188.5	-0.18646			64.1026	0.46471			195	4.337	92.4054	2.98882			240	-0.12854			70.2247	1.4309
	161	3.3336	96.1231	3.41254			191	-0.20146			64.9573	0.23355			198	4.261	93.4775	3.38358			243	0.77694			71.1611	2.04701
	163.5	3.4175	97.2958	3.41041			193.5	-0.10568			65.812	1.69682			201	3.355	94.5495	3.74072			246	1.09445			72.0974	0.4729
	166	3.5249	98.4685	3.42243			196	0.00679			66.6667	1.67315			204	2.877	95.6216	4.00187			249	0.38398			73.0337	2.09884
	168.5	3.6693	99.6411	3.44773			198.5	0.12935			67.5214	1.48498			207	3.39	96.6937	4.12465			252	-0.54846			73.97	2.777
	171	3.7834	100.814	3.48466			201	0.17129			68.3761	0.87742			210	4.297	97.7658	4.08961			255	-0.34288			74.9064	1.44845
	173.5	3.7767	101.986	3.53094			203.5	0.23342			69.2308	1.36242			213	4.861	98.8378	3.90343			258	0.55873			75.8427	1.74024
	176	3.7297	103.159	3.58376			206	0.19813			70.0855	0.97728			216	3.702	99.9099	3.59773			261	1.10237			76.779	0.66308
	178.5	3.6256	104.332	3.63995			208.5	0.17623			70.9402	1.23694			219	2.897	100.982	3.22379			264	0.57803			77.7154	1.93321
	181	3.4813	105.504	3.69617			211	0.06042			71.7949	1.57148			222	3.058	102.054	2.84408			267	-0.15228			78.6517	2.16349
	183.5	3.3638	106.677	3.74908			213.5	-0.04201			72.6496	1.18656			225	3.949	103.126	2.52191			270	-0.68656			79.588	1.7443
	186	3.3134	107.85	3.79554			216	-0.13445			73.5043	1.02654			228	4.418	104.198	2.31095			273	-0.22381			80.5243	0.98412
	188.5	3.2865	109.023	3.83281			218.5	-0.2168			74.359	0.58921			231	4.468	105.27	2.24642			276	0.53096			81.4607	1.90841
	191	3.2664	110.195	3.85867			221	-0.23866			75.2137	0.97484			234	3.38	106.342	2.3393			279	0.89376			82.397	0.90985
	193.5	3.3571	111.368	3.87155			223.5	-0.19684			76.0684	1.04503			237	3.108	107.414	2.57456			282	0.14859			83.3333	1.64042
	196	3.4645	112.541	3.87064			226	-0.07444			76.9231	1.36285			240	3.37	108.486	2.91372			285	-0.48655			84.2697	2.25918
	198.5	3.582	113.713	3.8559			228.5	0.05806			77.7778	0.67162			243	4.271	109.559	3.30122			288	-0.49667			85.206	2.0976
	201	3.6189	114.886	3.82807			231	0.14684			78.6325	0.28604			246	4.584	110.631	3.67366			291	0.29924			86.1423	1.43607
	203.5	3.676	116.059	3.78865			233.5	0.20541			79.4872	0.70469			249	3.869	111.703	3.97024			294	0.81219			87.0786	1.19959
	206	3.6357	117.231	3.73978			236	0.16666			80.3419	0.73678			252	2.932	112.775	4.14285			297	0.63115			88.015	1.92813
	208.5	3.6088	118.404	3.68413			238.5	0.10431			81.1966	1.43563			255	3.133	113.847	4.16393			300	-0.14485			88.9513	1.39956
	211	3.488	119.577	3.62473			241	-0.01506			82.0513	0.47488			258	4.03	114.919	4.031			303	-0.67782			89.8876	1.89658
	213.5	3.3806	120.749	3.56483			243.5	-0.10095			82.906	0.12398			261	4.569	115.991	3.76703			306	0.04724			90.824	2.51955
	216	3.2832	121.922	3.50768			246	-0.14305			83.7607	0.39698			264	4.04	117.063	3.41658			309	0.78232			91.7603	1.65153
	218.5	3.1959	123.095	3.45637			248.5	-0.21215			84.6154	0.45089			267	3.305	118.135	3.03838			312	0.94344			92.6966	0.74652
	221	3.1691	124.267	3.41364			251	-0.18388			85.4701	0.23054			270	2.766	119.207	2.69564			315	0.25858			93.633	1.48296
	223.5	3.206	125.44	3.38174			253.5	-0.19251			86.3248	0.29599			273	3.224	120.279	2.4456			318	-0.66825			94.5693	0.58589
	226	3.3235	126.613	3.36228			256	-0.15756			87.1795	0.81415			276	3.974	121.351	2.33005			321	-0.46104			95.5056	2.62678
	228.5	3.4511	127.785	3.35618			258.5	-0.03202			88.0342	0.2708			279	4.332	122.423	2.36852			324	0.49619			96.442	3.40506
	231	3.535	128.958	3.36358			261	0.08691			88.8889	0.55217			282	3.582	123.496	2.55507			327	1.14046			97.3783	0.81472
	233.5	3.5887	130.131	3.38386			263.5	0.19232			89.7436	0.68511			285	2.942	124.568	2.85931			330	0.73775			98.3146	2.06665
	236	3.5451	131.303	3.41569			266	0.20712			90.5983	0.69991			288	2.927	125.64	3.23152			333	0.03807			99.2509	2.69721
	238.5	3.4779	132.476	3.45706			268.5	0.20511			91.453	0.28381			291	3.718	126.712	3.61083			336	-0.47457			100.187	0.61921
	241	3.3537	133.649	3.50544			271	0.03518			92.3077	0.50785			294	4.226	127.784	3.93536			339	0.20982			101.124	0.94541
	243.5	3.263	134.821	3.55793			273.5	-0.02735			93.1624	0.39144			297	4.04	128.856	4.15237			342	0.84523			102.06	1.58731
	246	3.2161	135.994	3.61138			276	-0.1636			94.0171	0.62098			300	3.259	129.928	4.22702			345	0.99668			102.996	1.37978
	248.5	3.1422	137.167	3.66263			278.5	-0.24966			94.8718	1.0969			303	2.721	131	4.14803			348	0.45816			103.933	0.14267
	251	3.1657	138.339	3.70863			281	-0.19134			95.7265	0.33559			306	3.441	132.072	3.92949			351	-0.30632			104.869	1.55744
	253.5	3.1523	139.512	3.74666			283.5	-0.16652			96.5812	1.36544			309	4.171	133.144	3.60853			354	-0.15978			105.805	1.68622
	256	3.1825	140.685	3.77445			286	-0.10152			97.4359	0.97536			312	4.327	134.216	3.2391			357	0.4398			106.742	1.64528
	258.5	3.3033	141.857	3.79033			288.5	0.000465962			98.2906	0.69499			315	3.637	135.288	2.88304			360	1.1354			107.678	1.59337
	261	3.4175	143.03	3.79332			291	0.11574			99.1453	0.14252			318	2.705	136.36	2.59986			363	0.75304			108.614	2.56065
	263.5	3.5182	144.203	3.78315			293.5	0.10691			100	0.75607			321	2.907	137.432	2.4369			366	0.06872			109.551	0.9152
	266	3.5283	145.375	3.76031			296	0.14506			100.855	0.37128			324	3.859	138.505	2.42158			369	-0.46958			110.487	1.70849
	268.5	3.5216	146.548	3.72603			298.5	0.1731			101.709	0.07084			327	4.498	139.577	2.55686			372	0.11016			111.423	1.0823
	271	3.347	147.721	3.68214			301	0.10043			102.564	0.32383			330	4.09	140.649	2.82085			375	1.01793			112.36	0.57305
	273.5	3.2798	148.893	3.63104			303.5	0.05454			103.419	0.21774			333	3.385	141.721	3.17046			378	1.25974			113.296	0.46429
	276	3.1389	150.066	3.57552			306	-0.04506			104.273	0.5869			336	2.867	142.793	3.54853			381	0.33458			114.232	1.52731
	278.5	3.0482	151.239	3.51861			308.5	-0.17817			105.128	0.69595			339	3.546	143.865	3.89334			384	-0.34955			115.169	1.01778
	281	3.1019	152.411	3.46339			311	-0.21729			105.983	0.21412			342	4.176	144.937	4.14878			387	0.15436			116.105	0.82482
	283.5	3.1221	153.584	3.41287			313.5	-0.21622			106.838	0.30085			345	4.322	146.009	4.27363			390	0.7043			117.041	1.46496
	286	3.1825	154.757	3.36973			316	-0.15136			107.692	0.93825			348	3.778	147.081	4.24828			393	1.07827			117.978	0.53554
	288.5	3.2799	155.929	3.33627			318.5	-0.05622			108.547	0.87821			351	3.008	148.153	4.07798			396	0.82228			118.914	2.21087
	291	3.3906	157.102	3.31419			321	-0.00819			109.402	0.99697			354	3.149	149.225	3.7919			399	0.04233			119.85	1.33262
	293.5	3.3772	158.275	3.30457			323.5	0.06333			110.256	0.25399			357	3.743	150.297	3.43825			402	-0.25359			120.787	1.38833
	296	3.4108	159.447	3.30776			326	0.14834			111.111	0.51052			360	4.433	151.369	3.07629			405	0.37252			121.723	2.50186
	298.5	3.4343	160.62	3.32339			328.5	0.15603			111.966	0.55627			363	4.045	152.441	2.76654			408	1.02767			122.659	1.98502
	301	3.3571	161.793	3.35038			331	0.15372			112.821	0.20953			366	3.355	153.514	2.56076			411	1.07885			123.596	0.92596
	303.5	3.3067	162.965	3.38702			333.5	0.08429			113.675	0.56297			369	2.811	154.586	2.49345			414	0.29508			124.532	1.60506
	306	3.2026	164.138	3.43105			336	-0.09935			114.53	1.45039			372	3.385	155.658	2.57617			417	-0.15167			125.468	2.46254
	308.5	3.065	165.311	3.4798			338.5	-0.1923			115.385	0.29688			375	4.287	156.73	2.79567			420	0.09062			126.404	2.18801
	311	3.0214	166.483	3.53036			341	-0.25847			116.239	0.30069			378	4.523	157.802	3.11617			423	0.74695			127.341	2.55939
	313.5	3.018	167.656	3.57972			343.5	-0.24074			117.094	1.07315			381	3.592	158.874	3.48526			426	1.14132			128.277	1.33202
	316	3.0784	168.829	3.62495			346	-0.17933			117.949	0.43644			384	2.902	159.946	3.84263			429	0.79472			129.213	1.59806
	318.5	3.1691	170.001	3.66335			348.5	-0.09783			118.803	0.33305			387	3.4	161.018	4.13004			432	-0.04984			130.15	1.61229
	321	3.2127	171.174	3.69265			351	-0.00634			119.658	0.32397			390	3.944	162.09	4.3009			435	-0.10336			131.086	1.37884
	323.5	3.2798	172.347	3.71109			353.5	0.10204			120.513	0.18794			393	4.312	163.162	4.32795			438	0.41615			132.022	2.10036
	326	3.3604	173.52	3.71753			356	0.18021			121.368	0.26025			396	4.05	164.234	4.20774			441	1.0477			132.959	2.89193
	328.5	3.3637	174.692	3.71152			358.5	0.18777			122.222	0.42089			399	3.264	165.306	3.96114			444	0.78229			133.895	2.11478
	331	3.357	175.865	3.69332			361	0.12491			123.077	0.65754			402	2.962	166.378	3.62982			447	0.10392			134.831	1.36424
	333.5	3.2832	177.038	3.66388			363.5	0.05524			123.932	0.56459			405	3.582	167.45	3.26937			450	-0.27241			135.768	2.37838
	336	3.0952	178.21	3.62478			366	-0.05463			124.786	0.71515			408	4.231	168.523	2.94004			453	-0.14471			136.704	1.55599
	338.5	2.9979	179.383	3.57814			368.5	-0.10412			125.641	0.12297			411	4.276	169.595	2.69684			456	0.69303			137.64	3.17197
	341	2.9274	180.556	3.5265			371	-0.13352			126.496	0.58745			414	3.486	170.667	2.58043			459	1.09781			138.577	1.27253
	343.5	2.9408	181.728	3.47269			373.5	-0.23674			127.35	0.4355			417	3.033	171.739	2.61045			462	0.64664			139.513	2.69276
	346	2.9979	182.901	3.41961			376	-0.24596			128.205	0.8319			420	3.269	172.811	2.78232			465	-0.0925			140.449	1.64642
	348.5	3.0751	184.074	3.37016			378.5	-0.19479			129.06	0.22524			423	3.919	173.883	3.06807			468	-0.3016			141.386	1.67392
	351	3.1623	185.246	3.32698			381	-0.09664			129.915	0.3728			426	4.307	174.955	3.42094			471	0.28934			142.322	0.90276
	353.5	3.2664	186.419	3.29235			383.5	0.0115			130.769	0.32527			429	3.954	176.027	3.78321			474	0.91032			143.258	2.7038
	356	3.3403	187.592	3.26809			386	0.07943			131.624	0.23087			432	3.103	177.099	4.09573			477	0.93234			144.195	0.9159
	358.5	3.3436	188.764	3.25537			388.5	0.11716			132.479	0.35414			435	3.043	178.171	4.30768			480	0.3814			145.131	2.18187
	361	3.2765	189.937	3.25475			391	0.16147			133.333	0.03939			438	3.556	179.243	4.38492			483	-0.2015			146.067	1.76183
	363.5	3.2026	191.11	3.26607			393.5	0.12536			134.188	0.5565			441	4.181	180.315	4.31564			486	0.00764			147.004	0.66761
	366	3.0885	192.282	3.28851			396	0.03205			135.043	0.45763			444	3.909	181.387	4.11224			489	0.73482			147.94	2.48234
	368.5	3.0348	193.455	3.32062			398.5	-0.08807			135.897	0.67129			447	3.224	182.459	3.80923			492	0.87305			148.876	0.92151
	371	3.0012	194.628	3.3604			401	-0.12421			136.752	0.2771			450	2.841	183.532	3.45747			495	0.63832			149.813	0.93547
	373.5	2.8938	195.8	3.40543			403.5	-0.14035			137.607	0.59319			453	2.962	184.604	3.11578			498	-0.10437			150.749	1.93108
	376	2.8804	196.973	3.453			406	-0.17991			138.462	0.47798			456	3.793	185.676	2.84119			501	-0.25302			151.685	2.02586
	378.5	2.9274	198.146	3.50028			408.5	-0.16587			139.316	0.79069			459	4.191	186.748	2.67951			504	0.18737			152.622	2.71148
	381	3.0214	199.318	3.54445			411	-0.09135			140.171	0.38676			462	3.733	187.82	2.65783			507	0.92481			153.558	0.69993
	383.5	3.1254	200.491	3.58289			413.5	-0.00674			141.026	0.69318			465	2.987	188.892	2.78005			510	0.75629			154.494	1.55232
	386	3.1892	201.664	3.61331			416	0.06436			141.88	0.3551			468	2.771	189.964	3.02631			513	0.26481			155.431	2.50037
	388.5	3.2228	202.836	3.63388			418.5	0.11535			142.735	0.3712			471	3.355	191.036	3.3563			516	-0.28163			156.367	0.59408
	391	3.263	204.009	3.64336			421	0.16303			143.59	0.46575			474	3.969	192.108	3.71599			519	-0.08702			157.303	1.59279
	393.5	3.2228	205.182	3.64112			423.5	0.12			144.444	0.34103			477	3.984	193.18	4.04652			522	0.40364			158.24	1.53954
	396	3.1254	206.354	3.6272			426	0.01986			145.299	0.35541			480	3.426	194.252	4.29399			525	0.89434			159.176	2.20968
	398.5	3.0012	207.527	3.60231			428.5	-0.0668			146.154	0.1485			483	2.836	195.324	4.4183			528	0.30808			160.112	1.62192
	401	2.961	208.7	3.56778			431	-0.08306			147.009	0.15273			486	3.038	196.396	4.39977			531	-0.08214			161.049	0.96544
	403.5	2.9408	209.872	3.52548			433.5	-0.08243			147.863	0.38656			489	3.758	197.468	4.24234			534	-0.3053			161.985	2.91256
	406	2.8972	211.045	3.4777			436	-0.11212			148.718	0.30098			492	3.889	198.541	3.97287			537	-0.00042657			162.921	3.55605
	408.5	2.9072	212.218	3.42706			438.5	-0.12161			149.573	0.4765			495	3.647	199.613	3.63664			540	0.8235			163.858	1.34374
	411	2.9777	213.39	3.37629			441	-0.12442			150.427	0.59174			498	2.897	200.685	3.28988			543	0.57946			164.794	1.50137
	413.5	3.0583	214.563	3.32816			443.5	-0.00303			151.282	0.65387			501	2.741	201.757	2.9904			546	0.01848			165.73	1.0045
	416	3.1254	215.736	3.28525			446	0.10154			152.137	0.35164			504	3.174	202.829	2.78811			549	-0.64346			166.667	1.35235
	418.5	3.1724	216.908	3.24984			448.5	0.1221			152.991	0.26898			507	3.904	203.901	2.71675			552	-0.16735
	421	3.2161	218.081	3.22378			451	0.15286			153.846	0.35184			510	3.728	204.973	2.78838			555	0.5918
	423.5	3.1691	219.254	3.20838			453.5	0.0862			154.701	0.32296			513	3.229	206.045	2.9914			558	0.625
	426	3.065	220.426	3.20433			456	0.06993			155.556	0.07484			516	2.675	207.117	3.29257			561	0.40625
	428.5	2.9744	221.599	3.21169			458.5	0.01665			156.41	0.64635			519	2.862	208.189	3.64248			564	-0.38045
	431	2.9542	222.772	3.22987			461	-0.04663			157.265	0.50496			522	3.345	209.261	3.98379			567	-0.29211
	433.5	2.9509	223.944	3.25766			463.5	-0.12343			158.12	0.46564			525	3.828	210.333	4.2607			570	0.01328
	436	2.9173	225.117	3.29332			466	-0.14644			158.974	0.1402			528	3.234	211.405	4.42812			573	0.45472
	438.5	2.9039	226.29	3.33466			468.5	-0.14606			159.829	0.1781			531	2.836	212.477	4.45916			576	0.59921
	441	2.8972	227.462	3.37918			471	-0.14229			160.684	0.71545			534	2.605	213.55	4.34947			579	-0.48425
	443.5	3.0147	228.635	3.42422			473.5	-0.07473			161.538	0.2635			537	2.902	214.622	4.11796			582	-0.72266
	446	3.1154	229.808	3.4671			476	-0.03748			162.393	0.26597			540	3.718	215.694	3.80359			585	-0.42202
	448.5	3.1321	230.98	3.50526			478.5	0.01996			163.248	0.2771			543	3.466	216.766	3.45892			588	0.19066
	451	3.159	232.153	3.53644			481	0.02709			164.103	0.75577			546	2.897	217.838	3.14139			591	0.7084
	453.5	3.0885	233.326	3.55877			483.5	0.10131			164.957	0.25109			549	2.227	218.91	2.90384			594	0.26919
	456	3.0684	234.499	3.57088			486	0.09492			165.812	0.43819			552	2.695	219.982	2.78579			597	-0.39697
	458.5	3.0113	235.671	3.57202			488.5	0.02142			166.667	0.36775			555	3.446	221.054	2.80695			600	-0.53908
	461	2.9442	236.844	3.56203			491	0.00162			167.521	0.49681			558	3.471	222.126	2.96398			603	0.07886
	463.5	2.8636	238.017	3.5414			493.5	-0.1054			168.376	0.19212			561	3.244	223.198	3.23113			606	0.71185
	466	2.8368	239.189	3.51122			496	-0.09503			169.231	0.39586			564	2.449	224.27	3.56452			609	0.48489
	468.5	2.8334	240.362	3.47311			498.5	-0.01087			170.085	0.08638			567	2.529	225.342	3.9094			612	-0.11001
	471	2.8334	241.535	3.42915			501	-0.00382			170.94	0.57211			570	2.826	226.414	4.20925			615	-0.61486
	473.5	2.8972	242.707	3.38171			503.5	-0.000178868			171.795	0.73731			573	3.259	227.486	4.4151			618	-0.22766
	476	2.9307	243.88	3.33339			506	-0.02345			172.65	0.20867			576	3.395	228.559	4.49356			621	0.1936
	478.5	2.9844	245.053	3.2868			508.5	0.04397			173.504	0.18244			579	2.303	229.631	4.43238			624	0.67191
	481	2.9878	246.225	3.24444			511	0.09459			174.359	0.54071			582	2.056	230.703	4.24236			627	0.03127
	483.5	3.0583	247.398	3.20858			513.5	0.11499			175.214	0.55067			585	2.348	231.775	3.95555			630	-0.42731
	486	3.0482	248.571	3.1811			516	0.09508			176.068	0.39408			588	2.952	232.847	3.61989			633	-0.54384
	488.5	2.971	249.743	3.16339			518.5	0.03827			176.923	0.51003			591	3.461	233.919	3.29129			636	-0.11632
	491	2.9475	250.916	3.1563			521	-0.05216			177.778	0.3254			594	3.013	234.991	3.02439			639	0.44226
	493.5	2.8368	252.089	3.16005			523.5	-0.0956			178.632	0.43245			597	2.338	236.063	2.86349			642	0.2959
	496	2.8435	253.261	3.17426			526	-0.03164			179.487	0.03403			600	2.187	237.135	2.83532			645	-0.33441
	498.5	2.924	254.434	3.19796			528.5	-0.065			180.342	0.10941			603	2.796	238.207	2.94463			648	-0.55066
	501	2.9274	255.607	3.22963			531	-0.05816			181.197	0.52421			606	3.42	239.279	3.17344			651	-0.23386
	503.5	2.9274	256.779	3.26734			533.5	-0.06464			182.051	0.25449			609	3.184	240.351	3.48409			654	0.189
	506	2.9005	257.952	3.30878			536	-0.03432			182.906	0.3952			612	2.58	241.423	3.82548			657	0.51592
	508.5	2.9643	259.125	3.35146			538.5	0.01619			183.761	0.04026			615	2.066	242.495	4.14154			660	-0.03311
	511	3.0113	260.297	3.39285			541	0.07678			184.615	0.33952			618	2.444	243.568	4.38048			663	-0.49607
	513.5	3.0281	261.47	3.43046			543.5	0.11717			185.47	0.3072			621	2.856	244.64	4.50335			666	-0.58198
	516	3.0046	262.643	3.46207			546	0.05015			186.325	0.58739			624	3.325	245.712	4.49044			669	-0.13883
	518.5	2.9442	263.815	3.48578			548.5	-0.01018			187.179	0.07147			627	2.675	246.784	4.34449			672	0.18837
	521	2.8502	264.988	3.50016			551	-0.02342			188.034	0.11309			630	2.207	247.856	4.09019			675	0.13864
	523.5	2.8032	266.161	3.5043			553.5	0.00683			188.889	0.27721			633	2.081	248.928	3.77006			678	-0.36004
	526	2.8636	267.333	3.4979			556	-0.06023			189.744	0.28908			636	2.499	250	3.4374			681	-0.64165
	528.5	2.8267	268.506	3.48123			558.5	-0.05009			190.598	0.18362			639	3.048	251.072	3.14746			684	-0.46521
	531	2.83	269.679	3.45517			561	0.02383			191.453	0.2625			642	2.892	252.144	2.94831			687	0.1603
	533.5	2.82	270.851	3.4211			563.5	0.00374			192.308	0.37924			645	2.252	253.216	2.87292			690	0.46286
	536	2.8468	272.024	3.38087			566	0.00385			193.162	0.10347			648	2.026	254.288	2.93378			693	-0.23651
	538.5	2.8938	273.197	3.33666			568.5	0.06424			194.017	0.08617			651	2.333	255.36	3.12082			696	-0.61382
	541	2.9509	274.369	3.29089			571	0.14823			194.872	0.36497			654	2.746	256.432	3.40319			699	-0.68407
	543.5	2.9878	275.542	3.24601			573.5	0.11131			195.726	0.36002			657	3.063	257.505	3.73432			702	-0.05826
	546	2.9173	276.715	3.20447			576	0.12137			196.581	0.35651			660	2.504	258.577	4.05972			705	0.36062
	548.5	2.8535	277.887	3.16847			578.5	0.11133			197.436	0.20031			663	2.031	259.649	4.32592			708	0.26055
	551	2.8368	279.06	3.13991			581	0.04758			198.291	0.03841			666	1.935	260.721	4.48936			711	-0.36845
	553.5	2.8636	280.233	3.12025			583.5	-0.01627			199.145	0.62343			669	2.368	261.793	4.52351			714	-0.83038
	556	2.7931	281.405	3.11047			586	-0.05654			200	0.23642			672	2.685	262.865	4.42324			717	-0.60225
	558.5	2.7998	282.578	3.11094			588.5	-0.14722							675	2.625	263.937	4.20561			720	0.10294
	561	2.8703	283.751	3.12147			591	-0.1708							678	2.116	265.009	3.90703			723	0.10419
	563.5	2.8468	284.923	3.14131			593.5	-0.1205							681	1.824	266.081	3.57717			726	-0.09548
	566	2.8435	286.096	3.16917			596	-0.0366							684	1.99	267.153	3.27077			729	-0.5521
	568.5	2.9005	287.269	3.20332			598.5	-0.00651							687	2.605	268.225	3.03858			732	-0.69164
	571	2.9811	288.441	3.24167			601	0.09756							690	2.897	269.297	2.91898			735	-0.16212
	573.5	2.9408	289.614	3.28191			603.5	0.15453							693	2.187	270.369	2.93166			738	0.16146
	576	2.9475	290.787	3.32163			606	0.1544							696	1.799	271.441	3.07447			741	0.02211
	578.5	2.9341	291.959	3.35846			608.5	0.03005							699	1.718	272.514	3.32372			744	-0.38417
	581	2.867	293.132	3.3902			611	0.00979							702	2.333	273.586	3.63824			747	-0.81038
	583.5	2.7998	294.305	3.41496			613.5	0.00973							705	2.741	274.658	3.96613			750	-0.36052
	586	2.7562	295.477	3.43125			616	-0.05425							708	2.63	275.73	4.2534			753	-0.0356
	588.5	2.6622	296.65	3.43804			618.5	-0.07453							711	1.99	276.802	4.45287			756	0.21739
	591	2.6353	297.823	3.43489			621	-0.09142							714	1.517	277.874	4.53196			759	-0.11754
	593.5	2.6823	298.995	3.42189			623.5	-0.06142							717	1.734	278.946	4.47799			762	-0.68941
	596	2.7629	300.168	3.39969			626	-0.03473							720	2.428	280.018	4.30032			765	-0.71321
	598.5	2.7897	301.341	3.36949			628.5	-0.00124							723	2.418	281.09	4.02866			768	-0.30794
	601	2.8905	302.514	3.33291			631	0.04223							726	2.207	282.162	3.70819			771	0.3144
	603.5	2.9442	303.686	3.29192			633.5	0.1092							729	1.739	283.234	3.39205			774	0.08982
	606	2.9408	304.859	3.24876			636	0.11566							732	1.588	284.306	3.13254			777	-0.53269
	608.5	2.8132	306.032	3.20576			638.5	0.11541							735	2.106	285.378	2.9725			780	-0.92214
	611	2.7897	307.204	3.16524			641	0.08505							738	2.418	286.45	2.93826			783	-0.55751
	613.5	2.7864	308.377	3.12937			643.5	0.03778							741	2.267	287.523	3.03531			786	-0.0918
	616	2.7192	309.55	3.10005			646	0.0107							744	1.849	288.595	3.24746			789	0.15297
	618.5	2.6957	310.722	3.07879			648.5	-0.07008							747	1.411	289.667	3.53952			792	-0.26717
	621	2.6756	311.895	3.06666			651	-0.06697							750	1.849	290.739	3.86321			795	-0.64225
	623.5	2.7024	313.068	3.06417			653.5	-0.09418							753	2.162	291.811	4.16511			798	-0.74025
	626	2.7259	314.24	3.07132			656	0.00972							756	2.403	292.883	4.39548			801	-0.15817
	628.5	2.7562	315.413	3.08754			658.5	0.006							759	2.056	293.955	4.51653			804	0.11198
	631	2.7965	316.586	3.11176			661	0.05617							762	1.472	295.027	4.50855			807	-0.1518
	633.5	2.8603	317.758	3.14245			663.5	0.07594							765	1.436	296.099	4.37319			810	-0.6115
	636	2.8636	318.931	3.17773			666	0.126							768	1.829	297.171	4.13311			813	-0.72412
	638.5	2.8602	320.104	3.21546			668.5	0.11234							771	2.439	298.243	3.82823			816	-0.50466
	641	2.8267	321.276	3.25337			671	0.11539							774	2.202	299.315	3.50903			819	0.06787
	643.5	2.7763	322.449	3.28921			673.5	0.09482							777	1.567	300.387	3.2283			822	0.10249
	646	2.7461	323.622	3.32082			676	0.11804							780	1.165	301.459	3.03232			825	-0.28182
	648.5	2.6622	324.794	3.34633			678.5	0.05056							783	1.517	302.532	2.95329			828	-0.80205
	651	2.6622	325.967	3.36418			681	-0.01353							786	1.97	303.604	3.00404			831	-0.7182
	653.5	2.6319	327.14	3.3733			683.5	-0.04413							789	2.202	304.676	3.17594			834	-0.43727
	656	2.7327	328.312	3.37307			686	-0.03444							792	1.769	305.748	3.44035			837	0.11574
	658.5	2.7259	329.485	3.36344			688.5	0.04575							795	1.381	306.82	3.75344			840	-0.12717
	661	2.773	330.658	3.34488			691	0.07562							798	1.27	307.892	4.0634			843	-0.737
	663.5	2.7897	331.83	3.31836			693.5	0.04499							801	1.839	308.964	4.31908			846	-0.79374
	666	2.8367	333.003	3.2853			696	0.06805							804	2.096	310.036	4.47834			849	-0.51241
	668.5	2.82	334.176	3.2475			698.5	0.118							807	1.819	311.108	4.51509			852	-0.07499
	671	2.82	335.348	3.207			701	0.09415							810	1.346	312.18	4.42348			855	0.19151
	673.5	2.7964	336.521	3.16599			703.5	0.05009							813	1.22	313.252	4.21888			858	-0.4479
	676	2.8166	337.694	3.12669			706	0.04632							816	1.426	314.324	3.93525			861	-0.76623
	678.5	2.7461	338.866	3.0912			708.5	-0.03806							819	1.985	315.396	3.61955			864	-0.75647
	681	2.679	340.039	3.06141			711	-0.06875							822	2.006	316.468	3.32391			867	-0.06663
	683.5	2.6454	341.212	3.03887			713.5	-0.06925							825	1.608	317.541	3.09705			870	0.16929
	686	2.6521	342.384	3.02471			716	-0.06965							828	1.074	318.613	2.97621			873	-0.08769
	688.5	2.7293	343.557	3.01958			718.5	-0.00966							831	1.144	319.685	2.98107			876	-0.47959
	691	2.7562	344.73	3.02363			721	-0.01018							834	1.411	320.757	3.11047			879	-0.61541
	693.5	2.7226	345.902	3.03647			723.5	0.0363							837	1.95	321.829	3.34274			882	-0.40913
	696	2.7427	347.075	3.05723			726	0.06276							840	1.693	322.901	3.63922			885	0.07923
	698.5	2.7897	348.248	3.08458			728.5	0.04882							843	1.069	323.973	3.95074			888	0.19068
	701	2.7629	349.42	3.11683			731	0.02817							846	0.998	325.045	4.22576			891	-0.31778
	703.5	2.7159	350.593	3.15201			733.5	0.02762							849	1.265	326.117	4.41886			894	-0.64415
	706	2.7092	351.766	3.18801			736	0.02035							852	1.688	327.189	4.49821			897	-0.52843
	708.5	2.6219	352.938	3.22267			738.5	-0.000318034							855	1.94	328.261	4.45084			900	0.07238
	711	2.5883	354.111	3.25392			741	-0.0512							858	1.286	329.333	4.28474			903	0.30928
	713.5	2.5849	355.284	3.27989			743.5	-0.07188							861	0.953	330.405	4.02744			906	0.10928
	716	2.5816	356.456	3.29901			746	-0.04888							864	0.948	331.477	3.7215			909	-0.35364
	718.5	2.6387	357.629	3.31011			748.5	0.01762							867	1.623	332.55	3.41738			912	-0.45346
	721	2.6353	358.802	3.3125			751	0.01371							870	1.844	333.622	3.16516			915	-0.20018
	723.5	2.6789	359.974	3.30596			753.5	0.00649							873	1.572	334.694	3.00624			918	0.35518
	726	2.7025	361.147	3.29078			756	0.05957							876	1.165	335.766	2.9665			921	0.36164
	728.5	2.6857	362.32	3.26775			758.5	0.02204							879	1.014	336.838	3.0521			924	-0.2208
	731	2.6622	363.492	3.2381			761	0.0685							882	1.205	337.91	3.2485			927	-0.44615
	733.5	2.6588	364.665	3.20342			763.5	0.06785							885	1.678	338.982	3.52289			930	-0.4194
	736	2.6487	365.838	3.1656			766	0.0102							888	1.774	340.054	3.82962			933	0.06545
	738.5	2.6252	367.011	3.12668			768.5	0.00953							891	1.25	341.126	4.11783			936	0.42539
	741	2.5715	368.183	3.08876			771	-0.04473							894	0.908	342.198	4.33978			939	0.20543
	743.5	2.548	369.356	3.05387			773.5	-0.07901							897	1.008	343.27	4.45881			942	-0.34643
	746	2.5682	370.529	3.02388			776	-0.07289							900	1.593	344.342	4.45527			945	-0.4652
	748.5	2.6319	371.701	3.00034			778.5	-0.10379							903	1.814	345.414	4.32983			948	-0.20086
	751	2.6252	372.874	2.98446			781	-0.00368							906	1.598	346.486	4.10323			951	0.40058
	753.5	2.6152	374.047	2.977			783.5	-0.01109							909	1.119	347.559	3.8129			954	0.35211
	756	2.6655	375.219	2.97823			786	0.0285							912	1.003	348.631	3.5067			957	-0.22925
	758.5	2.6252	376.392	2.98794			788.5	0.08488							915	1.24	349.703	3.23499			960	-0.27151
	761	2.6689	377.565	3.00542			791	0.08425							918	1.779	350.775	3.04234			963	-0.30966
	763.5	2.6655	378.737	3.02956			793.5	0.05332							921	1.769	351.847	2.96017			966	0.19228
	766	2.6051	379.91	3.05883			796	0.01238							924	1.17	352.919	3.00157			969	0.38133
	768.5	2.6017	381.083	3.09146			798.5	-0.01187							927	0.928	353.991	3.15923			972	0.09749
	771	2.5447	382.255	3.12546			801	-0.02603							930	0.938	355.063	3.40664			975	-0.39325
	773.5	2.5077	383.428	3.1588			803.5	-0.00989							933	1.406	356.135	3.70251			978	-0.39489
	776	2.5111	384.601	3.18947			806	-0.01736							936	1.749	357.207	3.99765			981	-0.03342
	778.5	2.4775	385.773	3.21564			808.5	-0.04164							939	1.512	358.279	4.24309			984	0.45316
	781	2.5749	386.946	3.23574			811	0.02478							942	0.943	359.351	4.39814			987	0.13984
	783.5	2.5648	388.119	3.24854			813.5	0.04419							945	0.807	360.423	4.43713			990	-0.06336
	786	2.6017	389.291	3.25324			816	0.02999							948	1.054	361.495	4.3536			993	-0.40246
	788.5	2.6554	390.464	3.2495			818.5	0.01919							951	1.638	362.568	4.16132			996	-0.17645
	791	2.6521	391.637	3.23746			821	0.07207							954	1.572	363.64	3.89197			999	0.35167
	793.5	2.6185	392.809	3.21772			823.5	0.07135							957	0.973	364.712	3.58991			1002	0.6579
	796	2.5749	393.982	3.19134			826	0.02023							960	0.913	365.784	3.30477			1005	0.13324
	798.5	2.548	395.155	3.15972			828.5	-0.0276							963	0.857	366.856	3.08331			1008	-0.19531
	801	2.5312	396.327	3.12458			831	-0.06864							966	1.341	367.928	2.96164			1011	-0.18074
	803.5	2.5447	397.5	3.08781			833.5	-0.02919							969	1.512	369	2.95935			1014	0.14094
	806	2.5346	398.673	3.0514			836	-0.00644							972	1.21	370.072	3.07625			1017	0.44773
	808.5	2.5077	399.845	3.01731			838.5	-0.0442							975	0.701	371.144	3.29249			1020	0.38263
	811	2.5715	401.018	2.98735			841	-0.02827							978	0.681	372.216	3.57183			1023	0.04465
	813.5	2.5883	402.191	2.96309			843.5	0.01456							981	1.024	373.288	3.8677			1026	-0.30221
	816	2.5715	403.363	2.94578			846	0.01038							984	1.492	374.36	4.1309			1029	-0.11096
	818.5	2.5581	404.536	2.93627			848.5	0.04639							987	1.16	375.432	4.31771			1032	0.49841
	821	2.6084	405.709	2.93495			851	0.06569							990	0.938	376.505	4.3971			1035	0.5689
	823.5	2.6051	406.881	2.94176			853.5	0.02789							993	0.58	377.577	4.35586			1038	0.33351
	826	2.5514	408.054	2.95618			856	0.000185837							996	0.787	378.649	4.20069			1041	0.02623
	828.5	2.501	409.227	2.97724			858.5	0.01947							999	1.296	379.721	3.95709			1044	-0.09892
	831	2.4574	410.399	3.00362			861	0.03205							1002	1.583	380.793	3.66511			1047	0.32004
	833.5	2.4943	411.572	3.0337			863.5	-0.02258							1005	1.039	381.865	3.37269			1050	0.58313
	836	2.5145	412.745	3.06564			866	-0.02011							1008	0.691	382.937	3.12774			1053	0.44334
	838.5	2.4742	413.917	3.09752			868.5	-0.000851616							1011	0.686	384.009	2.97023			1056	0.14167
	841	2.4876	415.09	3.12743			871	-0.0185							1014	0.988	385.081	2.9256			1059	-0.04288
	843.5	2.5279	416.263	3.15358			873.5	-0.04965							1017	1.275	386.153	3.00061			1062	0.1947
	846	2.5212	417.435	3.1744			876	0.06359							1020	1.19	387.225	3.18223			1065	0.6804
	848.5	2.5547	418.608	3.18861			878.5	0.06602							1023	0.832	388.297	3.43987			1068	0.81723
	851	2.5715	419.781	3.19534			881	0.11875							1026	0.465	389.369	3.73045			1071	0.50718
	853.5	2.5312	420.953	3.19413			883.5	0.15817							1029	0.636	390.441	4.00552			1074	0.04626
	856	2.501	422.126	3.18498			886	0.10348							1032	1.225	391.514	4.21929			1077	0.22447
	858.5	2.5178	423.299	3.16833			888.5	0.07899							1035	1.275	392.586	4.3362			1080	0.4888
	861	2.5279	424.471	3.14507			891	0.05789							1038	1.019	393.658	4.33674			1083	0.86327
	863.5	2.4708	425.644	3.11642			893.5	0.06698							1041	0.691	394.73	4.22063
	866	2.4708	426.817	3.08394			896	0.01907							1044	0.545	395.802	4.00688
	868.5	2.4876	427.989	3.04937			898.5	-0.07925							1047	0.943	396.874	3.73053
	871	2.4675	429.162	3.01458			901	-0.03658							1050	1.185	397.946	3.43693
	873.5	2.4339	430.335	2.98145			903.5	-0.05441							1053	1.024	399.018	3.17413
	876	2.5447	431.508	2.95173			906	-0.03855							1056	0.701	400.09	2.98502
	878.5	2.5447	432.68	2.927			908.5	0.01751							1059	0.495	401.162	2.90022
	881	2.595	433.853	2.90853			911	0.06686							1062	0.711	402.234	2.93306
	883.5	2.632	435.026	2.89725			913.5	0.0792							1065	1.175	403.306	3.07743
	886	2.5749	436.198	2.89365			916	0.06474							1068	1.29	404.378	3.3088
	888.5	2.548	437.371	2.89781			918.5	0.04357							1071	0.958	405.45	3.58833
	891	2.5245	438.544	2.90935			921	-0.00441							1074	0.475	406.523	3.8693
	893.5	2.5312	439.716	2.92749			923.5	-0.04239							1077	0.631	407.595	4.10485
	896	2.4809	440.889	2.95106			926	-0.03338							1080	0.873	408.667	4.25572
	898.5	2.3802	442.062	2.97861			928.5	-0.04787							1083	1.225	409.739	4.2967
	901	2.4205	443.234	3.00845			931	-0.07577									410.811	4.22076
	903.5	2.4003	444.407	3.03879			933.5	-0.08688									411.883	4.0402
	906	2.4138	445.58	3.06778			936	-0.02079									412.955	3.78455
	908.5	2.4675	446.752	3.0937			938.5	0.03179									414.027	3.49568
	911	2.5145	447.925	3.11499			941	0.04416									415.099	3.22084
	913.5	2.5245	449.098	3.13035			943.5	0.08673									416.171	3.00489
	916	2.5077	450.27	3.13883			946	0.0823									417.243	2.88282
	918.5	2.4842	451.443	3.13989			948.5	0.00735									418.315	2.8741
	921	2.4339	452.616	3.13339			951	-0.0206									419.387	2.9794
	923.5	2.3936	453.788	3.11964			953.5	0.00175									420.459	3.18058
	926	2.4003	454.961	3.09933			956	0.00399									421.532	3.44371
	928.5	2.3835	456.134	3.07356			958.5	-0.04408									422.604	3.72468
	931	2.3533	457.306	3.04369			961	-0.07886									423.676	3.97653
	933.5	2.3399	458.479	3.01135			963.5	-0.10684									424.748	4.15722
	936	2.4037	459.652	2.97827			966	-0.05422									425.82	4.23651
	938.5	2.454	460.824	2.94623			968.5	0.01849									426.892	4.20098
	941	2.4641	461.997	2.91695			971	0.05419									427.964	4.05619
	943.5	2.5044	463.17	2.89198			973.5	0.18059									429.036	3.82572
	946	2.4977	464.342	2.8726			976	0.14248									430.108	3.54722
	948.5	2.4205	465.515	2.8598			978.5	0.06746									431.18	3.26623
	951	2.3903	466.688	2.85417			981	0.10994									432.252	3.02856
	953.5	2.4104	467.86	2.85591			983.5	0.06851									433.324	2.87279
	956	2.4104	469.033	2.86478			986	0.01698									434.396	2.8239
	958.5	2.3601	470.206	2.88015			988.5	-0.03796									435.468	2.88916
	961	2.3231	471.378	2.90102			991	-0.066									436.541	3.05697
	963.5	2.2929	472.551	2.92609			993.5	-0.09405									437.613	3.29883
	966	2.3433	473.724	2.95382			996	-0.02141									438.685	3.57407
	968.5	2.4138	474.896	2.98252			998.5	0.03103									439.757	3.83658
	971	2.4473	476.069	3.01047			1001	0.00966									440.829	4.04246
	973.5	2.5715	477.242	3.03597			1003.5	0.00849									441.901	4.15723
	976	2.5312	478.414	3.05751			1006	0.01391									442.973	4.16154
	978.5	2.454	479.587	3.07377			1008.5	0.00603									444.045	4.05428
	981	2.4943	480.76	3.08376			1011	-0.01536									445.117	3.8528
	983.5	2.4507	481.932	3.08684			1013.5	-0.01326									446.189	3.58994
	986	2.397	483.105	3.08276			1016	-0.02126									447.261	3.30859
	988.5	2.3399	484.278	3.07168			1018.5	-0.04267									448.333	3.05463
	991	2.3097	485.45	3.05417			1021	-0.05068									449.405	2.86929
	993.5	2.2795	486.623	3.03116			1023.5	-0.0754									450.477	2.7824
	996	2.35	487.796	3.00385			1026	-0.05992									451.55	2.80747
	998.5	2.4003	488.968	2.97374			1028.5	-0.02425									452.622	2.93948
	1001	2.3768	490.141	2.94243			1031	-0.01219									453.694	3.15579
	1003.5	2.3735	491.314	2.91162			1033.5	-0.00673									454.766	3.41985
	1006	2.3768	492.486	2.88294			1036	0.03893									455.838	3.68733
	1008.5	2.3668	493.659	2.85793			1038.5	-0.01273									456.91	3.9134
	1011	2.3433	494.832	2.83787			1041	0.06992									457.982	4.06018
	1013.5	2.3433	496.005	2.8238			1043.5	0.04505									459.054	4.10295
	1016	2.3332	497.177	2.81639			1046	0.06059									460.126	4.03418
	1018.5	2.3097	498.35	2.81594			1048.5	0.01561									461.198	3.86482
	1021	2.2996	499.523	2.82233			1051	-0.02607									462.27	3.62234
	1023.5	2.2728	500.695	2.8351			1053.5	0.01295									463.342	3.34628
	1026	2.2862	501.868	2.85338			1056	-0.02204									464.414	3.08159
	1028.5	2.3198	503.041	2.87603			1058.5	-0.04354									465.486	2.87127
	1031	2.3298	504.213	2.90164			1061	-0.02474									466.559	2.74925
	1033.5	2.3332	505.386	2.92865			1063.5	-0.02944									467.631	2.7348
	1036	2.3768	506.559	2.95543			1066	0.03965									468.703	2.82939
	1038.5	2.3231	507.731	2.98037			1068.5	0.08193									469.775	3.01649
	1041	2.4037	508.904	3.00196			1071	0.07391									470.847	3.26432
	1043.5	2.3768	510.077	3.0189			1073.5	0.04558									471.919	3.53114
	1046	2.3903	511.249	3.03015			1076	0.000547981									472.991	3.77216
	1048.5	2.3433	512.422	3.035			1078.5	0.02271									474.063	3.94693
	1051	2.2996	513.595	3.03311			1081	0.06827									475.135	4.02604
	1053.5	2.3366	514.767	3.02451			1083.5	0.02992									476.207	3.9959
	1056	2.2996	515.94	3.00964			1086	-0.03184									477.279	3.86101
	1058.5	2.2761	517.113	2.98926			1088.5	-0.08369									478.351	3.64314
	1061	2.2929	518.285	2.96445			1091	-0.07496									479.423	3.3777
	1063.5	2.2862	519.458	2.93655			1093.5	-0.05963									480.495	3.1079
	1066	2.3533	520.631	2.90706			1096	-0.0879									481.568	2.87755
	1068.5	2.3936	521.803	2.87757			1098.5	-0.00548									482.64	2.72387
	1071	2.3836	522.976	2.84964			1101	-0.02027									483.712	2.67134
	1073.5	2.3533	524.149	2.82477			1103.5	-0.03516									484.784	2.72769
	1076	2.3063	525.321	2.80425			1106	-0.02315									485.856	2.88264
	1078.5	2.3265	526.494	2.78914			1108.5	-0.02125									486.928	3.10966
	1081	2.3701	527.667	2.78018			1111	-0.07316									488	3.37038
	1083.5	2.3298	528.839	2.77775			1113.5	-0.12157									489.072	3.62094
	1086	2.2661	530.012	2.78188			1116	-0.11638									490.144	3.81924
	1088.5	2.2123	531.185	2.7922			1118.5	-0.0205									491.216	3.9319
	1091	2.2191	532.357	2.80802			1121	0.01157									492.288	3.93974
	1093.5	2.2325	533.53	2.82831			1123.5	0.04374									493.36	3.84092
	1096	2.2023	534.703	2.85182			1126	0.0254									494.432	3.65122
	1098.5	2.2828	535.875	2.87711			1128.5	-0.00964									495.505	3.40137
	1101	2.2661	537.048	2.90264			1131	-0.04138									496.577	3.13199
	1103.5	2.2493	538.221	2.92686			1133.5	-0.04953									497.649	2.8868
	1106	2.2594	539.393	2.94833			1136	0.00601									498.721	2.70548
	1108.5	2.2594	540.566	2.96574			1138.5	0.06485									499.793	2.61703
	1111	2.2056	541.739	2.97802			1141	0.02309									500.865	2.6351
	1113.5	2.1553	542.911	2.98442			1143.5	-0.01538									501.937	2.75568
	1116	2.1586	544.084	2.98449			1146	-0.07396									503.009	2.95788
	1118.5	2.2526	545.257	2.97817			1148.5	-0.07554									504.081	3.20735
	1121	2.2828	546.429	2.96576			1151	-0.07032									505.153	3.46202
	1123.5	2.3131	547.602	2.94789			1153.5	0.03219									506.225	3.67904
	1126	2.2929	548.775	2.9255			1156	0.03399									507.297	3.82187
	1128.5	2.256	549.947	2.89979			1158.5	-0.00111									508.369	3.86628
	1131	2.2224	551.12	2.87215			1161	-0.02951									509.441	3.80434
	1133.5	2.2124	552.293	2.84405			1163.5	0.04608									510.514	3.64569
	1136	2.2661	553.465	2.817			1166	-0.01254									511.586	3.41593
	1138.5	2.3231	554.638	2.79243			1168.5	-0.09466									512.658	3.15232
	1141	2.2795	555.811	2.77165			1171	-0.10968									513.73	2.89764
	1143.5	2.2392	556.983	2.75571			1173.5	-0.10121									514.802	2.6931
	1146	2.1788	558.156	2.74542			1176	-0.07594									515.874	2.57156
	1148.5	2.1754	559.329	2.74123			1178.5	-0.06078									516.946	2.55207
	1151	2.1788	560.501	2.74328													518.018	2.63684
	1153.5	2.2795	561.674	2.75133													519.09	2.81081
	1156	2.2795	562.847	2.76481													520.162	3.04426
	1158.5	2.2426	564.02	2.78283													521.234	3.29769
	1161	2.2124	565.192	2.80427													522.306	3.5284
	1163.5	2.2862	566.365	2.82781													523.378	3.6975
	1166	2.2258	567.538	2.85201													524.45	3.77637
	1168.5	2.1419	568.71	2.87541													525.523	3.75134
	1171	2.1251	569.883	2.89659													526.595	3.62593
	1173.5	2.1318	571.056	2.91428													527.667	3.42019
	1176	2.1553	572.228	2.92739													528.739	3.16742
	1178.5	2.1687	573.401	2.93511													529.811	2.9086
			574.574	2.93694													530.883	2.68562
			575.746	2.93271													531.955	2.53436
			576.919	2.92259													533.027	2.47881
			578.092	2.90709													534.099	2.52706
			579.264	2.88703													535.171	2.67008
			580.437	2.86347													536.243	2.8832
			581.61	2.83768													537.315	3.13023
			582.782	2.81103													538.387	3.36945
			583.955	2.78496													539.459	3.56052
			585.128	2.76085													540.532	3.67112
			586.3	2.73998													541.604	3.68229
			587.473	2.72341													542.676	3.59153
			588.646	2.712													543.748	3.41315
			589.818	2.70626													544.82	3.17591
			590.991	2.70643													545.892	2.91822
			592.164	2.71237													546.964	2.68178
			593.336	2.72363													548.036	2.50471
			594.509	2.73948													549.108	2.41522
			595.682	2.75889													550.18	2.42703
			596.854	2.78067													551.252	2.53707
			598.027	2.8035													552.324	2.7261
			599.2	2.82597													553.396	2.96185
			600.372	2.84673													554.468	3.20441
			601.545	2.86452													555.541	3.41281
			602.718	2.87827													556.613	3.55184
			603.89	2.88711													557.685	3.59779
			605.063	2.89049													558.757	3.54236
			606.236	2.88814													559.829	3.39401
			607.408	2.88015													560.901	3.17653
			608.581	2.86689													561.973	2.92505
			609.754	2.84906													563.045	2.68027
			610.926	2.8276													564.117	2.48166
			612.099	2.80365													565.189	2.36101
			613.272	2.77851													566.261	2.33717
			614.444	2.75351													567.333	2.41295
			615.617	2.72998													568.405	2.57472
			616.79	2.70917													569.477	2.79468
			617.962	2.69216													570.55	3.03548
			619.135	2.67981													571.622	3.25639
			620.308	2.67273													572.694	3.42008
			621.48	2.67119													573.766	3.49871
			622.653	2.67519													574.838	3.47855
			623.826	2.68438													575.91	3.36222
			624.999	2.69814													576.982	3.16819
			626.171	2.71559													578.054	2.92773
			627.344	2.73563													579.126	2.67971
			628.517	2.75703													580.198	2.46415
			629.689	2.77849													581.27	2.31564
			630.862	2.7987													582.342	2.25764
			632.035	2.81645													583.414	2.29858
			633.207	2.83065													584.486	2.43058
			634.38	2.84043													585.559	2.63071
			635.553	2.84516													586.631	2.86485
			636.725	2.84452													587.703	3.09333
			637.898	2.83848													588.775	3.27752
			639.071	2.82732													589.847	3.38614
			640.243	2.81162													590.919	3.40049
			641.416	2.79219													591.991	3.31744
			642.589	2.77007													593.063	3.14997
			643.761	2.74646													594.135	2.92495
			644.934	2.72259													595.207	2.67871
			646.107	2.69976													596.279	2.45099
			647.279	2.67916													597.351	2.2784
			648.452	2.66187													598.423	2.18836
			649.625	2.64878													599.495	2.19463
			650.797	2.64052													600.568	2.295
			651.97	2.63747													601.64	2.47177
			653.143	2.63969													602.712	2.69463
			654.315	2.64694													603.784	2.92575
			655.488	2.65873													604.856	3.12598
			656.661	2.67426													605.928	3.26139
			657.833	2.69258													607	3.3088
			659.006	2.71254													608.072	3.2596
			660.179	2.73292													609.144	3.12116
			661.351	2.75249													610.216	2.91556
			662.524	2.77006													611.288	2.67592
			663.697	2.78455													612.36	2.44091
			664.869	2.79508													613.432	2.24837
			666.042	2.80098													614.505	2.12902
			667.215	2.80186													615.577	2.10145
			668.387	2.79761													616.649	2.16906
			669.56	2.78841													617.721	2.31952
			670.733	2.77472													618.793	2.52686
			671.905	2.75726													619.865	2.75575
			673.078	2.73695													620.937	2.96741
			674.251	2.71487													622.009	3.12595
			675.423	2.6922													623.081	3.20434
			676.596	2.67015													624.153	3.18884
			677.769	2.64989													625.225	3.08124
			678.941	2.63247													626.297	2.89851
			680.114	2.6188													627.369	2.67002
			681.287	2.60956													628.441	2.43261
			682.459	2.60516													629.514	2.22452
			683.632	2.60575													630.586	2.07908
			684.805	2.61121													631.658	2.01918
			685.977	2.62113													632.73	2.05357
			687.15	2.63483													633.802	2.1754
			688.323	2.65145													634.874	2.36341
			689.495	2.66996													635.946	2.58543
			690.668	2.68922													637.018	2.80378
			691.841	2.70805													638.09	2.98144
			693.014	2.72531													639.162	3.08818
			694.186	2.73995													640.234	3.10557
			695.359	2.75106													641.306	3.02993
			696.532	2.75797													642.378	2.87298
			697.704	2.7602													643.45	2.65981
			698.877	2.75758													644.523	2.42477
			700.05	2.7502													645.595	2.20572
			701.222	2.73841													646.667	2.03783
			702.395	2.72283													647.739	1.94771
			703.568	2.70428													648.811	1.94911
			704.74	2.68374													649.883	2.04064
			705.913	2.6623													650.955	2.20601
			707.086	2.64112													652.027	2.4168
			708.258	2.62131													653.099	2.63713
			709.431	2.6039													654.171	2.82963
			710.604	2.58981													655.243	2.9616
			711.776	2.57974													656.315	3.0104
			712.949	2.57416													657.387	2.96718
			714.122	2.57329													658.459	2.83828
			715.294	2.57709													659.532	2.64418
			716.467	2.58524													660.604	2.41608
			717.64	2.59719													661.676	2.19075
			718.812	2.61217													662.748	2.00438
			719.985	2.62923													663.82	1.8867
			721.158	2.64732													664.892	1.85601
			722.33	2.66534													665.964	1.91622
			723.503	2.68219													667.036	2.05623
			724.676	2.69684													668.108	2.25176
			725.848	2.70839													669.18	2.46946
			727.021	2.71613													670.252	2.67236
			728.194	2.71955													671.324	2.82602
			729.366	2.7184													672.396	2.9042
			730.539	2.71269													673.468	2.89316
			731.712	2.7027													674.541	2.79395
			732.884	2.68892													675.613	2.62215
			734.057	2.67207													676.685	2.40531
			735.23	2.65306													677.757	2.17833
			736.402	2.63289													678.829	1.97774
			737.575	2.61263													679.901	1.83563
			738.748	2.59337													680.973	1.77435
			739.92	2.5761													682.045	1.8029
			741.093	2.56173													683.117	1.91539
			742.266	2.55098													684.189	2.0921
			743.438	2.54438													685.261	2.30276
			744.611	2.5422													686.333	2.51154
			745.784	2.54448													687.405	2.68302
			746.956	2.55098													688.477	2.78798
			748.129	2.56126													689.55	2.80827
			749.302	2.57464													690.622	2.73975
			750.474	2.59027													691.694	2.59294
			751.647	2.60717													692.766	2.39128
			752.82	2.62432													693.838	2.1672
			753.992	2.64067													694.91	1.95678
			755.165	2.65521													695.982	1.79376
			756.338	2.66705													697.054	1.70399
			757.511	2.67547													698.126	1.70117
			758.683	2.67992													699.198	1.78462
			759.856	2.6801													700.27	1.93942
			761.029	2.67593													701.342	2.1389
			762.201	2.66761													702.414	2.34908
			763.374	2.65554													703.486	2.53426
			764.547	2.64035													704.559	2.66297
			765.719	2.62284													705.631	2.71312
			766.892	2.60395													706.703	2.67563
			768.065	2.58467													707.775	2.55591
			769.237	2.56603													708.847	2.37294
			770.41	2.54901													709.919	2.1561
			771.583	2.53449													710.991	1.94031
			772.755	2.52322													712.063	1.76023
			773.928	2.51574													713.135	1.64455
			775.101	2.51239													714.207	1.6113
			776.273	2.51328													715.279	1.66483
			777.446	2.51826													716.351	1.79517
			778.619	2.52695													717.423	1.9797
			779.791	2.53879													718.495	2.18688
			780.964	2.553													719.568	2.38151
			782.137	2.56871													720.64	2.53054
			783.309	2.58494													721.712	2.60852
			784.482	2.60071													722.784	2.60176
			785.655	2.61503													723.856	2.51062
			786.827	2.62705													724.928	2.34937
			788	2.636													726	2.14384
			789.173	2.64134													727.072	1.92711
			790.345	2.64269													728.144	1.73403
			791.518	2.63993													729.216	1.5955
			792.691	2.63316													730.288	1.53333
			793.863	2.62271													731.36	1.55668
			795.036	2.60911													732.432	1.66059
			796.209	2.59308													733.505	1.8268
			797.381	2.57547													734.577	2.0268
			798.554	2.5572													735.649	2.22656
			799.727	2.53926													736.721	2.39218
			800.899	2.52258													737.793	2.49546
			802.072	2.50804													738.865	2.51854
			803.245	2.49637													739.937	2.45684
			804.417	2.48816													741.009	2.31981
			805.59	2.48379													742.081	2.1293
			806.763	2.48341													743.153	1.91594
			807.935	2.48697													744.225	1.71407
			809.108	2.49418													745.297	1.55609
			810.281	2.50454													746.369	1.46705
			811.453	2.51737													747.441	1.4606
			812.626	2.53188													748.514	1.5367
			813.799	2.54716													749.586	1.6817
			814.971	2.56227													750.658	1.87061
			816.144	2.57629													751.73	2.07122
			817.317	2.58836													752.802	2.24948
			818.489	2.59773													753.874	2.3751
			819.662	2.60381													754.946	2.42654
			820.835	2.6062													756.018	2.39454
			822.008	2.60471													757.09	2.28366
			823.18	2.59938													758.162	2.11145
			824.353	2.59045													759.234	1.90558
			825.526	2.57837													760.306	1.69919
			826.698	2.56378													761.378	1.52545
			827.871	2.54744													762.45	1.41209
			829.044	2.53022													763.523	1.37678
			830.216	2.51303													764.595	1.4243
			831.389	2.49678													765.667	1.54573
			832.562	2.48231													766.739	1.71998
			833.734	2.47037													767.811	1.91727
			834.907	2.46156													768.883	2.1041
			836.08	2.4563													769.955	2.24874
			837.252	2.45479													771.027	2.32653
			838.425	2.45705													772.099	2.32387
			839.598	2.46286													773.171	2.24048
			840.77	2.4718													774.243	2.08941
			841.943	2.4833													775.315	1.89487
			843.116	2.49662													776.387	1.68817
			844.288	2.51092													777.459	1.50259
			845.461	2.52533													778.532	1.36785
			846.634	2.53897													779.604	1.30521
			847.806	2.55098													780.676	1.32398
			848.979	2.56064													781.748	1.42002
			850.152	2.56733													782.82	1.57646
			851.324	2.57063													783.892	1.76645
			852.497	2.57029													784.964	1.95771
			853.67	2.56628													786.036	2.11779
			854.842	2.55877													787.108	2.21946
			856.015	2.54815													788.18	2.2452
			857.188	2.53495													789.252	2.19005
			858.36	2.51987													790.324	2.06244
			859.533	2.50371													791.396	1.88271
			860.706	2.48732													792.468	1.67981
			861.878	2.47157													793.541	1.48642
			863.051	2.45727													794.613	1.33359
			864.224	2.44518													795.685	1.24563
			865.396	2.43589													796.757	1.23607
			866.569	2.42985													797.829	1.30549
			867.742	2.42734													798.901	1.44141
			868.914	2.4284													799.973	1.62041
			870.087	2.43291													801.045	1.81202
			871.26	2.44052													802.117	1.98374
			872.432	2.45072													803.189	2.10642
			873.605	2.46286													804.261	2.15907
			874.778	2.47618													805.333	2.13233
			875.95	2.48984													806.405	2.02994
			877.123	2.50302													807.477	1.86813
			878.296	2.51489													808.55	1.67291
			879.468	2.52473													809.622	1.47577
			880.641	2.53192													810.694	1.30842
			881.814	2.53599													811.766	1.19762
			882.986	2.53668													812.838	1.16071
			884.159	2.53388													813.91	1.20284
			885.332	2.5277													814.982	1.31605
			886.505	2.51845													816.054	1.4807
			887.677	2.50659													817.126	1.66869
			888.85	2.49275													818.198	1.84814
			890.023	2.47766													819.27	1.98861
			891.195	2.4621													820.342	2.06622
			892.368	2.44691													821.414	2.06746
			893.541	2.43287													822.486	1.9915
			894.713	2.42072													823.559	1.85024
			895.886	2.41106													824.631	1.66634
			897.059	2.40438													825.703	1.46946
			898.231	2.40098													826.775	1.29134
			899.404	2.40096													827.847	1.16055
			900.577	2.40426													828.919	1.09781
			901.749	2.41061													829.991	1.11255
			902.922	2.41956													831.063	1.20139
			904.095	2.43055													832.135	1.34872
			905.267	2.44288													833.207	1.52933
			906.44	2.45576													834.279	1.71256
			907.613	2.46842													835.351	1.86738
			908.785	2.48007													836.423	1.96751
			909.958	2.48999													837.495	1.99577
			911.131	2.49756													838.568	1.94688
			912.303	2.5023													839.64	1.82831
			913.476	2.50389													840.712	1.65902
			914.649	2.50219													841.784	1.4663
			915.821	2.49724													842.856	1.28126
			916.994	2.48929													843.928	1.13367
			918.167	2.47872													845	1.04708
			919.339	2.46609													846.072	1.0349
			920.512	2.45206													847.144	1.09824
			921.685	2.43736													848.216	1.22574
			922.857	2.42278													849.288	1.39547
			924.03	2.40908													850.36	1.57859
			925.203	2.39696													851.432	1.74409
			926.375	2.38704													852.505	1.86396
			927.548	2.37982													853.577	1.91777
			928.721	2.37564													854.649	1.89603
			929.893	2.37465													855.721	1.80178
			931.066	2.37683													856.793	1.64999
			932.239	2.38199													857.865	1.46511
			933.411	2.38976													858.937	1.27703
			934.584	2.39963													860.009	1.11607
			935.757	2.41096													861.081	1.00804
			936.929	2.42305													862.153	0.96994
			938.102	2.43515													863.225	1.00722
			939.275	2.4465													864.297	1.11284
			940.447	2.45641													865.369	1.26853
			941.62	2.46426													866.441	1.44777
			942.793	2.46955													867.514	1.62022
			943.965	2.47194													868.586	1.75672
			945.138	2.47123													869.658	1.83412
			946.311	2.46742													870.73	1.83907
			947.483	2.46068													871.802	1.77021
			948.656	2.45134													872.874	1.63838
			949.829	2.43988													873.946	1.46477
			951.001	2.4269													875.018	1.27747
			952.174	2.41308													876.09	1.10673
			953.347	2.39916													877.162	0.98003
			954.52	2.38584													878.234	0.91752
			955.692	2.37384													879.306	0.92871
			956.865	2.36377													880.378	1.01093
			958.038	2.35612													881.45	1.14979
			959.21	2.35126													882.523	1.32158
			960.383	2.34939													883.595	1.49721
			961.556	2.35056													884.667	1.64701
			962.728	2.35461													885.739	1.74565
			963.901	2.36125													886.811	1.77629
			965.074	2.37003													887.883	1.73337
			966.246	2.38039													888.955	1.62347
			967.419	2.39166													890.027	1.46423
			968.592	2.40315													891.099	1.2814
			969.764	2.41415													892.171	1.10456
			970.937	2.42397													893.243	0.96226
			972.11	2.43201													894.315	0.87729
			973.282	2.43775													895.387	0.86291
			974.455	2.44082													896.459	0.92072
			975.628	2.441													897.532	1.0404
			976.8	2.43823													898.604	1.20144
			977.973	2.43263													899.676	1.37653
			979.146	2.42445													900.748	1.53613
			980.318	2.41413													901.82	1.65329
			981.491	2.40219													902.892	1.70815
			982.664	2.38925													903.964	1.69117
			983.836	2.37601													905.036	1.60469
			985.009	2.36315													906.108	1.46253
			986.182	2.35134													907.18	1.28766
			987.354	2.34119													908.252	1.10843
			988.527	2.3332													909.324	0.95382
			989.7	2.32777													910.396	0.84872
			990.872	2.32514													911.468	0.80979
			992.045	2.32537													912.541	0.84271
			993.218	2.3284													913.613	0.94133
			994.39	2.33397													914.685	1.08862
			995.563	2.3417													915.757	1.2596
			996.736	2.3511													916.829	1.42541
			997.908	2.36155													917.901	1.5581
			999.081	2.37241													918.973	1.63526
			1000.25	2.383													920.045	1.64371
			1001.43	2.39266													921.117	1.58162
			1002.6	2.4008													922.189	1.45882
			1003.77	2.40689													923.261	1.29514
			1004.94	2.41055													924.333	1.11714
			1006.12	2.41152													925.405	0.95368
			1007.29	2.4097													926.477	0.83114
			1008.46	2.40515													927.55	0.76914
			1009.64	2.39808													928.622	0.77722
			1010.81	2.38884													929.694	0.85336
			1011.98	2.37791													930.766	0.98431
			1013.15	2.36587													931.838	1.14779
			1014.33	2.35333													932.91	1.31621
			1015.5	2.34097													933.982	1.46121
			1016.67	2.32941													935.054	1.55838
			1017.84	2.31926													936.126	1.59124
			1019.02	2.31103													937.198	1.55398
			1020.19	2.30513													938.27	1.45237
			1021.36	2.30181													939.342	1.3028
			1022.53	2.30121													940.414	1.12954
			1023.71	2.30328													941.486	0.96073
			1024.88	2.30785													942.559	0.82372
			1026.05	2.31458													943.631	0.74056
			1027.23	2.32304													944.703	0.72434
			1028.4	2.33267													945.775	0.77712
			1029.57	2.34287													946.847	0.88952
			1030.74	2.35301													947.919	1.04238
			1031.92	2.36245													948.991	1.20987
			1033.09	2.37061													950.063	1.36383
			1034.26	2.37697													951.135	1.47837
			1035.43	2.38112													952.207	1.53418
			1036.61	2.38279													953.279	1.52169
			1037.78	2.38183													954.351	1.44262
			1038.95	2.37825													955.423	1.30968
			1040.12	2.37221													956.495	1.14447
			1041.3	2.36402													957.568	0.97384
			1042.47	2.35408													958.64	0.82552
			1043.64	2.34291													959.712	0.72348
			1044.82	2.3311													960.784	0.684
			1045.99	2.31927													961.856	0.71301
			1047.16	2.30802													962.928	0.80512
			1048.33	2.29795													964	0.94454
			1049.51	2.28956													965.072	1.10771
			1050.68	2.28327													966.144	1.26718
			1051.85	2.27936													967.216	1.3962
			1053.02	2.27801													968.288	1.47307
			1054.2	2.27921													969.36	1.48479
			1055.37	2.28283													970.432	1.42912
			1056.54	2.28861													971.505	1.31495
			1057.71	2.29616													972.577	1.16082
			1058.89	2.30498													973.649	0.99184
			1060.06	2.31451													974.721	0.83551
			1061.23	2.32416													975.793	0.71718
			1062.41	2.33333													976.865	0.6559
			1063.58	2.34144													977.937	0.66125
			1064.75	2.34798													979.009	0.73179
			1065.92	2.35254													980.081	0.85534
			1067.1	2.35482													981.153	1.01097
			1068.27	2.35463													982.225	1.17252
			1069.44	2.35194													983.297	1.31291
			1070.61	2.34688													984.369	1.40861
			1071.79	2.33967													985.441	1.44352
			1072.96	2.33068													986.514	1.4116
			1074.13	2.32039													987.586	1.31788
			1075.3	2.30931													988.658	1.17757
			1076.48	2.29804													989.73	1.01355
			1077.65	2.28715													990.802	0.85257
			1078.82	2.27722													991.874	0.72082
			1080	2.26874													992.946	0.63961
			1081.17	2.26214													994.018	0.62188
			1082.34	2.25774													995.09	0.67005
			1083.51	2.25571													996.162	0.77566
			1084.69	2.25611													997.234	0.92081
			1085.86	2.25886													998.306	1.08108
			1087.03	2.26374													999.378	1.22962
			1088.2	2.27041													1000.45	1.34159
			1089.38	2.27843													1001.52	1.39822
			1090.55	2.28729													1002.59	1.38994
			1091.72	2.29642													1003.67	1.3179
			1092.89	2.30527													1004.74	1.19378
			1094.07	2.31327													1005.81	1.03785
			1095.24	2.31992													1006.88	0.87557
			1096.41	2.32481													1007.95	0.73343
			1097.59	2.3276													1009.03	0.63451
			1098.76	2.3281													1010.1	0.59473
			1099.93	2.32623													1011.17	0.62021
			1101.1	2.32207													1012.24	0.70628
			1102.28	2.3158													1013.32	0.8383
			1103.45	2.30773													1014.39	0.99405
			1104.62	2.29828													1015.46	1.14746
			1105.79	2.28795													1016.53	1.2729
			1106.97	2.27726													1017.6	1.34941
			1108.14	2.26677													1018.68	1.36417
			1109.31	2.25703													1019.75	1.31455
			1110.48	2.24854													1020.82	1.2086
			1111.66	2.24171													1021.89	1.06362
			1112.83	2.23688													1022.96	0.90335
			1114	2.23427													1024.04	0.75397
			1115.18	2.23395													1025.11	0.63986
			1116.35	2.23589													1026.18	0.57948
			1117.52	2.23991													1027.25	0.58242
			1118.69	2.24574													1028.32	0.64778
			1119.87	2.25297													1029.4	0.76437
			1121.04	2.26115													1030.47	0.91256
			1122.21	2.26975													1031.54	1.06756
			1123.38	2.27824													1032.61	1.2035
			1124.56	2.28608													1033.68	1.2977
			1125.73	2.29278													1034.76	1.33446
			1126.9	2.29791													1035.83	1.30756
			1128.08	2.30114													1036.9	1.22133
			1129.25	2.30225													1037.97	1.08987
			1130.42	2.30113													1039.05	0.93473
			1131.59	2.2978													1040.12	0.78134
			1132.77	2.29241													1041.19	0.65477
			1133.94	2.28522													1042.26	0.57563
			1135.11	2.2766													1043.33	0.55663
			1136.28	2.267													1044.41	0.60058
			1137.46	2.25691													1045.48	0.69984
			1138.63	2.24686													1046.55	0.83769
			1139.8	2.23736													1047.62	0.99106
			1140.97	2.22891													1048.69	1.1344
			1142.15	2.22193													1049.77	1.24382
			1143.32	2.21675													1050.84	1.30114
			1144.49	2.21362													1051.91	1.29677
			1145.67	2.21265													1052.98	1.23136
			1146.84	2.21385													1054.05	1.11564
			1148.01	2.21708													1055.13	0.9686
			1149.18	2.2221													1056.2	0.81439
			1150.36	2.22857													1057.27	0.67829
			1151.53	2.23607													1058.34	0.58253
			1152.7	2.24413													1059.41	0.54264
			1153.87	2.25222													1060.49	0.56491
			1155.05	2.25985													1061.56	0.64535
			1156.22	2.26653													1062.63	0.77037
			1157.39	2.27184													1063.7	0.91906
			1158.56	2.27544													1064.77	1.06664
			1159.74	2.27708													1065.85	1.18859
			1160.91	2.27663													1066.92	1.26464
			1162.08	2.27407													1067.99	1.28218
			1163.26	2.2695													1069.06	1.23826
			1164.43	2.26315													1070.14	1.14011
			1165.6	2.25534													1071.21	1.00387
			1166.77	2.24647													1072.28	0.85196
			1167.95	2.23699													1073.35	0.70935
			1169.12	2.22739													1074.42	0.5994
			1170.29	2.21818													1075.5	0.54005
			1171.46	2.20983													1076.57	0.54085
			1172.64	2.20275													1077.64	0.6014
			1173.81	2.1973													1078.71	0.71144
			1174.98	2.19373													1079.78	0.85257
			1176.15	2.19218													1080.86	1.00128
			1177.33	2.1927													1081.93	1.13287
			1178.5	2.19518													1083	1.22555

## Sheet: Figure 2
Figure 2a																																															Figure 2b
Frequency (GHz)	FFT intensity
																																															Freq (GHz)	xError	Quality factor
0	0.03843		0	0		0	0.02421		0	0.01686		0	0.0455		0	0.08454		0	0.11854		5.74713	0.03598		0	0.08454		0	0.45124		0	0.03427		0	0.03427		0	0.03104		0	0.0329		0	0.01586				45.5789	0.052	151.305
1.02828	0.86815		1.02564	0.39539		0.59952	0.1484		0.93371	0.27211		1.03093	0.27463		0.93371	0.14533		1.14943	0.53692		6.89655	0.07194		0.93371	0.14533		0.60277	0.57014		0.9311	0.51865		0.93633	0.51865		0.93633	0.46346		0.93633	0.54334		0.93371	0.26732				45.6413	0.03335	204.325
2.05656	0.35013		2.05128	0.17361		1.19904	0.22243		1.86741	0.35414		2.06186	0.2814		1.86741	0.23101		2.29885	0.47469		8.04598	0.02831		1.86741	0.23101		1.20554	0.23164		1.8622	0.41702		1.87266	0.41702		1.87266	0.38668		1.87266	0.45191		1.86741	0.1862				45.6204	0.02499	156.904
3.08483	0.15144		3.07692	0.06041		1.79856	0.28513		2.80112	0.21744		3.09278	0.24403		2.80112	0.22603		3.44828	0.23055		9.1954	0.0437		2.80112	0.22603		1.80831	0.18012		2.7933	0.32529		2.80899	0.32529		2.80899	0.23241		2.80899	0.35421		2.80112	0.12189				45.5373	0.04567	169.812
4.11311	0.18185		4.10256	0.15792		2.39808	0.20406		3.73483	0.09692		4.12371	0.13745		3.73483	0.098		4.5977	0.15901		10.3448	0.04064		3.73483	0.098		2.41109	0.17266		3.72439	0.24742		3.74532	0.24742		3.74532	0.16813		3.74532	0.2597		3.73483	0.05868				70.6215	0.12991	140.662
5.14139	0.118		5.12821	0.12748		2.9976	0.22177		4.66853	0.10762		5.15464	0.05257		4.66853	0.10624		5.74713	0.1068		11.4942	0.08027		4.66853	0.22836		3.01386	0.09631		4.65549	0.17588		4.68165	0.17588		4.68165	0.14929		4.68165	0.13867		4.66853	0.05665				59.3824	0.10952	160.328
6.16967	0.05492		6.15385	0.07099		3.59712	0.04675		5.60224	0.09501		6.18557	0.05474		5.60224	0.02993		6.89655	0.0829		12.6437	0		5.60224	0.16976		3.61663	0.08557		5.58659	0.1488		5.61798	0.07036		5.61798	0.10922		5.61798	0.06182		5.60224	0.03176				45.5996	0.05204	225.194
7.19794	0.1018		7.17949	0.11099		4.19664	0.22753		6.53595	0.03636		7.21649	0.05011		6.53595	0.03355		8.04598	0.08261		13.7931	0.10177		6.53595	0.01968		4.2194	0.01788		6.51769	0.10536		6.55431	0.06858		6.55431	0.10812		6.55431	0.11664		6.53595	0.03704				44.2087	0.05871	219.717
8.22622	0.00872		8.20513	0.11043		4.79616	0.03944		7.46965	0.0854		8.24742	0.042		7.46965	0.02236		9.1954	0.05409		14.9425	0.18478		7.46965	0.01329		4.82218	0.05449		7.44879	0.20059		7.49064	0.04533		7.49064	0.05894		7.49064	0.09272		7.46965	0.05209				42.3012	0.05913	165.452
9.2545	0.15603		9.23077	0.08818		5.39568	0.2007		8.40336	0.08286		9.27835	0.14415		8.40336	0.01634		10.3448	0.07079		16.092	0.11736		8.40336	0.08522		5.42495	0.10227		8.37989	0.24836		8.42697	0.02488		8.42697	0.07547		8.42697	0.11542		8.40336	0.0492				59.3824	0.05294	155.214
10.2828	0.07411		10.2564	0.04259		5.9952	0.10603		9.33707	0.02111		10.3093	0.12994		9.33707	0.01821		11.4942	0.05368		17.2414	0.14882		9.33707	0.02104		6.02772	0.01724		9.31099	0.19369		9.3633	0.01618		9.3633	0.04391		9.3633	0.1284		9.33707	0.02375				43.2713	0.02061	143.01
11.311	0.07657		11.282	0.06132		6.59472	0.10678		10.2708	0.02566		11.3402	0.10649		10.2708	0.01792		12.6437	0.01685		18.3908	0.17246		10.2708	0.0172		6.6305	0.09777		10.2421	0.12833		10.2996	0.03706		10.2996	0.03747		10.2996	0.10272		10.2708	0.03474				38.2555	0.0205	167.536
12.3393	0.08739		12.3077	0.00178		7.19424	0.03263		11.2045	0.03859		12.3711	0.09034		11.2045	0.02327		13.7931	0.02826		19.5402	0.07501		11.2045	0.06822		7.23327	0.05925		11.1732	0.14488		11.236	0.05814		11.236	0.0302		11.236	0.04532		11.2045	0.0268				49.2854	0.05106	152.512
13.3676	0.03884		13.3333	0.00901		7.79376	0.10486		12.1382	0.03334		13.4021	0.10942		12.1382	0.02422		14.9425	0.02748		20.6897	0.15783		12.1382	0.10271		7.83604	0.08342		12.1043	0.13112		12.1723	0.0096		12.1723	0.01661		12.1723	0.0436		12.1382	0.03321				55.1268	0.03041	155.694
14.3959	0.09564		14.359	0.00851		8.39329	0.17457		13.0719	0.02955		14.433	0.04835		13.0719	0.01224		16.092	0.04142		21.8391	0.0299		13.0719	0.08722		8.43881	0.08777		13.0354	0.13736		13.1086	0.0082		13.1086	0.03177		13.1086	0.00791		13.0719	0.03135				33.6247	0.02602	182.01
15.4242	0.07547		15.3846	0.06439		8.99281	0.11811		14.0056	0.03988		15.4639	0.03889		14.0056	0.01834		17.2414	0.04521		22.9885	0.09815		14.0056	0.03602		9.04159	0.1063		13.9665	0.08494		14.0449	0.03627		14.0449	0.03404		14.0449	0.0354		14.0056	0.03249				59.7729	0.03933	129.194
16.4524	0.19586		16.4103	0.02796		9.59233	0.01617		14.9393	0.03647		16.4948	0.05061		14.9393	0.02411		18.3908	0.00746		24.1379	0.22039		14.9393	0.05629		9.64436	0.02817		14.8976	0.11289		14.9813	0.0106		14.9813	0.03618		14.9813	0.02442		14.9393	0.03098				66.6711	0.02226	130.957
17.4807	0.0692		17.4359	0.09356		10.1919	0.10059		15.873	0.01777		17.5258	0.04428		15.873	0.02621		19.5402	0.05605		25.2873	0.11469		15.873	0.08295		10.2471	0.02073		15.8287	0.1118		15.9176	0.00414		15.9176	0.03311		15.9176	0.04771		15.873	0.0428				52.4384	0.0165	129.486
18.509	0.09485		18.4615	0.01561		10.7914	0.08583		16.8067	0.02348		18.5567	0.06429		16.8067	0		20.6897	0.08179		26.4368	0.08974		16.8067	0.04092		10.8499	0.0824		16.7598	0.08871		16.8539	0.02363		16.8539	0.03135		16.8539	0.00592		16.8067	0.01401				49.95	0.04745	173.557
19.5373	0.11929		19.4872	0.02866		11.3909	0.08844		17.7404	0.01072		19.5876	0.02051		17.7404	0.01674		21.8391	0.04951		27.5862	0.06255		17.7404	0.03658		11.4527	0.04221		17.6909	0.06579		17.7903	0.01703		17.7903	0.01488		17.7903	0.02934		17.7404	0.02964				45.0653	0.03252	158.991
20.5656	0.11404		20.5128	0.03683		11.9904	0.06969		18.6741	0.01556		20.6186	0.02366		18.6741	0.02113		22.9885	0.04767		28.7356	0.14875		18.6741	0.0346		12.0555	0.06829		18.622	0.09123		18.7266	0.02603		18.7266	0.01562		18.7266	0.07024		18.6741	0.01993				43.7637	0.03258	135.013
21.5938	0.11548		21.5385	0.01103		12.5899	0.05516		19.6078	0.02621		21.6495	0.02311		19.6078	0.02736		24.1379	0.02989		29.885	0.1062		19.6078	0.02266		12.6582	0.05941		19.5531	0.05279		19.6629	0.01932		19.6629	0.02245		19.6629	0.00716		19.6078	0.02448				62.1891	0.02321	133.244
22.6221	0.20066		22.5641	0.0128		13.1895	0.05493		20.5416	0.02592		22.6804	0.05244		20.5416	0.01973		25.2874	0.01223		31.0345	0.06267		20.5416	0.00101		13.261	0.05389		20.4842	0.07385		20.5993	0.02476		20.5993	0.0258		20.5993	0.03674		20.5416	0.01449				49.1159	0.03621	159.857
23.6504	0.10537		23.5897	0.04217		13.789	0.01316		21.4753	0.0189		23.7113	0.03878		21.4753	0.01729		26.4368	0.03884		32.1839	0.12483		21.4753	0.02708		13.8638	0.03784		21.4153	0.05985		21.5356	0.01878		21.5356	0.01225		21.5356	0.02351		21.4753	0.00952				52.5486	0.04422	160.959
24.6787	0.04533		24.6154	0.02361		14.3885	0.04368		22.409	0.01836		24.7423	0.0682		22.409	0.03198		27.5862	0.03857		33.3333	0.06416		22.409	0.02838		14.4665	0.06424		22.3464	0.05378		22.4719	0.02823		22.4719	0.02898		22.4719	0.02339		22.409	0.00711				52.7983	0.03906	184.78
25.7069	0.12584		25.641	0.06372		14.988	0.05066		23.3427	0.03636		25.7732	0.00562		23.3427	0.01718		28.7356	0.03643		34.4828	0.0323		23.3427	0.01437		15.0693	0.07288		23.2775	0.05997		23.4082	0.01626		23.4082	0.01257		23.4082	0.0327		23.3427	0.01209				57.8035	0.03343	107.504
26.7352	0.13327		26.6667	0.06356		15.5875	0.0891		24.2764	0.01747		26.8041	0.06493		24.2764	0.02181		29.8851	0.03969		35.6322	0.01899		24.2764	0.01186		15.6721	0.04867		24.2086	0.07286		24.3446	0.005		24.3446	0.02234		24.3446	0.03743		24.2764	0.01803				46.62	0.02392	175.9
27.7635	0.08584		27.6923	0.04176		16.187	0.10051		25.2101	0.02593		27.835	0.08857		25.2101	0.04601		31.0345	0.06099		36.7816	0.07045		25.2101	0.00874		16.2749	0.0988		25.1397	0.05979		25.2809	0.01017		25.2809	0.0207		25.2809	0.00222		25.2101	0.02289				63.3312	0.04817	138.079
28.7918	0.16232		28.7179	0.03922		16.7866	0.07362		26.1438	0.04219		28.866	0.07012		26.1438	0.02376		32.1839	0.04675		37.931	0.04503		26.1438	0.02661		16.8776	0.04246		26.0708	0.0547		26.2172	0.00144		26.2172	0.01315		26.2172	0.02985		26.1438	0.01549				53.7345	0.03756	120.532
29.82	0.28741		29.7436	0.06058		17.3861	0.08598		27.0775	0.01262		29.8969	0.04726		27.0775	0.03806		33.3333	0.04998		39.0804	0.06253		27.0775	0.03802		17.4804	0.02684		27.0019	0.05534		27.1536	0.01824		27.1536	0.00279		27.1536	0.03632		27.0775	0.01262				44.0141	0.03296	155.006
30.8483	0.51472		30.7692	0.06935		17.9856	0.1027		28.0112	0.00124		30.9278	0.14909		28.0112	0.02122		34.4828	0.07474		40.2299	0.10726		28.0112	0.03804		18.0832	0.05312		27.933	0.06442		28.0899	0.01159		28.0899	0.00676		28.0899	0.03158		28.0112	0.01976				44.0141	0.0349	158.324
31.8766	1		31.7949	0.08223		18.5851	0.07569		28.9449	0.02231		31.9588	0.0653		28.9449	0.01004		35.6322	0.05735		41.3793	0.11938		28.9449	0.04426		18.6859	0.0736		28.8641	0.0496		29.0262	0.03197		29.0262	0.02072		29.0262	0.02269		28.9449	0.01952				65.0618	0.04236	103.221
32.9049	0.18786		32.8205	0.09583		19.1847	0.06799		29.8786	0.03583		32.9897	0.0349		29.8786	0.02265		36.7816	0.04896		42.5287	0.09676		29.8786	0.03148		19.2887	0.04335		29.7952	0.03026		29.9626	0.0236		29.9626	0.03162		29.9626	0.01882		29.8786	0.03891				45.3309	0.03908	145.687
33.9332	0.16134		33.8462	0.08853		19.7842	0.07851		30.8123	0.04767		34.0206	0.0303		30.8123	0.01297		37.931	0.07483		43.6782	0.07692		30.8123	0.013		19.8915	0.05211		30.7263	0.05257		30.8989	0.01844		30.8989	0.01885		30.8989	0.03404		30.8123	0.00833				64.8929	0.05901	113.758
34.9614	0.09159		34.8718	0.04246		20.3837	0.06398		31.746	0.03421		35.0515	0.07261		31.746	0.04805		39.0805	0.01432		44.8276	0.09752		31.746	0.02185		20.4943	0.02269		31.6574	0.05743		31.8352	0.03532		31.8352	0.03835		31.8352	0.03263		31.746	0.02209				47.824	0.02746	230.872
35.9897	0.02485		35.8974	0.17832		20.9832	0.05852		32.6797	0.00482		36.0825	0.02802		32.6797	0.03512		40.2299	0.02811		45.977	0.03676		32.6797	0.0257		21.097	0.01139		32.5885	0.05522		32.7715	0.01298		32.7715	0.01086		32.7715	0.03676		32.6797	0.00101				47.824	0.02288	203.73
37.018	0.14271		36.9231	0.23626		21.5827	0.06788		33.6135	0.02024		37.1134	0.09649		33.6135	0.08577		41.3793	0.01813		47.1264	0.09292		33.6135	0.00295		21.6998	0.02636		33.5196	0.05591		33.7079	0.01639		33.7079	0.01389		33.7079	0.06699		33.6135	0.01585				43.0478	0.01112	187.441
38.0463	0.00281		37.9487	1		22.1822	0.05174		34.5472	0.02741		38.1443	0.06165		34.5472	0.13525		42.5287	0.04301		48.2759	0.03229		34.5472	0.02515		22.3026	0.04306		34.4507	0.06242		34.6442	0.02225		34.6442	0.02351		34.6442	0.05159		34.5472	0.02551				50.4541	0.01528	168.968
39.0746	0.00616		38.9744	0.4407		22.7818	0.03843		35.4809	0.02744		39.1753	0.04649		35.4809	1		43.6782	0.04072		49.4253	0.04393		35.4809	0.01143		22.9054	0.0845		35.3817	0.02877		35.5805	0.02966		35.5805	0.01583		35.5805	0.0367		35.4809	0.00925				39.1236	0.01378	164.823
40.1028	0.06407		40	0.23097		23.3813	0.03825		36.4146	0.01818		40.2062	0.0385		36.4146	0.1702		44.8276	0.02454		50.5747	0.10208		36.4146	0.00563		23.5081	0.05156		36.3128	0.0628		36.5168	0.02433		36.5168	0.01582		36.5168	0.02319		36.4146	0.03095				38.3289	0.01764	175.563
41.1311	0.04669		41.0256	0.14902		23.9808	0.0705		37.3483	0.01386		41.2371	0.03452		37.3483	0.09225		45.977	0.10581		51.7241	0.09634		37.3483	0.03812		24.1109	0.04501		37.2439	0.03589		37.4532	0.02097		37.4532	0.00589		37.4532	0.03263		37.3483	0.01899				39.0778	0.01375	163.034
42.1594	0.05879		42.0513	0.11692		24.5803	0.05922		38.282	0.01838		42.268	0.04776		38.282	0.06033		47.1264	0.07794		52.8736	0.06094		38.282	0.00853		24.7137	0.03582		38.175	0.04267		38.3895	0.0434		38.3895	0.00851		38.3895	0.04228		38.282	0.02292				41.9287	0.00879	189.022
43.1877	0.11606		43.0769	0.04386		25.1799	0.03976		39.2157	0.01549		43.299	0.02113		39.2157	0.04731		48.2759	0.02439		54.023	0.0374		39.2157	0.02497		25.3164	0.05529		39.1061	0.02906		39.3258	0.0367		39.3258	0.01342		39.3258	0.04485		39.2157	0.01508				62.3053	0.01553	192.215
44.2159	0.05501		44.1026	0.09177		25.7794	0.06039		40.1494	0.03547		44.3299	0.07534		40.1494	0.04432		49.4253	0.04845		55.1724	0.07505		40.1494	0.05198		25.9192	0.02044		40.0372	0.03356		40.2622	0.01004		40.2622	9.1628e-05		40.2622	0.0365		40.1494	0.01032				61.1247	0.01121	187.612
45.2442	0.0547		45.1282	0.05766		26.3789	0.02742		41.0831	0.00613		45.3608	0.04373		41.0831	0.02617		50.5747	0.08714		56.3218	0.0385		41.0831	0.03288		26.522	0.06874		40.9683	0.04405		41.1985	0.02523		41.1985	0.01028		41.1985	0.04795		41.0831	0.03275				57.7701	0.01001	183.849
46.2725	0.15863		46.1538	0.06444		26.9784	0.0309		42.0168	0.01593		46.3918	0.09235		42.0168	0.0339		51.7241	0.03674		57.4713	0.12404		42.0168	0.06057		27.1248	0.03944		41.8994	0.06392		42.1348	0.01418		42.1348	0.03122		42.1348	0.0548		42.0168	0.00603				57.7367	0.02001	164.516
47.3008	0.06442		47.1795	0.07111		27.5779	0.06118		42.9505	0.02716		47.4227	0.15983		42.9505	0.0078		52.8736	0.04481		58.6207	0.13274		42.9505	0.007		27.7275	0.04828		42.8305	0.03503		43.0712	0.02883		43.0712	0.01448		43.0712	0.03498		42.9505	0.03708				64.3087	0.00827	186.071
48.3291	0.13227		48.2051	0.05389		28.1775	0.07498		43.8842	0.02484		48.4536	0.35303		43.8842	0.01224		54.023	0.02203		59.7701	0.0962		43.8842	0.02444		28.3303	0.03272		43.7616	0.05521		44.0075	0.00281		44.0075	0.01436		44.0075	0.01496		43.8842	0.00823				59.0667	0.00698	187.976
49.3573	0.08504		49.2308	0.03126		28.777	0.04091		44.8179	0.03614		49.4845	1		44.8179	0.01047		55.1724	0.06457		60.9195	0.10313		44.8179	0.02091		28.9331	0.04151		44.6927	0.06202		44.9438	0.02113		44.9438	0.01225		44.9438	0.02496		44.8179	0.03849				54.0833	0.00878	176.364
50.3856	0.01019		50.2564	0.04913		29.3765	0.04511		45.7516	0.03073		50.5155	0.19328		45.7516	0.00774		56.3218	0.05944		62.069	0.05936		45.7516	0.04145		29.5359	0.03703		45.6238	0.02722		45.8802	0.01637		45.8802	0.0149		45.8802	0.09018		45.7516	0.01496				55.9597	0.01253	205.689
51.4139	0.01622		51.282	0.06595		29.976	0.08647		46.6853	0.04082		51.5464	0.11232		46.6853	0.01385		57.4713	0.03872		63.2184	0.05776		46.6853	0.0287		30.1386	0.02336		46.5549	0.05197		46.8165	0.0172		46.8165	0.01119		46.8165	0.0794		46.6853	0.000487509				51.6796	0.01069	227.136
52.4422	0.07249		52.3077	0.03794		30.5755	0.08136		47.6191	0.05332		52.5773	0.10493		47.6191	0.02406		58.6207	0.0705		64.3678	0.08193		47.6191	0.02984		30.7414	0.12024		47.486	0.03221		47.7528	0.03665		47.7528	0.00552		47.7528	0.03497		47.6191	0.01475				47.5285	0.00904	209.191
53.4704	0.02054		53.3333	0.03351		31.1751	0.09001		48.5528	0.0554		53.6082	0.06218		48.5528	0.01083		59.7701	0.12614		65.5172	0.04408		48.5528	0.00941		31.3442	0.09324		48.4171	0.05309		48.6891	0.03289		48.6891	0.02193		48.6891	0.05375		48.5528	0.00636				56.4334	0.01274	146.619
54.4987	0.06607		54.359	0.05873		31.7746	0.06287		49.4865	0.08649		54.6392	0.03123		49.4865	0.01749		60.9195	0.25457		66.6667	0.0709		49.4865	0.01326		31.947	0.06919		49.3482	0.06112		49.6255	0.03162		49.6255	0.007		49.6255	0.05451		49.4865	0.01069				75.0751	0.02819	159.202
55.527	0.07145		55.3846	0.04633		32.3741	0.07457		50.4202	0.12446		55.6701	0.06715		50.4202	0.02845		62.069	1		67.8161	0.06472		50.4202	0.04014		32.5497	0.03491		50.2793	0.04855		50.5618	0.02579		50.5618	0.02275		50.5618	0.05966		50.4202	0.02038				56.4334	0.01274	146.619
56.5553	0.04518		56.4103	0.03139		32.9736	0.07244		51.3539	0.21584		56.701	0.04201		51.3539	0.01853		63.2184	0.29385		68.9655	0.16808		51.3539	0.00644		33.1525	0.025		51.2104	0.05432		51.4981	0.04309		51.4981	0.00773		51.4981	0.0755		51.3539	0.01705				60.1685	0.01086	202.446
57.5836	0.05906		57.4359	0.01777		33.5731	0.01087		52.2876	1		57.732	0.06773		52.2876	0.03092		64.3678	0.1296		70.1149	0.15833		52.2876	0.042		33.7553	0.01303		52.1415	0.06237		52.4345	0.04147		52.4345	0.03268		52.4345	0.09582		52.2876	0.02967				45.2694	0.0082	223.566
58.6118	0.05608		58.4615	0.08833		34.1727	0.00444		53.2213	0.29243		58.7629	0.03005		53.2213	0.0063		65.5172	0.04409		71.2644	1		53.2213	0.02487		34.358	0.06747		53.0726	0.04398		53.3708	0.05503		53.3708	0.03153		53.3708	0.1526		53.2213	0.04048				58.1395	0.01352	144.477
59.6401	0.09883		59.4872	0.04213		34.7722	0.01113		54.155	0.14505		59.7938	0.02936		54.155	0.01124		66.6667	0.09332		72.4138	0.27372		54.155	0.01047		34.9608	0.03666		54.0037	0.0494		54.3071	0.03005		54.3071	0.0054		54.3071	0.27892		54.155	0.02546				63.1712	0.01597	142.89
60.6684	0.02803		60.5128	0.02829		35.3717	0.08827		55.0887	0.07108		60.8247	0.03659		55.0887	0.0178		67.8161	0.02134		73.5632	0.10367		55.0887	0.04847		35.5636	0.11614		54.9348	0.0659		55.2435	0.0184		55.2435	0.02298		55.2435	1		55.0887	0.04145				56.4972	0.01596	174.296
61.6967	0.08332		61.5385	0.03699		35.9712	0.03131		56.0224	0.0396		61.8557	0.05082		56.0224	0.01098		68.9655	0.05862		74.7126	0.0876		56.0224	0.06004		36.1664	0.14322		55.8659	0.05199		56.1798	0.02254		56.1798	0.02793		56.1798	0.29435		56.0224	0.06621				68.0735	0.0139	168.307
62.7249	0.0604		62.5641	0.03877		36.5707	0.04729		56.9561	0.04635		62.8866	0.06644		56.9561	0.0277		70.1149	0.03077		75.8621	0.12635		56.9561	0.03513		36.7691	0.05391		56.797	0.06279		57.1161	0.03629		57.1161	0.02565		57.1161	0.12357		56.9561	0.10277				71.4796	0.02556	181.22
63.7532	0.08582		63.5897	0.03779		37.1703	0.09176		57.8898	0.04713		63.9175	0.01826		57.8898	0.01583		71.2644	0.0255		77.0115	0.08763		57.8898	0.0298		37.3719	0.09734		57.7281	0.02382		58.0524	0.04204		58.0524	0.02455		58.0524	0.08165		57.8898	0.16248				55.0964	0.01822	121.51
64.7815	0.05761		64.6154	0.02382		37.7698	0.11994		58.8235	0.03803		64.9484	0.00965		58.8235	0.00456		72.4138	0.01992		78.1609	0.04647		58.8235	0.01661		37.9747	0.12533		58.6592	0.02383		58.9888	0.05281		58.9888	0.03411		58.9888	0.06017		58.8235	1				62.5782	0.02351	180.671
65.8098	0.05434		65.641	0.06124		38.3693	0.01903		59.7572	0.03137		65.9794	0.08454		59.7572	0.01519		73.5632	0.01333		79.3103	0.02031		59.7572	0.00364		38.5774	0.09355		59.5903	0.0368		59.9251	0.07446		59.9251	0.03691		59.9251	0.06413		59.7572	0.17589				58.1058	0.02702	107.154
66.838	0.0273		66.6667	0.07296		38.9688	0.04477		60.6909	0.03456		67.0103	0.03864		60.6909	0.01233		74.7126	0.06978		80.4598	0.0599		60.6909	0.03056		39.1802	0.14436		60.5214	0.0364		60.8614	0.07447		60.8614	0.0392		60.8614	0.04711		60.6909	0.09358				57.8369	0.01004	193.51
67.8663	0.08475		67.6923	0.04049		39.5684	0.00721		61.6247	0.01427		68.0412	0.08963		61.6247	0.02801		75.8621	0.01438		81.6092	0.02148		61.6247	0.03817		39.783	0.16017		61.4525	0.04806		61.7978	0.06006		61.7978	0.03204		61.7978	0.0397		61.6247	0.05696				60.7903	0.01109	196.326
68.8946	0.01399		68.718	0.04136		40.1679	0.11632		62.5584	0.02855		69.0722	0.06027		62.5584	0.00902		77.0115	0.01897		82.7586	0.0584		62.5584	0.05082		40.3858	0.13624		62.3836	0.04771		62.7341	0.05674		62.7341	0.03414		62.7341	0.06524		62.5584	0.03748				52.3013	0.01642	129.969
69.9229	0.09668		69.7436	0.08494		40.7674	0.02785		63.4921	0.02325		70.1031	0.05783		63.4921	0.01316		78.1609	0.02039		83.908	0.00796		63.4921	0.04535		40.9885	0.35168		63.3147	0.06879		63.6704	0.14561		63.6704	0.03777		63.6704	0.00289		63.4921	0.03935				62.7746	0.01577	197.212
70.9512	0.02938		70.7692	0.02724		41.3669	0.12712		64.4258	0.03036		71.134	0.04211		64.4258	0.00873		79.3103	0.06247		85.0575	0.08167		64.4258	0.05954		41.5913	1		64.2458	0.06122		64.6067	0.16255		64.6067	0.03465		64.6067	0.03283		64.4258	0.04213				69.9301	0.01957	168.504
71.9794	0.07959		71.7949	0.00942		41.9664	0.06901		65.3595	0.03014		72.165	0.03728		65.3595	0.02757		80.4598	0.0658		86.2069	0.07122		65.3595	0.05569		42.1941	0.74259		65.1769	0.04595		65.5431	0.35719		65.5431	0.0504		65.5431	0.03121		65.3595	0.02287				71.1744	0.02027	173.962
73.0077	0.07093		72.8205	0.03815		42.566	0.05581		66.2932	0.00331		73.1959	0.07073		66.2932	0.03197		81.6092	0.02972		87.3563	0.04016		66.2932	0.0488		42.7969	0.25953		66.108	0.04618		66.4794	1		66.4794	0.07109		66.4794	0.01901		66.2932	0.03358				61.7284	0.01525	182.484
74.036	0.11502		73.8461	0.03187		43.1655	0.05465		67.2269	0.02438		74.2268	0.02424		67.2269	0.01338		82.7586	0.03438		88.5057	0.00287		67.2269	0.05923		43.3996	0.14695		67.0391	0.04601		67.4157	0.23458		67.4157	0.10928		67.4157	0.02081		67.2269	0.02383				46.7071	0.01309	184.446
75.0643	0.06948		74.8718	0.04094		43.765	0.10736		68.1606	0.01822		75.2577	0.00928		68.1606	0.00914		83.9081	0.05446		89.6552	0.0783		68.1606	0.07166		44.0024	0.16265		67.9702	0.03567		68.3521	0.12557		68.3521	0.15962		68.3521	0.0254		68.1606	0.03866				66.1813	0.01752	165.708
76.0925	0.04782		75.8974	0.04686		44.3645	0.12018		69.0943	0.0091		76.2887	0.04058		69.0943	0.03712		85.0575	0.03086		90.8046	0.08741		69.0943	0.04535		44.6052	0.136		68.9013	0.03813		69.2884	0.10249		69.2884	0.30603		69.2884	0.04231		69.0943	0.02062				57.2738	0.01641	129.73
77.1208	0.01746		76.9231	0.05672		44.964	0.25281		70.028	0.02179		77.3196	0.05095		70.028	0.01995		86.2069	0.01473		91.954	0.03096		70.028	0.0892		45.2079	0.0525		69.8324	0.05586		70.2247	0.05517		70.2247	1		70.2247	0.00856		70.028	0.03641				61.8812	0.01532	190.129
78.1491	0.12211		77.9487	0.05458		45.5635	1		70.9617	0.01423		78.3505	0.07638		70.9617	0.00931		87.3563	0.01642		93.1034	0.04912		70.9617	0.12072		45.8107	0.08876		70.7635	0.04208		71.1611	0.06029		71.1611	0.20075		71.1611	0.01955		70.9617	0.01047				35.3357	0.00999	177.728
79.1774	0.0657		78.9744	0.06944		46.1631	0.28235		71.8954	0.01285		79.3814	0.08177		71.8954	0.0074		88.5058	0.02229		94.2529	0.08385		71.8954	0.13697		46.4135	0.06289		71.6946	0.08994		72.0974	0.03332		72.0974	0.0983		72.0974	0.03443		71.8954	0.02347				57.7701	0.01335	169.512
80.2057	0.05871		80	0.05939		46.7626	0.11233		72.8291	0.01622		80.4124	0.02413		72.8291	0.03183		89.6552	0.04444		95.4023	0.06267		72.8291	0.27838		47.0163	0.05007		72.6257	0.08678		73.0337	0.06359		73.0337	0.08484		73.0337	0.04557		72.8291	0.03851				63.2111	0.01199	143.377
81.2339	0.07891		81.0256	0.03514		47.3621	0.11003		73.7628	0.01065		81.4433	0.05982		73.7628	0.0164		90.8046	0.04937		96.5517	0.03275		73.7628	0.37156		47.619	0.04585		73.5568	0.08517		73.97	0.01193		73.97	0.06805		73.97	0.02412		73.7628	0.01551				63.7755	0.0122	165.094
82.2622	0.05764		82.0513	0.02782		47.9616	0.07801		74.6966	0.01731		82.4742	0.03019		74.6966	0.00459		91.954	0.01697		97.7011	0.03883		74.6966	1		48.2218	0.03237		74.4879	0.08131		74.9064	0.03507		74.9064	0.04416		74.9064	0.00821		74.6966	0.02212				53.5619	0.01148	193.173
83.2905	0.00566		83.0769	0.06943		48.5611	0.03954		75.6303	0.01315		83.5052	0.02863		75.6303	0.00929		93.1034	0.03065		98.8506	0.04229		75.6303	0.37406		48.8246	0.05296		75.419	0.13641		75.8427	0.0224		75.8427	0.02951		75.8427	0.01466		75.6303	0.02108				55.0964	0.00911	179.149
84.3188	0.05614		84.1026	0.01249		49.1607	0.06721		76.564	0.00862		84.5361	0.03775		76.564	0.00464		94.2529	0.03953		100	0.04856		76.564	0.21931		49.4274	0.04614		76.3501	0.21461		76.779	0.03012		76.779	0.04393		76.779	0.02187		76.564	0.0097				54.7945	0.01201	210.013
85.347	0.06992		85.1282	0.0616		49.7602	0.05253		77.4977	0.00665		85.567	0.02593		77.4977	0.01511		95.4023	0.03229		101.149	0.06811		77.4977	0.11483		50.0301	0.00223		77.2812	0.37892		77.7154	0.0571		77.7154	0.01817		77.7154	0.00147		77.4977	0.01523				55.0964	0.01215	133.972
86.3753	0.02555		86.1539	0.05659		50.3597	0.02056		78.4314	0.00655		86.5979	0.05743		78.4314	0.01519		96.5517	0.01616		102.299	0.0024		78.4314	0.07206		50.6329	0.01647		78.2123	1		78.6517	0.0306		78.6517	0.02694		78.6517	0.02741		78.4314	0.02231				61.7665	0.01145	183.761
87.4036	0.08772		87.1795	0.06223		50.9592	0.05491		79.3651	0.01436		87.6289	0.02105		79.3651	0.00661		97.7011	0.04932		103.448	0.01261		79.3651	0.09469		51.2357	0.05155		79.1434	0.2411		79.588	0.03014		79.588	0.0128		79.588	0.0088		79.3651	0.02034				61.7284	0.01143	193.344
88.4319	0.04216		88.2051	0.02049		51.5588	0.06346		80.2988	0.01307		88.6598	0.0853		80.2988	0.02198		98.8506	0.04503		104.598	0.0168		80.2988	0.08273		51.8385	0.05302		80.0745	0.11998		80.5243	0.0189		80.5243	0.01622		80.5243	0.04982		80.2988	0.00901				71.3267	0.02036	170.3
89.4601	0.03865		89.2308	0.0293		52.1583	0.07186		81.2325	0.00534		89.6907	0.07743		81.2325	0.00826		100	0.0335		105.747	0.06302		81.2325	0.05016		52.4412	0.02912		81.0056	0.10728		81.4607	0.00241		81.4607	0.02146		81.4607	0.03854		81.2325	0.01423				56.8505	0.0097	176.815
90.4884	0.0571		90.2564	0.05493		52.7578	0.00331		82.1662	0.00639		90.7216	0.06415		82.1662	0.00236		101.149	0.01231		106.897	0.06187		82.1662	0.06245		53.044	0.02813		81.9367	0.09813		82.397	0.03164		82.397	0.03138		82.397	0.00748		82.1662	0.03871				61.237	0.01125	173.528
91.5167	0.04454		91.282	0.06267		53.3573	0.08225		83.0999	0.00563		91.7526	0.04775		83.0999	0.01905		102.299	0.02604		108.046	0.04953		83.0999	0.05031		53.6468	0.04061		82.8678	0.08959		83.3333	0.02687		83.3333	0.01865		83.3333	0.03294		83.0999	0.01493				61.3121	0.01128	205.716
92.545	0.00864		92.3077	0.02678		53.9568	0.05317		84.0336	0.01171		92.7835	0.01419		84.0336	0.00701		103.448	0.03245		109.195	0.13123		84.0336	0.03881		54.2495	0.03023		83.7989	0.07934		84.2697	0.05657		84.2697	0.01221		84.2697	0.00772		84.0336	0.02391				65.6599	0.01725	191.631
93.5733	0.0969		93.3333	0.03077		54.5564	0.05947		84.9673	0.01327		93.8144	0.1162		84.9673	0.01103		104.598	0.02161		110.345	0.0656		84.9673	0.02426		54.8523	0.01681		84.73	0.07236		85.206	0.02253		85.206	0.0146		85.206	0.02067		84.9673	0.02164				51.8135	0.00806	219.586
94.6015	0.03057		94.359	0.02692		55.1559	0.03572		85.901	0.00369		94.8454	0.06005		85.901	0.00955		105.747	0.02791		111.494	0.03801		85.901	0.02223		55.4551	0.03422		85.6611	0.07714		86.1423	0.01723		86.1423	0.01624		86.1423	0.01965		85.901	0.03282				51.8403	0.01075	192.828
95.6298	0.0423		95.3846	0.06927		55.7554	0.08249		86.8347	0.00594		95.8763	0.09868		86.8347	0.000931954		106.897	0.02374		112.644	0.09475		86.8347	0.05482		56.0579	0.03016		86.5922	0.04379		87.0786	0.02424		87.0786	0.00534		87.0786	0.00841		86.8347	0.01889				52.1376	0.01088	225.382
96.6581	0.01226		96.4103	0.04074		56.3549	0.06118		87.7684	0.01721		96.9072	0.03869		87.7684	0.02384		108.046	0.03111		113.793	0.05188		87.7684	0.0374		56.6606	0.0144		87.5233	0.05879		88.015	0.02199		88.015	0.00832		88.015	0.03288		87.7684	0.02166				52.1105	0.01358	187.775
97.6864	0.06589		97.4359	0.01756		56.9544	0.07111		88.7022	0.00455		97.9381	0.03863		88.7022	0.00334		109.195	0.03872		114.943	0.05595		88.7022	0.0237		57.2634	0.05415		88.4544	0.04681		88.9513	0.01298		88.9513	0.00556		88.9513	0.02794		88.7022	0.02515				56.0224	0.01884	150.656
98.7147	0.08366		98.4615	0.06482		57.554	0.06642		89.6359	0.01004		98.9691	0.0699		89.6359	0.00784		110.345	0.01937		116.092	0.05712		89.6359	0.0341		57.8662	0.02368		89.3855	0.07958		89.8876	0.01631		89.8876	0.01771		89.8876	0.03071		89.6359	0.0143				56.1482	0.01577	192.8
99.7429	0.03168		99.4872	0.05847		58.1535	0.03397		90.5696	0.01738		100	0.02939		90.5696	0.00197		111.494	0.04711		117.241	0.0576		90.5696	0.03825		58.4689	0.03363		90.3166	0.05849		90.824	0.01622		90.824	0.01323		90.824	0.02751		90.5696	0.02396				51.6262	0.01066	190.572
100.771	0.04262		100.513	0.03797		58.753	0.01503		91.5033	0.01506		101.031	0.03279		91.5033	0.00954		112.644	0.0196		118.391	0.05636		91.5033	0.04629		59.0717	0.04316		91.2477	0.06072		91.7603	0.0256		91.7603	0.01706		91.7603	0.02855		91.5033	0.0133				57.2738	0.00984	187.848
101.799	0.03305		101.538	0.0459		59.3525	0.03867		92.437	0.00871		102.062	0.0502		92.437	0.02581		113.793	0.02651		119.54	0.06725		92.437	0.02627		59.6745	0.03209		92.1788	0.04716		92.6966	0.02031		92.6966	0.0122		92.6966	0.03907		92.437	0.01243				57.3066	0.01642	206.319
102.828	0.06371		102.564	0.02525		59.952	0.05274		93.3707	0.01846		103.093	0.04613		93.3707	0.02481		114.943	0.06214		120.69	0.00543		93.3707	0.02458		60.2773	0.04481		93.1099	0.03058		93.633	0.01513		93.633	0.00803		93.633	0.00705		93.3707	0.00202				66.269	0.01757	171.549
103.856	0.01172		103.59	0.02544		60.5516	0.059		94.3044	0.00415		104.124	0.07398		94.3044	0.01238		116.092	0.02981		121.839	0.06948		94.3044	0.0444		60.88	0.01599		94.041	0.04326		94.5693	0.02025		94.5693	0.02366		94.5693	0.02052		94.3044	0.00986				58.7544	0.01036	192.335
104.884	0.05641		104.615	0.03766		61.1511	0.04794		95.2381	0.0076		105.155	0.04306		95.2381	0.00801		117.241	0.00354		122.989	0.00582		95.2381	0.01241		61.4828	0.02591		94.9721	0.02844		95.5056	0.01046		95.5056	0.02208		95.5056	0.00762		95.2381	0.00858				59.312	0.01407	203.849
105.913	0.03294		105.641	0.05834		61.7506	0.0048		96.1718	0.00391		106.186	0.02167		96.1718	0.00628		118.391	0.03891		124.138	0.01253		96.1718	0.03645		62.0856	0.03357		95.9032	0.04775		96.442	0.02992		96.442	0.02232		96.442	0.01033		96.1718	0.02837				52.4659	0.00826	201.583
106.941	0.06829		106.667	0.0355		62.3501	0.07117		97.1055	0.00381		107.216	0.08749		97.1055	0.01345		119.54	0.04616		125.287	0.11109		97.1055	0.02409		62.6884	0.0431		96.8343	0.03116		97.3783	0.00827		97.3783	0.01566		97.3783	0.01099		97.1055	0.01621				52.0833	0.01085	211.403
107.969	0.03755		107.692	0.01992		62.9496	0.02932		98.0392	0.00938		108.247	0.01031		98.0392	0.01241		120.69	0.03702		126.437	0.03862		98.0392	0.03804		63.2911	0.03565		97.7654	0.07635		98.3146	0.02362		98.3146	0.00724		98.3146	0.00787		98.0392	0.00665				55.1876	0.01219	205.105
108.997	0.06608		108.718	0.01572		63.5492	0.08592		98.9729	0.01096		109.278	0.05969		98.9729	0.03757		121.839	0.0111		127.586	0.15928		98.9729	0.01713		63.8939	0.04503		98.6965	0.03343		99.2509	0.00291		99.2509	0.01762		99.2509	0.00898		98.9729	0.01701				55.2181	0.01525	154.044
110.026	0		109.744	0.03399		64.1487	0.02617		99.9066	0.00502		110.309	0.07265		99.9066	0.01538		122.989	0.01885		128.736	0.06128		99.9066	0.03878		64.4967	0.03169		99.6276	0.03173		100.187	0.01027		100.187	0.00468		100.187	0		99.9066	0.00462				50.2765	0.01011	193.013
111.054	0.0611		110.769	0.03848		64.7482	0.02846		100.84	0.02165		111.34	0.02343		100.84	0.00513		124.138	0.03035		129.885	0.07802		100.84	0.01069		65.0995	0.07231		100.559	0.02069		101.124	0.00904		101.124	0.00354		101.124	0.02903		100.84	0.01265				49.9251	0.00997	202.329
112.082	0.02268		111.795	0.05385		65.3477	0.0284		101.774	0.00776		112.371	0.05707		101.774	0.01262		125.287	0.00821		131.034	0.01586		101.774	0.02045		65.7022	0.01538		101.49	0.03837		102.06	0.02092		102.06	0.00899		102.06	0.00175		101.774	0.01983				70.0771	0.00982	167.097
113.111	0.03763		112.821	0.03953		65.9472	0.0304		102.708	0.00602		113.402	0.08832		102.708	0.01084		126.437	0.02291		132.184	0.07549		102.708	0.01558		66.305	0.02422		102.421	0.0275		102.996	0.00624		102.996	0.00595		102.996	0.02857		102.708	0.02727				70.0771	0.01965	153.667
114.139	0.15141		113.846	0.03352		66.5468	0.04159		103.641	0.0146		114.433	0.06855		103.641	0.01052		127.586	0.0343		133.333	0.06151		103.641	0		66.9078	0.0209		103.352	0.03051		103.933	0.0211		103.933	0.01994		103.933	0.02621		103.641	0.01829				55.8347	0.01559	134.364
115.167	0.04608		114.872	0.04017		67.1463	0.03798		104.575	0.01495		115.464	0.02697		104.575	0.02101		128.736	0.01584		134.483	0.06034		104.575	0.01965		67.5105	0.02175		104.283	0.02833		104.869	0.01968		104.869	0.01165		104.869	0.01661		104.575	0.01722				60.1685	0.01448	187.324
116.195	0.09674		115.897	0.02342		67.7458	0.03476		105.509	0.00916		116.495	0.0258		105.509	0.01481		129.885	0.01464		135.632	0.03278		105.509	0.0142		68.1133	0.00781		105.214	0.03959		105.805	0.02164		105.805	0.0207		105.805	0.02789		105.509	0.00918				47.9386	0.01379	154.67
117.224	0.02897		116.923	0.00323		68.3453	0.04959		106.443	0.01119		117.526	0.05105		106.443	0.02245		131.034	0.00538		136.782	0.07796		106.443	0.0036		68.7161	0.03851		106.145	0.02392		106.742	0.03194		106.742	0.01417		106.742	0.00475		106.443	0.00105				67.4764	0.01366	168.951
118.252	0.07024		117.949	0.05771		68.9448	0.05747		107.376	0.00804		118.557	0.02961		107.376	0.06136		132.184	0.0515		137.931	0.06089		107.376	0.01523		69.3189	0.01602		107.076	0.04238		107.678	0.00983		107.678	0.01225		107.678	0.00728		107.376	0.00487				42.4809	0.01083	154.41
119.28	0.09717		118.974	0.05992		69.5444	0.01563		108.31	0.01786		119.588	0.024		108.31	0.03968		133.333	0.04149		139.08	0.018		108.31	0.0225		69.9216	0.02319		108.007	0.00468		108.614	0.02183		108.614	0.01551		108.614	0.03125		108.31	0.01011
120.308	0.07899		120	0.02356		70.1439	0.0399		109.244	0.01211		120.619	0.07168		109.244	0.01093		134.483	0.02871		140.23	0.0492		109.244	0.01194		70.5244	0.01398		108.939	0.04137		109.551	0.01309		109.551	0.00788		109.551	0.01047		109.244	0.02057
121.337	0.01518		121.026	0.02233		70.7434	0.02267		110.177	0.00132		121.649	0.02246		110.177	0.00434		135.632	0.01193		141.379	0.0792		110.177	0.00333		71.1272	0.03061		109.87	0.02274		110.487	0.029		110.487	0.01521		110.487	0.00577		110.177	0.01427
122.365	0.02362		122.051	0.02572		71.3429	0.04708		111.111	0.01432		122.68	0.03675		111.111	0.01503		136.782	0.03452		142.529	0.07984		111.111	0.03166		71.73	0.02929		110.801	0.02904		111.423	0.00238		111.423	0.01052		111.423	0.00707		111.111	0.00561
123.393	0.03967		123.077	0.05773		71.9424	0.0581		112.045	0.0052		123.711	0.04063		112.045	0.01022		137.931	0.02219		143.678	0.06821		112.045	0.04194		72.3327	0.03676		111.732	0.03514		112.36	0.03225		112.36	0.01131		112.36	0.00943		112.045	0.02187
124.422	0.02291		124.103	0.04899		72.542	0.05229		112.979	0.00735		124.742	0.05606		112.979	0.01777		139.08	0.01151		144.828	0.06674		112.979	0.00941		72.9355	0.02335		112.663	0.05665		113.296	0.01606		113.296	0.01154		113.296	0.01127		112.979	0.00655
125.45	0.12204		125.128	0.07213		73.1415	0.0851		113.912	0.0087		125.773	0.03469		113.912	0.02112		140.23	0.03513		145.977	0.04829		113.912	0.01291		73.5383	0.01704		113.594	0.03873		114.232	0.03072		114.232	0.00769		114.232	0.02939		113.912	0.02433
126.478	0.01977		126.154	0.05597		73.741	0.03248		114.846	0.0046		126.804	0.03905		114.846	0.01131		141.379	0.01204		147.126	0.06245		114.846	0.00469		74.141	0.04051		114.525	0.03342		115.169	0.01023		115.169	0.02836		115.169	0.01626		114.846	0.02678
127.506	0.03052		127.179	0.05954		74.3405	0.02468		115.78	0.00624		127.835	0.07888		115.78	0.0062		142.529	0.00571		148.276	0.0494		115.78	0.02801		74.7438	0.01047		115.456	0.0406		116.105	0.00255		116.105	0.00622		116.105	0.01248		115.78	0.0144
128.535	0.0323		128.205	0.0305		74.94	0.04379		116.713	0.02089		128.866	0		116.713	0.01378		143.678	0.02953		149.425	0.04767		116.713	0.02643		75.3466	0.02093		116.387	0.03271		117.041	0.01819		117.041	0.01692		117.041	0.0217		116.713	0.01528
129.563	0.00238		129.231	0.02213		75.5396	0.00436		117.647	0.01414		129.897	0.01566		117.647	0.00305		144.828	0.02919		150.575	0.00729		117.647	0.03339		75.9494	0.01726		117.318	0.03695		117.978	0.01449		117.978	0.01852		117.978	0.0393		117.647	0.01521
130.591	0.02418		130.256	0.05129		76.1391	0.0799		118.581	0.00488		130.928	0.02548		118.581	0.00779		145.977	0.02359		151.724	0.0858		118.581	0.02981		76.5521	0.00548		118.25	0.05228		118.914	0.00949		118.914	0.01343		118.914	0.0154		118.581	0.01322
131.62	0.02662		131.282	0.01913		76.7386	0.03848		119.514	0		131.959	0.054		119.514	0.00884		147.126	0.0175		152.874	0.01642		119.514	0.01635		77.1549	0.00788		119.181	0.02921		119.85	0.00804		119.85	0.00609		119.85	0.01959		119.514	0.01835
132.648	0.0808		132.308	0.04234		77.3381	0.00695		120.448	0.00815		132.99	0.04656		120.448	0.01377		148.276	0.02123		154.023	0.057		120.448	0.02222		77.7577	0.03548		120.112	0.0143		120.787	0.01624		120.787	0.01717		120.787	0.01522		120.448	0.01698
133.676	0.06893		133.333	0.03831		77.9377	0.05225		121.382	0.00311		134.021	0.03612		121.382	0.02126		149.425	0.01488		155.172	0.03724		121.382	0.04048		78.3605	0.02391		121.043	0.02996		121.723	0.02788		121.723	0.02684		121.723	0.03655		121.382	0.01594
134.704	0.05643		134.359	0.04522		78.5372	0.07525		122.316	0.00886		135.052	0.01048		122.316	0.01536		150.575	0.03584		156.322	0.01736		122.316	0.0332		78.9632	0.02122		121.974	0.05189		122.659	0.01394		122.659	0.00806		122.659	0.0092		122.316	0
135.733	0.03158		135.385	0.05468		79.1367	0.03176		123.249	0.00585		136.082	0.09857		123.249	0.00469		151.724	0.02237		157.471	0.0124		123.249	0.00922		79.566	0.01824		122.905	0.02579		123.596	0.03027		123.596	0.00719		123.596	0.01136		123.249	0.02331
136.761	0.08599		136.41	0.11236		79.7362	0.0125		124.183	0.00824		137.113	0.03605		124.183	0.000547779		152.874	0.0402		158.621	0.12441		124.183	0.0133		80.1688	0.01875		123.836	0.04758		124.532	0.0316		124.532	0.00904		124.532	0.00902		124.183	0.01091
137.789	0.08225		137.436	0.04974		80.3357	0.05753		125.117	0.00527		138.144	0.02577		125.117	0.02082		154.023	0.03511		159.77	0.06141		125.117	0.02516		80.7715	0.0479		124.767	0.0502		125.468	0.02218		125.468	0.0242		125.468	0.02222		125.117	0.01334
138.817	0.04479		138.462	0.05075		80.9352	0.09412		126.05	0.00681		139.175	0.10172		126.05	0.02542		155.172	0.03669		160.92	0.01373		126.05	0.00291		81.3743	0.02949		125.698	0.01711		126.404	0.01159		126.404	0		126.404	0.02195		126.05	0.00942
139.846	0.05486		139.487	0.02614		81.5348	0.05156		126.984	0.0249		140.206	0.06634		126.984	0.02014		156.322	0.00553		162.069	0.06802		126.984	0.01999		81.9771	0.0272		126.629	0.02322		127.341	0.01152		127.341	0.00405		127.341	0.01716		126.984	0.0136
140.874	0.04799		140.513	0.06196		82.1343	0.06116		127.918	0.00908		141.237	0.00687		127.918	0.02915		157.471	0.04292		163.218	0.03173		127.918	0.02592		82.5799	0.01394		127.561	0.01467		128.277	0.01188		128.277	0.00998		128.277	0.00469		127.918	0.02187
141.902	0.11551		141.538	0.01687		82.7338	0.02466		128.852	0.00174		142.268	0.03091		128.852	0.01146		158.621	0.03248		164.368	0.03571		128.852	0.01069		83.1826	0.01266		128.492	0.03859		129.213	0.01569		129.213	0.02384		129.213	0.03551		128.852	0.00751
142.931	0.01477		142.564	0.06799		83.3333	0		129.785	0.000763896		143.299	0.09418		129.785	0.0183		159.77	0.01905		165.517	0.01695		129.785	0.02619		83.7854	0.04398		129.423	0.02655		130.15	0.01084		130.15	0.00912		130.15	0.01737		129.785	0.00742
143.959	0.07846		143.59	0.05298		83.9329	0.02776		130.719	0.00868		144.33	0.01406		130.719	0.01687		160.92	0.02526		166.667	0.07298		130.719	0.02223		84.3882	0.02073		130.354	0.02739		131.086	0		131.086	0.01537		131.086	0.03047		130.719	0.00614
144.987	0.03234		144.615	0.00967		84.5324	0.00474		131.653	0.01237		145.361	0.02183		131.653	0.00985		162.069	0.01624		167.816	0.00183		131.653	0.01504		84.9909	0.0213		131.285	0.03935		132.022	0.02101		132.022	0.01665		132.022	0.01461		131.653	0.02467
146.015	0.03861		145.641	0.02561		85.1319	0.11564		132.586	0.01749		146.392	0.00478		132.586	0.02041		163.218	0.01266		168.966	0.06879		132.586	0.0234		85.5937	0.01662		132.216	0.02334		132.959	0.01336		132.959	0.0208		132.959	0.02594		132.586	0.00735
147.044	0.16784		146.667	0.02554		85.7314	0.0662		133.52	0.01467		147.423	0.04328		133.52	0.01217		164.368	0.00872		170.115	0.04242		133.52	0.03168		86.1965	0.02066		133.147	0.02645		133.895	0.03048		133.895	0.01036		133.895	0.02574		133.52	0.0144
148.072	0.02571		147.692	0.06329		86.3309	0.01357		134.454	0.00402		148.454	0.07864		134.454	0.0014		165.517	0.01639		171.264	0.07017		134.454	0.00564		86.7993	0.02611		134.078	0.01861		134.831	0.02036		134.831	0.00892		134.831	0.00864		134.454	0.00665
149.1	0.02599		148.718	0.01413		86.9305	0.03399		135.387	0.00758		149.485	0.05092		135.387	0.01767		166.667	0.04868		172.414	0.02061		135.387	0.00694		87.402	0.01506		135.009	0.00902		135.768	0.03106		135.768	0.01152		135.768	0.01746		135.387	0.00539
150.129	0.06637		149.744	0.03521		87.53	0.03835		136.321	0.00258		150.515	0.04903		136.321	0.01407		167.816	0.02379		173.563	0.05057		136.321	0.000334208		88.0048	0.01923		135.94	0.03542		136.704	0.000594333		136.704	0.00443		136.704	0.00573		136.321	0.01079
151.157	0.11511		150.769	0.01286		88.1295	0.03464		137.255	0.00471		151.546	0.03836		137.255	0.03345		168.966	0.00848		174.713	0.05424		137.255	0.0032		88.6076	0.00831		136.872	0.02457		137.64	0.00121		137.64	0.01179		137.64	0.02462		137.255	0.01628
152.185	0.08516		151.795	0.04885		88.729	0.04318		138.189	0.01635		152.577	0.03205		138.189	0.00766		170.115	0.01264		175.862	0.04465		138.189	0.0162		89.2104	0.03996		137.803	0.0352		138.577	0.00963		138.577	0.01071		138.577	0.00418		138.189	0.01065
153.213	0.08585		152.821	0.02524		89.3285	0.03286		139.122	0.00482		153.608	0.03159		139.122	0.01798		171.264	0.02014		177.011	0.04199		139.122	0.03056		89.8131	0.0192		138.734	0.01993		139.513	0.00479		139.513	0.01686		139.513	0.01847		139.122	0.02323
154.242	0.09017		153.846	0.01427		89.9281	0.02063		140.056	0.01344		154.639	0.046		140.056	0.00599		172.414	0.01453		178.161	0.10558		140.056	0.00887		90.4159	0.01077		139.665	0.0258		140.449	0.01286		140.449	0.0039		140.449	0.00729		140.056	0.01504
155.27	0.0435		154.872	0.05273		90.5276	0.04072		140.99	0.01159		155.67	0.04186		140.99	0.00437		173.563	0.01714		179.31	0.04393		140.99	0.00894		91.0187	0.03424		140.596	0.03808		141.386	0.01954		141.386	0.02588		141.386	0.02091		140.99	0.0052
156.298	0.09715		155.897	0.00747		91.1271	0.000763411		141.923	0.00725		156.701	0.0453		141.923	0.01902		174.713	0.00915		180.46	0.02545		141.923	0.00449		91.6214	0.02478		141.527	0.01112		142.322	0.02659		142.322	0.02412		142.322	0.01946		141.923	0.00417
157.326	0.03883		156.923	0.03579		91.7266	0.03496		142.857	0.01176		157.732	0.04323		142.857	0.01317		175.862	0.02264		181.609	0.04166		142.857	0.04899		92.2242	0.00775		142.458	0.02738		143.258	0.04075		143.258	0.01413		143.258	0.04074		142.857	0.01003
158.355	0.07127		157.949	0.0212		92.3261	0.06037		143.791	0.01164		158.763	0.06444		143.791	0.01284		177.011	0.04032		182.759	0.02959		143.791	0.00236		92.827	0.02445		143.389	0.00786		144.195	0.00114		144.195	0.00715		144.195	0.00713		143.791	0.01152
159.383	0.04257		158.974	0.05157		92.9257	0.03601		144.725	0.00626		159.794	0.0231		144.725	0.00159		178.161	0.02962		183.908	0.01893		144.725	0.00883		93.4298	0.03058		144.32	0.01817		145.131	0.01737		145.131	0.01642		145.131	0.01535		144.725	0.01705
160.411	0.06189		160	0.01719		93.5252	0.02595		145.658	0.0194		160.825	0.06131		145.658	0.01348		179.31	0.02073		185.057	0.06881		145.658	0.01238		94.0326	0.01237		145.251	0.0518		146.067	0.02499		146.067	0.02326		146.067	0.01552		145.658	0.00861
161.44	0.06695		161.026	0.03232		94.1247	0.03395		146.592	0.01055		161.856	0.02101		146.592	0.00329		180.46	0.01219		186.207	0.03731		146.592	0.03685		94.6353	0.00666		146.183	0.02866		147.004	0.0018		147.004	0.01227		147.004	0.05071		146.592	0.02363
162.468	0.04775		162.051	0.03877		94.7242	0.03075		147.526	0.01147		162.887	0.06933		147.526	0.01386		181.609	0.01489		187.356	0.07678		147.526	0.02198		95.2381	0.01674		147.114	0.037		147.94	0.00644		147.94	0.00556		147.94	0.01431		147.526	0.0233
163.496	0.04895		163.077	0.06585		95.3237	0.059		148.459	0.00966		163.918	0.03906		148.459	0.01053		182.759	0.03014		188.506	0.08159		148.459	0.00549		95.8409	0.04006		148.045	0.03085		148.876	0.00554		148.876	0.01167		148.876	0.01142		148.459	0.01739
164.524	0.12491		164.103	0.04967		95.9233	0.0547		149.393	0.02457		164.948	0.04299		149.393	0.01542		183.908	0.01755		189.655	0.00164		149.393	0.01972		96.4436	0.03413		148.976	0.02217		149.813	0.02063		149.813	0.02393		149.813	0.01667		149.393	0.0037
165.553	0.0345		165.128	0.03627		96.5228	0.05243		150.327	0.00453		165.979	0.09886		150.327	0.01226		185.057	0.04991		190.805	0.01926		150.327	0.02299		97.0464	0.03669		149.907	0.02036		150.749	0.00698		150.749	0.00893		150.749	0.03401		150.327	0.0093
166.581	0.02296		166.154	0.0318		97.1223	0.02774		151.261	0.01243		167.01	0.07903		151.261	0.01617		186.207	0.014		191.954	0.05679		151.261	0.02225		97.6492	0.028		150.838	0.02249		151.685	0.0182		151.685	0.02859		151.685	0.01628		151.261	0.01172
167.609	0.05985		167.179	0.04049		97.7218	0.07872		152.194	0.00629		168.041	0.04702		152.194	0.01996		187.356	0		193.103	0.06457		152.194	0.01815		98.2519	0.0266		151.769	0.02668		152.622	0.01666		152.622	0.01363		152.622	0.01179		152.194	0.00926
168.638	0.03241		168.205	0.02328		98.3213	0.00881		153.128	0.01213		169.072	0.02251		153.128	0.00503		188.506	0.04551		194.253	0.01127		153.128	0.01263		98.8547	0.01732		152.7	0.03589		153.558	0.01442		153.558	0.02168		153.558	0.00975		153.128	0.01983
169.666	0.05334		169.231	0.04097		98.9209	0.01684		154.062	0.00732		170.103	0.01542		154.062	0.00212		189.655	0.02838		195.402	0.0351		154.062	0.02162		99.4575	0.02271		153.631	0.04123		154.494	0.00693		154.494	0.00654		154.494	0.01709		154.062	0.01339
170.694	0.04266		170.256	0.02971		99.5204	0.10093		154.995	0.00859		171.134	0.07111		154.995	0.0084		190.805	0.01554		196.552	0.05645		154.995	0.01385		100.06	0.02894		154.562	0.000191517		155.431	0.02167		155.431	0.0127		155.431	0.0151		154.995	0.01554
171.722	0.04218		171.282	0.02418		100.12	0.01714		155.929	0.02367		172.165	0.04027		155.929	0.01183		191.954	0.08307		197.701	0.00788		155.929	0.01544		100.663	0.01989		155.493	0.03933		156.367	0.01205		156.367	0.01808		156.367	0.0045		155.929	0.01178
172.751	0.0301		172.308	0.02381		100.719	0.00658		156.863	0.02484		173.196	0.04218		156.863	0.0174		193.103	0.03414		198.851	0.03724		156.863	0.000213906		101.266	0.04448		156.425	0.02151		157.303	0.01967		157.303	0.01068		157.303	0.03677		156.863	0.00908
173.779	0.00658		173.333	0.03696		101.319	0.02682		157.796	0.00981		174.227	0.04118		157.796	0.01237		194.253	0.02534		200	0.03992		157.796	0.03393		101.869	0.00537		157.356	0.02021		158.24	0.01698		158.24	0.01274		158.24	0.01558		157.796	0.01745
174.807	0.0328		174.359	0.03542		101.918	0.0237		158.73	0.00816		175.258	0.04166		158.73	0.00224		195.402	0.0242					158.73	0.02269		102.471	0		158.287	0.01276		159.176	0.01809		159.176	0.01282		159.176	0.01986		158.73	0.00485
175.835	0.06281		175.385	0.03129		102.518	0.06515		159.664	0.00334		176.289	0.06017		159.664	0.02657		196.552	0.03537					159.664	0.00777		103.074	0.00979		159.218	0.02559		160.112	0.01517		160.112	0.02377		160.112	0.01608		159.664	0.00784
176.864	0.03323		176.41	0.06745		103.118	0.09088		160.598	0.00658		177.32	0.08242		160.598	0.01297		197.701	0.000895647					160.598	0.01589		103.677	0.00227		160.149	0.02666		161.049	0.02285		161.049	0.01256		161.049	0.01894		160.598	0.01879
177.892	0.09912		177.436	0.01758		103.717	0.0117		161.531	0.00732		178.351	0.03346		161.531	0.01373		198.851	0.02338					161.531	0.02027		104.28	0.0154		161.08	0.037		161.985	0.00212		161.985	0.00428		161.985	0.00677		161.531	0.00175
178.92	0.00718		178.462	0.04341		104.317	0.07068		162.465	0.0048		179.381	0.06268		162.465	0.00954		200	0.0056					162.465	0.01716		104.882	0.01899		162.011	0.03992		162.921	0.01447		162.921	0.01477		162.921	0.02541		162.465	0.02235
179.949	3.27982e-05		179.487	0.04843		104.916	0.03859		163.399	0.01495		180.412	0.0334		163.399	0.00351								163.399	0.01648		105.485	0.01874		162.942	0.05274		163.858	0.01485		163.858	0.01716		163.858	0.03165		163.399	0.01555
180.977	0.07214		180.513	0.05918		105.516	0.0891		164.332	0.00974		181.443	0.05212		164.332	0.03218								164.332	0.00581		106.088	0.02147		163.873	0.0223		164.794	0.02254		164.794	0.00963		164.794	0.00904		164.332	0.01927
182.005	0.03657		181.538	0.0392		106.115	0.02015		165.266	0.01192		182.474	0.07269		165.266	0.00747								165.266	0.01563		106.691	0.0236		164.804	0.03406		165.73	0.01096		165.73	0.00403		165.73	0.00422		165.266	0.01794
183.033	0.08153		182.564	0.063		106.715	0.03717		166.2	0.01525		183.505	0.00755		166.2	0.01196								166.2	0.02044		107.294	0.00375		165.736	0.0141		166.667	0.00419		166.667	0.01635		166.667	0.02213		166.2	0.00753
184.062	0.07338		183.59	0.0245		107.314	0.08008					184.536	0.03685														107.896	0.02234		166.667	0					--	--
185.09	0.03473		184.615	0.0512		107.914	0.03739					185.567	0.08856														108.499	0.00833
186.118	0.02637		185.641	0.03869		108.513	0.06045					186.598	0.05614														109.102	0.00695
187.147	0.01179		186.667	0.03949		109.113	0.0571					187.629	0.04575														109.705	0.00992
188.175	0.03494		187.692	0.017		109.712	0.0406					188.66	0.04555														110.307	0.01763
189.203	0.05934		188.718	0.01447		110.312	0.0212					189.691	0.01385														110.91	0.00175
190.231	0.04423		189.744	0.05096		110.911	0.00556					190.722	0.03554														111.513	0.02757
191.26	0.14853		190.769	0.05648		111.511	0.02374					191.753	0.07022														112.116	0.00768
192.288	0.06434		191.795	0.01027		112.11	0.04662					192.784	0.06452														112.719	0.01132
193.316	0.08317		192.821	0.07289		112.71	0.06124					193.814	0.03672														113.321	0.01196
194.344	0.03286		193.846	0.01607		113.309	0.04761					194.845	0.05686														113.924	0.02014
195.373	0.06205		194.872	0.03208		113.909	0.0355					195.876	0.07657														114.527	0.01987
196.401	0.08963		195.897	0.01956		114.508	0.02944					196.907	0.04437														115.13	0.00434
197.429	0.05929		196.923	0.01352		115.108	0.03417					197.938	0.05973														115.732	0.02335
198.458	0.16573		197.949	0.00379		115.707	0.03912					198.969	0.05512														116.335	0.00449
199.486	0.10284		198.974	0.02319		116.307	0.05594					200	0.05703														116.938	0.00118
			200	0.01929		116.906	0.05252																				117.541	0.00757
						117.506	0.00919																				118.143	0.01984
						118.106	0.04821																				118.746	0.01189
						118.705	0.05833																				119.349	0.0143
						119.305	0.02744																				119.952	0.01678
						119.904	0.04109																				120.555	0.01505
						120.504	0.04875																				121.157	0.00961
						121.103	0.05863																				121.76	0.00221
						121.703	0.03845																				122.363	0.00577
						122.302	0.04673																				122.966	0.00482
						122.902	0.05067																				123.568	0.01174
						123.501	0.03646																				124.171	0.01756
						124.101	0.02286																				124.774	0.01686
						124.7	0.05379																				125.377	0.01726
						125.3	0.02509																				125.98	0.01535
						125.899	0.01409																				126.582	0.01707
						126.499	0.01705																				127.185	0.00258
						127.098	0.04195																				127.788	0.01592
						127.698	0.04821																				128.391	0.00142
						128.297	0.03431																				128.993	0.01078
						128.897	0.02555																				129.596	0.01777
						129.496	0.03299																				130.199	0.01453
						130.096	0.07255																				130.802	0.00514
						130.695	0.01459																				131.404	0.00304
						131.295	0.05942																				132.007	0.02158
						131.894	0.04348																				132.61	0.01412
						132.494	0.02112																				133.213	0.000537868
						133.094	0.02725																				133.816	0.00721
						133.693	0.06693																				134.418	0.00857
						134.293	0.009																				135.021	0.01543
						134.892	0.02984																				135.624	0.02034
						135.492	0.01367																				136.227	0.00867
						136.091	0.02554																				136.829	0.00514
						136.691	0.03221																				137.432	0.00624
						137.29	0.05461																				138.035	0.01186
						137.89	0.05665																				138.638	0.01263
						138.489	0.02355																				139.24	0.00695
						139.089	0.00333																				139.843	0.0151
						139.688	0.03247																				140.446	0.01276
						140.288	0.05934																				141.049	0.01698
						140.887	0.03152																				141.652	0.01641
						141.487	0.03																				142.254	0.00786
						142.086	0.01457																				142.857	0.01762
						142.686	0.07814																				143.46	0.00632
						143.285	0.0363																				144.063	0.02474
						143.885	0.01083																				144.665	0.00841
						144.484	0.04065																				145.268	0.00948
						145.084	0.03636																				145.871	0.00826
						145.683	0.039																				146.474	0.01845
						146.283	0.06109																				147.077	0.01261
						146.882	0.02987																				147.679	0.00995
						147.482	0.02191																				148.282	0.00854
						148.082	0.03883																				148.885	0.01057
						148.681	0.04813																				149.488	0.01584
						149.281	0.06194																				150.09	0.01215
						149.88	0.0356																				150.693	0.01677
						150.48	0.03238																				151.296	0.01751
						151.079	0.00883																				151.899	0.00406
						151.679	0.0857																				152.501	0.02031
						152.278	0.01784																				153.104	0.00635
						152.878	0.02632																				153.707	0.01039
						153.477	0.03591																				154.31	0.00546
						154.077	0.04395																				154.913	0.01518
						154.676	0.05444																				155.515	0.00264
						155.276	0.07608																				156.118	0.0161
						155.875	0.03578																				156.721	0.00534
						156.475	0.05442																				157.324	0.00854
						157.074	0.03877																				157.926	0.00234
						157.674	0.04385																				158.529	0.000627474
						158.273	0.02171																				159.132	0.01756
						158.873	0.02035																				159.735	0.01093
						159.472	0.04613																				160.338	0.0103
						160.072	0.05506																				160.94	0.00294
						160.671	0.03787																				161.543	0.00499
						161.271	0.0376																				162.146	0.01993
						161.87	0.02997																				162.749	0.01466
						162.47	0.01265																				163.351	0.01303
						163.07	0.04178																				163.954	0.000582099
						163.669	0.03351																				164.557	0.00461
						164.269	0.05182																				165.16	0.00147
						164.868	0.00984																				157.353	0.02473
						165.468	0.04599																				157.954	0.00334
						166.067	0.01953																				158.554	0.03251
						166.667	0.03336																				159.155	0.02053
																											159.755	0.00712
																											160.356	0.01711
																											160.957	0.00903
																											161.557	0.00227
																											162.158	0.01187
																											162.758	0.01063
																											163.359	0.02202
																											163.96	0.00912
																											164.56	0.00732
																											165.161	0.01644
[truncated: 7 more columns]

## Sheet: Figure 3
Figure 3a																Figure 3b
Delay (ps)	Signal (mV)	Delay (ps)	Signal (mV)		Delay (ps)	Signal (mV)	Delay (ps)	Signal (mV)		Delay (ps)	Signal (mV)	Delay (ps)	Signal (mV)			Frequency (GHz)	FFT intensity		Frequency (GHz)	FFT intensity		Frequency (GHz)	FFT intensity
-8	-5.1049	12	5.89809		-8	-5.2768	12	4.91044		-8	-6.9424	15	6.5975			0	0.0196		0	0		0	0.0195
-7	-5.1049	12.7718	5.97702		-7	-5.2768	13.0721	3.93432		-7	-6.887	16.0691	6.50465			0.93371	0.4569		1.29199	0.12149		0.93633	0.62444
-6	-5.1419	13.5435	6.01291		-6	-5.3322	14.1441	4.11458		-6	-6.9424	17.1381	6.24577			1.86741	0.4254		2.58398	0.3836		1.87266	0.73859
-5	-5.0781	14.3153	6.00112		-5	-5.3322	15.2162	4.22436		-5	-7.0078	18.2072	5.85306			2.80112	0.38879		3.87597	0.13501		2.80899	0.43647
-4	-5.1385	15.0871	5.9416		-4	-5.3725	16.2883	4.24565		-4	-6.8567	19.2763	5.37846			3.73483	0.22691		5.16796	0.2211		3.74532	0.25579
-3	-5.1654	15.8589	5.83879		-3	-5.4782	17.3604	4.173		-3	-6.9373	20.3453	4.88595			4.66853	0.26653		6.45995	0.19977		4.68165	0.24883
-2	-5.2258	16.6306	5.70119		-2	-5.4127	18.4324	4.01231		-2	-6.9524	21.4144	4.44224			5.60224	0.11434		7.75194	0.06579		5.61798	0.11015
-1	-4.9438	17.4024	5.54047		-1	-5.4782	19.5045	3.78007		-1	-6.9625	22.4835	4.10699			6.53595	0.05008		9.04393	0.03582		6.55431	0.1105
0	-4.9035	18.1742	5.37039		0	-5.3624	20.5766	3.50135		0	-6.7409	23.5526	3.92411			7.46965	0.05531		10.3359	0.06334		7.49064	0.08203
1	21.052	18.9459	5.20542		1	4.366	21.6486	3.20678		1	-1.464	24.6216	3.91537			8.40336	0.07183		11.6279	0.16403		8.42697	0.06351
2	85.096	19.7177	5.05943		2	48.622	22.7207	2.9289		2	39.348	25.6907	4.07727			9.33707	0.0301		12.9199	0.03686		9.3633	0.08306
3	62.615	20.4895	4.94438		3	47.711	23.7928	2.69824		3	51.146	26.7598	4.3816			10.2708	0.06635		14.2119	0.02174		10.2996	0.06134
6	32.231	21.2613	4.86923		6	28.325	24.8649	2.53967		6	39.383	27.8288	4.77959			11.2045	0.06036		15.5039	0.05409		11.236	0.05256
9	15.547	22.033	4.83914		9	14.296	25.9369	2.46948		9	22.862	28.8979	5.20909			12.1382	0.06413		16.7959	0.17457		12.1723	0.08014
12	6.309	22.8048	4.85507		12	4.905	27.009	2.4934		12	7.872	29.967	5.60364			13.0719	0.09475		18.0879	0.22785		13.1086	0.05119
15	5.651	23.5766	4.91371		15	4.195	28.0811	2.60598		15	6.739	31.036	5.9022			14.0056	0.04369		19.3798	0.76913		14.0449	0.0403
18	5.275	24.3483	5.00792		18	3.883	29.1532	2.79124		18	5.752	32.1051	6.05804			14.9393	0.00641		20.6718	0.19517		14.9813	0.00303
21	4.815	25.1201	5.12737		21	3.379	30.2252	3.02464		21	4.498	33.1742	6.04553			15.873	0.02196		21.9638	0.08032		15.9176	0.01793
24	4.986	25.8919	5.25965		24	2.533	31.2973	3.27599		24	3.99	34.2432	5.86383			16.8067	0.00387		23.2558	0.0238		16.8539	0.03793
27	5.332	26.6637	5.3914		27	2.422	32.3694	3.5131		27	4.604	35.3123	5.53698			17.7404	0.05016		24.5478	0.07092		17.7903	0.02523
30	5.694	27.4354	5.5096		30	2.926	33.4414	3.70562		30	5.485	36.3814	5.1103			18.6741	0.00844		25.8398	0.05196		18.7266	0.01731
33	5.359	28.2072	5.60277		33	3.52	34.5135	3.82867		33	6.145	37.4504	4.64374			19.6078	0.07881		27.1318	0.10783		19.6629	0.02553
36	5.07	28.979	5.66202		36	3.762	35.5856	3.8658		36	5.274	38.5195	4.20311			20.5416	0.01258		28.4238	0.12375		20.5993	0.05246
39	4.724	29.7508	5.68179		39	3.203	36.6577	3.81092		39	3.889	39.5886	3.85042			21.4753	0.04081		29.7158	0.07344		21.5356	0.02869
42	4.892	30.5225	5.66035		42	2.719	37.7297	3.66902		42	3.698	40.6577	3.63487			22.409	0.0296		31.0078	0.04622		22.4719	0.01989
45	5.067	31.2943	5.59982		45	2.312	38.8018	3.45552		45	4.347	41.7267	3.58565			23.3427	0.01451		32.2997	0.1417		23.4082	0.0388
48	4.788	32.0661	5.50589		48	2.609	39.8739	3.19444		48	5.641	42.7958	3.70774			24.2764	0.05958		33.5917	0.09965		24.3446	0.01643
51	4.422	32.8378	5.3872		51	3.394	40.946	2.91547		51	5.848	43.8649	3.98122			25.2101	0.05529		34.8837	0.14993		25.2809	0.03472
54	4.446	33.6096	5.25439		54	4.019	42.018	2.65042		54	4.84	44.9339	4.36422			26.1438	0.09396		36.1757	0.05314		26.2172	0.03214
57	4.61	34.3814	5.1191		57	3.797	43.0901	2.42943		57	3.818	46.003	4.7991			27.0775	0.02334		37.4677	0.11234		27.1536	0.04427
60	4.842	35.1531	4.99278		60	2.896	44.1622	2.27732		60	3.461	47.0721	5.22085			28.0112	0.03187		38.7597	0.08446		28.0899	0.02216
63	4.469	35.9249	4.88556		63	2.246	45.2342	2.2107		63	4.367	48.1411	5.56666			28.9449	0.03817		40.0517	0.08763		29.0262	0.00204
66	4.278	36.6967	4.80539		66	2.231	46.3063	2.23596		66	5.561	49.2102	5.78501			29.8786	0.06712		41.3437	0.04705		29.9626	0.03024
69	4.184	37.4685	4.75723		69	2.735	47.3784	2.34853		69	5.762	50.2793	5.84323			30.8123	0.02347		42.6357	0.08196		30.8989	0.02572
72	4.566	38.2402	4.7427		72	3.465	48.4504	2.53349		72	4.694	51.3484	5.73219			31.746	0.04611		43.9276	0.15817		31.8352	0.02322
75	4.858	39.012	4.75999		75	3.575	49.5225	2.76733		75	3.687	52.4174	5.46759			32.6797	0.01696		45.2196	0.11698		32.7715	0.00554
78	4.67	39.7838	4.80414		78	3.238	50.5946	3.02082		78	3.889	53.4865	5.08764			33.6135	0.04527		46.5116	0.06277		33.7079	0.01516
81	4.1	40.5556	4.86758		81	2.367	51.6667	3.26248		81	4.74	54.5556	4.64738			34.5472	0.000877398		47.8036	0.10763		34.6442	0.03626
84	4.187	41.3273	4.94101		84	2.211	52.7387	3.46239		84	5.782	55.6246	4.21066			35.4809	0.01603		49.0956	0.126		35.5805	0.04609
87	4.523	42.0991	5.0143		87	2.553	53.8108	3.59573		87	5.646	56.6937	3.84076			36.4146	0.02398		50.3876	0.09341		36.5168	0.0178
90	4.785	42.8709	5.07758		90	2.886	54.8829	3.64573		90	4.664	57.7628	3.59117			37.3483	0.02281		51.6796	0.16568		37.4532	0.02277
93	4.724	43.6426	5.12221		93	3.535	55.9549	3.60568		93	3.879	58.8318	3.49778			38.282	0.02278		52.9716	0.20874		38.3895	0.01504
96	4.321	44.4144	5.14163		96	3.414	57.027	3.47968		96	4.146	59.9009	3.57369			39.2157	0.02812		54.2636	0.50715		39.3258	0.01258
99	3.835	45.1862	5.13199		99	2.684	58.0991	3.28216		99	5.45	60.97	3.80732			40.1494	0.05567		55.5556	0.00796		40.2622	0.00946
102	4.033	45.958	5.09249		102	2.206	59.1712	3.03608		102	6.044	62.039	4.16418			41.0831	0.03605		56.8475	0.0345		41.1985	0.03054
105	4.409	46.7297	5.02538		105	2.065	60.2432	2.77019		105	5.51	63.1081	4.59191			42.0168	0.03844		58.1395	0.12213		42.1348	0.03272
108	4.422	47.5015	4.93574		108	2.78	61.3153	2.51559		108	4.438	64.1772	5.028			42.9505	0.03428		59.4315	0.14081		43.0712	0.00904
111	4.09	48.2733	4.83086		111	3.344	62.3874	2.30199		111	3.838	65.2463	5.40892			43.8842	0.02601		60.7235	0.22144		44.0075	0.02858
114	3.58	49.0451	4.71951		114	3.324	63.4595	2.15415		114	4.382	66.3153	5.67939			44.8179	0.05887		62.0155	0.16773		44.9438	0.02406
117	3.606	49.8168	4.61097		117	2.825	64.5315	2.08897		117	5.49	67.3844	5.80042			45.7516	0.06481		63.3075	0.46731		45.8802	0.04477
120	3.992	50.5886	4.51413		120	2.241	65.6036	2.11344		120	6.412	68.4535	5.75503			46.6853	0.0944		64.5995	1		46.8165	0.0476
123	4.268	51.3604	4.43656		123	1.974	66.6757	2.22388		123	5.546	69.5225	5.55059			47.6191	0.09335		65.8915	0.33684		47.7528	0.05779
126	4.204	52.1321	4.38373		126	2.286	67.7477	2.40635		126	4.619	70.5916	5.21778			48.5528	0.11217		67.1835	0.20996		48.6891	0.03008
129	3.888	52.9039	4.35852		129	2.946	68.8198	2.63839		129	4.126	71.6607	4.806			49.4865	0.15181		68.4754	0.13546		49.6255	0.04347
132	3.596	53.6757	4.36094		132	3.611	69.8919	2.8917		132	4.795	72.7297	4.37615			50.4202	0.28463		69.7674	0.06355		50.5618	0.03066
135	4.049	54.4475	4.38814		135	3.324	70.964	3.13554		135	5.868	73.7988	3.99169			51.3539	1		71.0594	0.08766		51.4981	0.07155
138	4.372	55.2192	4.43477		138	2.719	72.036	3.3404		138	6.341	74.8679	3.70938			52.2876	0.46757		72.3514	0.08769		52.4345	0.01747
141	4.086	55.991	4.49353		141	2.201	73.1081	3.48154		141	5.545	75.9369	3.571			53.2213	0.1803		73.6434	0.10606		53.3708	0.06851
144	3.761	56.7628	4.556		144	2.095	74.1802	3.54193		144	4.508	77.006	3.5973			54.155	0.09544		74.9354	0.0225		54.3071	0.09401
147	3.784	57.5345	4.61347		147	2.714	75.2523	3.51426		147	4.246	78.0751	3.78496			55.0887	0.10499		76.2274	0.08784		55.2435	0.13791
150	3.791	58.3063	4.65792		150	3.369	76.3243	3.40181		150	5.223	79.1441	4.10717			56.0224	0.07533		77.5194	0.03486		56.1798	0.20386
153	3.942	59.0781	4.6828		153	3.5	77.3964	3.21798		153	6.442	80.2132	4.51757			56.9561	0.08736		78.8114	0.09219		57.1161	1
156	3.72	59.8499	4.68379		156	3.067	78.4685	2.98473		156	6.89	81.2823	4.95708			57.8898	0.03033		80.1034	0.02695		58.0524	0.26371
159	3.361	60.6216	4.65922		159	2.694	79.5405	2.72988		159	5.656	82.3513	5.36251			58.8235	0.05594		81.3953	0.06397		58.9888	0.09411
162	3.318	61.3934	4.61026		162	2.588	80.6126	2.48381		162	4.971	83.4204	5.67583			59.7572	0.04448		82.6873	0.01135		59.9251	0.09623
165	3.64	62.1652	4.54082		165	2.911	81.6847	2.27579		165	4.906	84.4895	5.85261			60.6909	0.03233		83.9793	0.05019		60.8614	0.06926
168	3.804	62.9369	4.45719		168	3.475	82.7568	2.13049		168	5.747	85.5586	5.86852			61.6247	0.02478		85.2713	0.02037		61.7978	0.03408
171	3.502	63.7087	4.36735		171	3.701	83.8288	2.06506		171	6.548	86.6276	5.72277			62.5584	0.06274		86.5633	0.05937		62.7341	0.03844
174	3.291	64.4805	4.2802		174	3.601	84.9009	2.08709		174	6.835	87.6967	5.43822			63.4921	0.02071		87.8553	0.02644		63.6704	0.02791
177	3.415	65.2523	4.20462		177	3.097	85.973	2.19372		177	5.757	88.7658	5.05802			64.4258	0.02556		89.1473	0.05914		64.6067	0.02799
180	3.821	66.024	4.14858		180	2.503	87.0451	2.37198		180	4.846	89.8348	4.63919			65.3595	0.00287		90.4393	0.04792		65.5431	0.01654
183	3.986	66.7958	4.11825		183	2.694	88.1171	2.60044		183	5.208	90.9039	4.24434			66.2932	0.02112		91.7313	0.03144		66.4794	0.01268
186	3.966	67.5676	4.1174		186	3.087	89.1892	2.85172		186	6.099	91.973	3.93246			67.2269	0.01858		93.0233	0.04134		67.4157	0.01727
189	3.566	68.3393	4.14691		189	3.716	90.2613	3.0958		189	6.638	93.042	3.75034			68.1606	0.05111		94.3153	0.02989		68.3521	0.02139
192	3.438	69.1111	4.20471		192	3.797	91.3333	3.30361		192	6.628	94.1111	3.72578			69.0943	0.01163		95.6072	0.06519		69.2884	0.0137
195	3.657	69.8829	4.28585		195	3.374	92.4054	3.45053		195	5.747	95.1802	3.86352			70.028	0.0038		96.8992	0.05694		70.2247	0.02076
198	3.885	70.6547	4.383		198	2.976	93.4775	3.51929		198	5.097	96.2493	4.14462			70.9617	0.0103		98.1912	0.08267		71.1611	0.00554
201	3.798	71.4264	4.48713		201	2.881	94.5495	3.50201		201	5.485	97.3183	4.52929			71.8954	0.01081		99.4832	0.0663		72.0974	0.01611
204	3.402	72.1982	4.58839		204	3.273	95.6216	3.40114		204	6.507	98.3874	4.96271			72.8291	0.01044		100.775	0.11117		73.0337	0.02953
207	3.291	72.97	4.67705		207	3.867	96.6937	3.22916		207	7.293	99.4565	5.38309			73.7628	0.00844		102.067	0.05721		73.97	0.00931
210	3.156	73.7417	4.74444		210	4.144	97.7658	3.00699		210	6.683	100.526	5.73067			74.6966	0.0266		103.359	0.0977		74.9064	0.0141
213	3.304	74.5135	4.78389		213	3.883	98.8378	2.76155		213	5.777	101.595	5.9565			75.6303	0.03217		104.651	0.05094		75.8427	0.01032
216	3.663	75.2853	4.79134		216	3.344	99.9099	2.5225		216	5.193	102.664	6.02951			76.564	0.02827		105.943	0.05488		76.779	0.02045
219	3.318	76.0571	4.76578		219	2.644	100.982	2.31864		219	5.817	103.733	5.94103			77.4977	0.04752		107.235	0.1059		77.7154	0.00638
222	3.153	76.8288	4.70942		222	3.062	102.054	2.17455		222	6.673	104.802	5.706			78.4314	0.00787		108.527	0.00526		78.6517	0.01635
225	3.163	77.6006	4.62749		225	3.565	103.126	2.10761		225	7.237	105.871	5.36078			79.3651	0.01184		109.819	0.01694		79.588	0.00854
228	3.361	78.3724	4.52775		228	3.973	104.198	2.12594		228	6.603	106.94	4.95773			80.2988	0.01319		111.111	0.04443		80.5243	0.0136
231	3.499	79.1441	4.4198		231	4.109	105.27	2.22747		231	5.631	108.009	4.55757			81.2325	0.01201		112.403	0.01047		81.4607	0.01186
234	3.502	79.9159	4.31414		234	3.394	106.342	2.40022		234	5.51	109.078	4.22051			82.1662	0.01104		113.695	0.0976		82.397	0.01551
237	3.385	80.6877	4.22117		237	3.127	107.414	2.62371		237	6.13	110.147	3.99742			83.0999	0.03243		114.987	0.06455		83.3333	0.01671
240	3.412	81.4595	4.15017		240	3.052	108.486	2.8715		240	7.116	111.216	3.92245			84.0336	0.02816		116.279	0.04318		84.2697	0.00969
243	3.509	82.2312	4.10839		243	3.329	109.559	3.11428		243	7.57	112.285	4.00806			84.9673	0.02659		117.571	0.05909		85.206	0.0175
246	3.519	83.003	4.10035		246	3.797	110.631	3.32346		246	6.618	113.354	4.24324			85.901	0.00498		118.863	0.04639		86.1423	0.01558
249	3.442	83.7748	4.12731		249	4.064	111.703	3.47453		249	5.893	114.423	4.59521			86.8347	0.01515		120.155	0.10791		87.0786	0.01102
252	3.344	84.5465	4.18718		252	3.862	112.775	3.55		252	5.404	115.492	5.01418			87.7684	0.02187		121.447	0.08576		88.015	0.00572
255	3.314	85.3183	4.27461		255	3.233	113.847	3.54148		255	6.24	116.562	5.44071			88.7022	0.01429		122.739	0.03457		88.9513	0.00617
258	3.237	86.0901	4.38149		258	2.896	114.919	3.45064		258	6.991	117.631	5.81438			89.6359	0.02024		124.031	0.04742		89.8876	0.0138
261	3.455	86.8619	4.4977		261	2.876	115.991	3.289		261	7.157	118.7	6.08262			90.5696	0.02818		125.323	0.04482		90.824	0.01789
264	3.153	87.6336	4.612		264	3.5	117.063	3.07653		264	6.356	119.769	6.20838			91.5033	0.0106		126.615	0.0321		91.7603	0.01355
267	2.992	88.4054	4.71312		267	3.963	118.135	2.83923		267	5.566	120.838	6.1755			92.437	0.00426		127.907	0.08193		92.6966	0.01783
270	2.942	89.1772	4.79079		270	3.928	119.207	2.60603		270	5.687	121.907	5.99102			93.3707	0.0174		129.199	0.04381		93.633	0.00341
273	3.009	89.9489	4.83673		273	3.379	120.279	2.40528		273	6.054	122.976	5.68411			94.3044	0.02347		130.491	0.03245		94.5693	0.02014
276	3.281	90.7207	4.84542		276	2.986	121.351	2.26142		276	7.066	124.045	5.30175			95.2381	0.01127		131.783	0.03746		95.5056	0.00101
279	3.13	91.4925	4.81465		279	2.82	122.423	2.19202		279	6.83	125.114	4.90189			96.1718	0.02161		133.075	0.08987		96.442	0.0265
282	2.935	92.2643	4.74575		282	3.163	123.496	2.20573		282	5.893	126.183	4.54487			97.1055	0.01003		134.367	0.04357		97.3783	0.013
285	2.878	93.036	4.64347		285	3.883	124.568	2.30124		285	5.46	127.252	4.28469			98.0392	0.02948		135.659	0.0146		98.3146	0.01906
288	3.193	93.8078	4.51558		288	3.988	125.64	2.46748		288	5.656	128.321	4.16109			98.9729	0.01549		136.951	0.02335		99.2509	0.01472
291	3.331	94.5796	4.37218		291	3.822	126.712	2.68497		291	6.653	129.39	4.1938			99.9066	0.02085		138.243	0.03731		100.187	0.01218
294	3.462	95.3513	4.22473		294	2.986	127.784	2.92815		294	7.101	130.459	4.37968			100.84	0.019		139.535	0.03266		101.124	0.01494
297	3.076	96.1231	4.08505		297	2.881	128.856	3.16845		297	7.041	131.529	4.69323			101.774	0.01883		140.827	0.01248		102.06	0.00306
300	2.898	96.8949	3.96422		300	2.946	129.928	3.37773		300	6.155	132.598	5.09037			102.708	0.01571		142.119	0.07605		102.996	0.01682
303	2.801	97.6667	3.87155		303	3.706	131	3.53164		303	5.5	133.667	5.51491			103.641	0.0061		143.411	0.06445		103.933	0.01476
306	3.019	98.4384	3.81377		306	4.019	132.072	3.61252		306	5.742	134.736	5.90676			104.575	0.01435		144.703	0.04577		104.869	0.00461
309	3.133	99.2102	3.79438		309	3.988	133.144	3.61145		309	6.548	135.805	6.21075			105.509	0.01813		145.995	0.06358		105.805	0.02577
312	2.918	99.982	3.81339		312	3.545	134.216	3.52938		312	7.157	136.874	6.38462			106.443	0.00407		147.287	0.11743		106.742	0.01016
315	2.556	100.754	3.8673		315	2.79	135.288	3.37691		315	6.613	137.943	6.40524			107.376	0.01498		148.579	0.0727		107.678	0.01404
318	2.546	101.526	3.94945		318	2.911	136.36	3.17306		318	6.064	139.012	6.27186			108.31	0.00993		149.871	0.01001		108.614	0.00142
321	2.727	102.297	4.05065		321	3.414	137.432	2.94292		321	5.284	140.081	6.00624			109.244	0.02166		151.163	0.08702		109.551	0.01565
324	2.787	103.069	4.16006		324	3.696	138.505	2.7147		324	5.817	141.15	5.64941			110.177	0.03015		152.455	0.0415		110.487	0.01718
327	2.868	103.841	4.2662		327	4.19	139.577	2.51629		327	6.784	142.219	5.25561			111.111	0.02121		153.747	0.02638		111.423	0.01073
330	2.653	104.613	4.35798		330	3.661	140.649	2.37196		330	7.127	143.288	4.88438			112.045	0.0173		155.039	0.03884		112.36	0.01417
333	2.589	105.384	4.42577		333	3.233	141.721	2.29946		333	6.366	144.357	4.59184			112.979	0.0161		156.331	0.0939		113.296	0.01413
336	2.74	106.156	4.46224		336	2.86	142.793	2.30792		336	5.656	145.426	4.4225			113.912	0.01279		157.623	0.0662		114.232	0.02179
339	2.888	106.928	4.46305		339	3.107	143.865	2.39676		339	5.173	146.495	4.40278			114.846	0.02064		158.915	0.08337		115.169	0.02805
342	2.838	107.7	4.4272		342	3.701	144.937	2.55581		342	5.974	147.565	4.53719			115.78	0.00754		160.207	0.02951		116.105	0.01206
345	2.801	108.471	4.35712		345	4.079	146.009	2.76654		345	6.83	148.634	4.80775			116.713	0.0118		161.499	0.09927		117.041	0.00893
348	2.76	109.243	4.2584		348	3.822	147.081	3.00427		348	7.192	149.703	5.1766			117.647	0.03543		162.791	0.04643		117.978	0.00795
351	2.948	110.015	4.13925		351	3.334	148.153	3.24117		351	6.321	150.772	5.59161			118.581	0.01897		164.083	0.01488		118.914	0.0178
354	2.878	110.787	4.00975		354	2.901	149.225	3.44959		354	5.556	151.841	5.99401			119.514	0.02389		165.375	0.04865		119.85	0.01654
357	2.73	111.559	3.88085		357	3.147	150.297	3.60533		357	5.344	152.91	6.32699			120.448	0.01687		166.667	0.05279		120.787	0.01604
360	2.482	112.33	3.76341		360	3.389	151.369	3.69055		360	5.873	153.979	6.54399			121.382	0.00567					121.723	0.00574
363	2.522	113.102	3.66719		363	3.822	152.441	3.69591		363	6.955	155.048	6.61546			122.316	0.01478					122.659	0.01394
366	2.609	113.874	3.59997		366	3.913	153.514	3.62162		366	6.794	156.117	6.53316			123.249	0.03056					123.596	0.00907
369	2.687	114.646	3.56685		369	3.752	154.586	3.4774		369	5.913	157.186	6.31132			124.183	0.04463					124.532	0.00914
372	2.532	115.417	3.56986		372	3.173	155.658	3.28134		372	5.248	158.255	5.9845			125.117	0.00423					125.468	0.0052
375	2.495	116.189	3.6078		375	2.966	156.73	3.05764		375	5.284	159.324	5.60252			126.05	0.01006					126.404	0.01029
378	2.358	116.961	3.67641		378	3.238	157.802	2.83378		378	6.15	160.393	5.22313			126.984	0.0247					127.341	0.01199
381	2.529	117.733	3.76881		381	3.696	158.874	2.63717		381	7.031	161.462	4.90358			127.918	0.01191					128.277	0.01286
384	2.643	118.504	3.87618		384	3.953	159.946	2.49191		384	6.744	162.532	4.69226			128.852	0.01597					129.213	0.01537
387	2.717	119.276	3.98864		387	3.716	161.018	2.4159		387	5.923	163.601	4.62165			129.785	0.01624					130.15	0.0255
390	2.475	120.048	4.09614		390	3.349	162.09	2.41871		390	5.178	164.67	4.70361			130.719	0.0256					131.086	0.02147
393	2.341	120.82	4.1894		393	2.946	163.162	2.50047		393	5.369	165.739	4.92767			131.653	0.03806					132.022	0.01556
396	2.462	121.592	4.26075		396	2.951	164.234	2.65187		396	6.306	166.808	5.26264			132.586	0.01387					132.959	0.00961
399	2.65	122.363	4.3048		399	3.389	165.306	2.85532		399	6.754	167.877	5.66119			133.52	0.01732					133.895	0.00798
402	2.75	123.135	4.31888		402	3.797	166.378	3.08701		402	6.568	168.946	6.06677			134.454	0.03087					134.831	0.00737
405	2.636	123.907	4.30323		405	3.913	167.45	3.31985		405	5.54	170.015	6.42195			135.387	0.00515					135.768	0.0126
408	2.435	124.679	4.26086		408	3.424	168.523	3.52665		408	5.077	171.084	6.67671			136.321	0.00811					136.704	0.0062
411	2.26	125.45	4.19721		411	3.022	169.595	3.68341		411	5.47	172.153	6.79584			137.255	0.03573					137.64	0.00396
414	2.361	126.222	4.11957		414	2.74	170.667	3.77218		414	6.266	173.222	6.76396			138.189	0.02276					138.577	0.01308
417	2.401	126.994	4.03633		417	3.092	171.739	3.78316		417	6.789	174.291	6.58776			139.122	0.00764					139.513	0.02624
420	2.408	127.766	3.95613		420	3.429	172.811	3.71587		420	6.205	175.36	6.295			140.056	0.00924					140.449	0.01931
423	2.17	128.538	3.88705		423	3.53	173.883	3.57919		423	5.258	176.429	5.93038			140.99	0.00204					141.386	0.02332
426	2.277	129.309	3.83581		426	3.434	174.955	3.39029		426	4.856	177.499	5.54897			141.923	0.02436					142.322	0.01835
429	2.183	130.081	3.80722		429	3.112	176.027	3.1725		429	5.5	178.568	5.2082			142.857	0.01186					143.258	0.00443
432	2.203	130.853	3.80366		432	2.74	177.099	2.95257		432	6.094	179.637	4.95941			143.791	0.03321					144.195	0.02332
435	2.237	131.625	3.82503		435	2.83	178.171	2.75743		435	6.417	180.706	4.8404			144.725	0.02127					145.131	0.01363
438	2.24	132.396	3.86872		438	3.389	179.243	2.61098		438	5.717	181.775	4.86994			145.658	0.02955					146.067	0.00407
441	2.307	133.168	3.93001		441	3.626	180.315	2.53123		441	4.911	182.844	5.04503			146.592	0.02601					147.004	0.02036
444	2.253	133.94	4.00253		444	3.686	181.387	2.52818		444	4.679	183.913	5.34143			147.526	0.0268					147.94	0.00461
447	2.27	134.712	4.07894		447	3.218	182.459	2.60264		447	5.148	184.982	5.71722			148.459	0.02805					148.876	0
450	2.173	135.483	4.15168		450	2.845	183.532	2.74613		450	5.938	186.051	6.11896			149.393	0.01933					149.813	0.02507
453	2.186	136.255	4.21372		453	2.75	184.604	2.94196		453	5.873	187.12	6.4895			150.327	0.01279					150.749	0.01481
456	2.274	137.027	4.25923		456	2.946	185.676	3.16721		456	5.233	188.189	6.77638			151.261	0.01768					151.685	0.01662
459	2.217	137.799	4.28412		459	3.661	186.748	3.3955		459	4.448	189.258	6.93942			152.194	0					152.622	0.01626
462	2.213	138.571	4.2864		462	3.772	187.82	3.60013		462	4.402	190.327	6.9566			153.128	0.00481					153.558	0.00463
465	2.129	139.342	4.26634		465	3.525	188.892	3.75732		465	5.128	191.396	6.82723			154.062	0.02731					154.494	0.01236
468	1.7634	140.114	4.22632		468	3.082	189.964	3.84899		468	5.782	192.465	6.572			154.995	0.01802					155.431	0.00913
471	1.7734	140.886	4.17061		471	2.78	191.036	3.86495		471	5.777	193.535	6.22994			155.929	0.02707					156.367	0.01516
474	1.881	141.658	4.10485		474	2.991	192.108	3.80407		474	4.966	194.604	5.85263			156.863	0.02422					157.303	0.01148
477	1.985	142.429	4.03541		477	3.208	193.18	3.6744		477	4.256	195.673	5.4967			157.796	0.01506					158.24	0.00694
480	1.864	143.201	3.96878		480	3.686	194.252	3.49219		480	4.433	196.742	5.21552			158.73	0.03036					159.176	0.00858
483	1.7164	143.973	3.91085		483	3.424	195.324	3.27995		483	5.233	197.811	5.05142			159.664	0.01436					160.112	0.01573
486	1.6123	144.745	3.86633		486	3.137	196.396	3.06368		486	5.601	198.88	5.02954			160.598	0.01287					161.049	0.01451
489	1.7264	145.517	3.8383		489	2.609	197.468	2.86981		489	5.399	199.949	5.15417			161.531	0.0317					161.985	0.02272
492	2.032	146.288	3.82791		492	2.518	198.541	2.72205		492	4.659	201.018	5.4082			162.465	0.00811					162.921	0.01447
495	2.012	147.06	3.83432		495	2.765	199.613	2.63849		495	4.201	202.087	5.75562			163.399	0.03645					163.858	0.00841
498	1.904	147.832	3.85477		498	3.223	200.685	2.62953		498	4.433	203.156	6.14686			164.332	0.01972					164.794	0.01719
501	1.75	148.604	3.885		501	3.288	201.757	2.69661		501	5.027	204.225	6.52604			165.266	0.00198					165.73	0.00804
504	1.857	149.375	3.91963		504	3.253	202.829	2.83208		504	5.274	205.294	6.83912			166.2	0.02457					166.667	0.01495
507	1.867	150.147	3.95282		507	2.674	203.901	3.02012		507	5.067	206.363	7.04182
510	1.804	150.919	3.9789		510	2.503	204.973	3.23867		510	4.221	207.432	7.10605
513	1.898	151.691	3.99295		513	2.815	206.045	3.46207		513	3.849	208.501	7.02396
516	1.6828	152.462	3.99138		516	2.961	207.117	3.66414		516	4.428	209.571	6.80911
519	1.6191	153.234	3.97228		519	3.168	208.189	3.82129		519	5.032	210.64	6.49434
522	1.6593	154.006	3.93569		522	3.193	209.261	3.91539		522	5.324	211.709	6.12705
525	1.5083	154.778	3.88355		525	2.704	210.333	3.93584		525	4.463	212.778	5.76217
528	1.4277	155.55	3.81956		528	2.417	211.405	3.8809		528	3.904	213.847	5.45414
531	1.5284	156.321	3.7488		531	2.382	212.477	3.75782		531	3.541	214.916	5.24898
534	1.6325	157.093	3.67721		534	2.543	213.55	3.58199		534	4.463	215.985	5.17759
537	1.5553	157.865	3.61096		537	3.057	214.622	3.37504		537	4.956	217.054	5.25123
540	1.5318	158.637	3.55583		540	2.961	215.694	3.16227		540	4.946	218.123	5.45996
543	1.4646	159.408	3.51659		543	2.931	216.766	2.96962		543	4.357	219.192	5.77412
546	1.4042	160.18	3.49653		546	2.624	217.838	2.82054		546	3.713	220.261	6.14868
549	1.4344	160.952	3.49704		549	2.669	218.91	2.73321		549	3.632	221.33	6.52988
552	1.6392	161.724	3.51748		552	2.614	219.982	2.7184		552	4.196	222.399	6.86309
555	1.6123	162.495	3.55522		555	2.986	221.054	2.77815		555	4.82	223.468	7.10075
558	1.4445	163.267	3.60585		558	3.142	222.126	2.90559		558	4.931	224.538	7.20936
561	1.4545	164.039	3.66364		561	3.188	223.198	3.08579		561	4.191	225.607	7.17431
564	1.29	164.811	3.72208		564	2.639	224.27	3.29751		564	3.476	226.676	7.00196
567	1.4512	165.583	3.77454		567	2.302	225.342	3.51582		567	3.426	227.745	6.71872
570	1.4076	166.354	3.81494		570	2.317	226.414	3.71503		570	4.438	228.814	6.36708
573	1.3068	167.126	3.83837		573	2.704	227.486	3.8718		573	5.017	229.883	5.99944
576	1.2363	167.898	3.84162		576	3.142	228.559	3.96794		576	4.735	230.952	5.67041
579	1.0651	168.67	3.82353		579	3.283	229.631	3.99251		579	4.03	232.021	5.42882
582	1.1424	169.441	3.78514		582	2.916	230.703	3.94316		582	3.385	233.09	5.31062
585	1.2867	170.213	3.72963		585	2.402	231.775	3.82637		585	3.506	234.159	5.33365
588	1.243	170.985	3.66206		588	2.145	232.847	3.65667		588	4.352	235.228	5.49507
591	1.0819	171.757	3.58886		591	2.317	233.919	3.45486		591	4.705	236.297	5.77183
594	1.1256	172.529	3.51729		594	2.855	234.991	3.24554		594	4.543	237.366	6.12405
597	1.3001	173.3	3.45467		597	2.986	236.063	3.05412		597	3.833	238.435	6.50091
600	1.4243	174.072	3.40772		600	2.815	237.135	2.90381		600	3.264	239.505	6.84807
603	1.3538	174.844	3.38183		603	2.458	238.207	2.81284		603	3.743	240.574	7.11563
606	1.327	175.616	3.38059		606	2.362	239.279	2.79231		606	4.377	241.643	7.26537
609	1.2061	176.387	3.40531		609	2.367	240.351	2.84486		609	4.674	242.712	7.27637
612	1.2699	177.159	3.45493		612	2.634	241.423	2.96438		612	4.312	243.781	7.14796
615	1.1289	177.931	3.526		615	3.057	242.495	3.13676		615	3.496	244.85	6.89983
618	1.1625	178.703	3.61303		618	3.112	243.568	3.34161		618	3.254	245.919	6.56908
621	1.1961	179.474	3.70891		621	2.931	244.64	3.55469		621	3.833	246.988	6.20479
624	1.1994	180.246	3.8056		624	2.397	245.712	3.75085		624	4.327	248.057	5.86082
627	1.0517	181.018	3.89483		627	2.231	246.784	3.90701		627	4.503	249.126	5.58791
630	1.1356	181.79	3.96887		630	2.513	247.856	4.0049		630	4.387	250.195	5.42633
633	1.0651	182.562	4.02127		633	2.951	248.928	4.03328		633	3.36	251.264	5.39998
636	0.8772	183.333	4.04745		636	3.032	250	3.98924		636	3.31	252.333	5.51295
639	0.7731	184.105	4.04516		639	2.936	251.072	3.87851		639	3.667	253.402	5.74896
642	0.9779	184.877	4.01468		642	2.473	252.144	3.71478		642	4.483	254.471	6.07376
645	1.0081	185.649	3.95883		645	2.075	253.216	3.51804		645	4.387	255.541	6.44023
648	1.045	186.42	3.8827		648	2.216	254.288	3.31216		648	3.964	256.61	6.79519
651	1.0148	187.192	3.79323		651	2.609	255.36	3.12205		651	3.159	257.679	7.08728
654	0.9208	187.964	3.69852		654	2.795	256.432	2.97066		654	3.108	258.748	7.27437
657	0.9846	188.736	3.60714		657	2.785	257.505	2.87625		657	3.743	259.817	7.32974
660	1.139	189.508	3.52732		660	2.422	258.577	2.85021		660	4.201	260.886	7.24596
663	1.2901	190.279	3.46615		663	2.211	259.649	2.89576		663	4.045	261.955	7.03589
666	1.1121	191.051	3.42901		666	2.014	260.721	3.0075		666	3.365	263.024	6.73079
669	1.1021	191.823	3.41897		669	2.397	261.793	3.17216		669	3.088	264.093	6.37573
672	0.9745	192.595	3.43659		672	2.735	262.865	3.37016		672	3.33	265.162	6.02294
675	0.9007	193.366	3.47982		675	2.82	263.937	3.57797		675	3.859	266.231	5.72422
678	0.9947	194.138	3.54418		678	2.76	265.009	3.77095		678	4.307	267.3	5.52333
681	0.9644	194.91	3.6232		681	2.302	266.081	3.9263		681	4.035	268.369	5.44964
684	0.8	195.682	3.70901		684	1.959	267.153	4.02572		684	3.28	269.438	5.51387
687	0.6589	196.453	3.79305		687	2.13	268.225	4.05769		687	3.033	270.508	5.70658
690	0.7731	197.225	3.86686		690	2.508	269.297	4.01875		690	3.199	271.577	5.99954
693	0.8436	197.997	3.92284		693	2.704	270.369	3.9139		693	3.713	272.646	6.34994
696	0.9376	198.769	3.95497		696	2.538	271.441	3.75603		696	3.919	273.715	6.70665
699	0.7429	199.541	3.95934		699	2.357	272.514	3.56432		699	3.687	274.784	7.0177
702	0.8637	200.312	3.93451		702	1.914	273.586	3.36193		702	3.244	275.853	7.23787
705	0.7093	201.084	3.88158		705	2.206	274.658	3.17325		705	2.917	276.922	7.33532
708	0.8436	201.856	3.80416		708	2.276	275.73	3.02097		708	3.093	277.991	7.29612
711	0.9544	202.628	3.70796		711	2.659	276.802	2.92334		711	3.939	279.06	7.12635
714	0.6824	203.399	3.6003		714	2.75	277.874	2.89205		714	4.261	280.129	6.85112
717	0.8503	204.171	3.48942		717	2.543	278.946	2.93082		717	3.632	281.198	6.51084
720	0.8436	204.943	3.38375		720	2.075	280.018	3.03499		720	3.108	282.267	6.15534
723	0.6959	205.715	3.29112		723	2.03	281.09	3.19208		723	2.811	283.336	5.83657
726	0.6388	206.486	3.2181		726	1.959	282.162	3.3833		726	3.189	284.405	5.60095
729	0.6522	207.258	3.16943		729	2.382	283.234	3.58584		729	3.793	285.474	5.48269
732	0.4978	208.03	3.14759		732	2.473	284.306	3.77557		732	3.864	286.544	5.49874
735	0.622	208.802	3.15266		735	2.367	285.378	3.92996		735	3.526	287.613	5.64642
738	0.575	209.574	3.18233		738	2.241	286.45	4.03075		738	2.851	288.682	5.90378
741	0.424	210.345	3.23219		741	1.939	287.523	4.06612		741	2.806	289.751	6.23292
744	0.518	211.117	3.29614		744	1.783	288.595	4.03209		744	3.3	290.82	6.5855
747	0.4844	211.889	3.36702		747	1.949	289.667	3.93298		747	3.692	291.889	6.90983
750	0.5314	212.661	3.43725		750	2.397	290.739	3.7809		750	3.692	292.958	7.15845
753	0.5482	213.432	3.49958		753	2.412	291.811	3.59421		753	3.305	294.027	7.29504
756	0.4844	214.204	3.54773		756	2.322	292.883	3.39539		756	2.756	295.096	7.29968
759	0.5549	214.976	3.57695		759	1.974	293.955	3.20831		759	2.615	296.165	7.17175
762	0.3703	215.748	3.5844		762	1.596	295.027	3.05534		762	3.199	297.234	6.92996
765	0.528	216.52	3.56943		765	1.858	296.099	2.95475		765	3.728	298.303	6.60961
768	0.4441	217.291	3.53351		768	2.317	297.171	2.91848		768	3.738	299.372	6.25738
771	0.669	218.063	3.48011		771	2.397	298.243	2.95076		771	3.189	300.441	5.92447
774	0.4508	218.835	3.41428		774	2.357	299.315	3.04759		774	2.434	301.511	5.65917
777	0.3803	219.607	3.34216		777	1.989	300.387	3.19727		777	2.655	302.58	5.49976
780	0.3098	220.378	3.27038		780	1.803	301.459	3.38182		780	3.285	303.649	5.46897
783	0.3904	221.15	3.2054		783	1.662	302.532	3.57912		783	3.768	304.718	5.57068
		221.922	3.15296		786	1.989	303.604	3.76556		786	3.738	305.787	5.78943
		222.694	3.1175		789	2.16	304.676	3.9189		789	2.998	306.856	6.09263
		223.465	3.10181		792	2.261	305.748	4.0209		792	2.323	307.925	6.43547
		224.237	3.10682		795	2.085	306.82	4.05951		795	2.746	308.994	6.76738
		225.009	3.13155		798	1.743	307.892	4.03025		798	3.219	310.063	7.0395
		225.781	3.17326		801	1.602	308.964	3.93678		801	3.446	311.132	7.21178
		226.553	3.22775		804	1.667	310.036	3.79042		804	3.108	312.201	7.25881
		227.324	3.28985		807	2.014	311.108	3.60878		807	2.796	313.27	7.17351
		228.096	3.35388		810	2.12	312.18	3.41362		810	2.484	314.339	6.96812
		228.868	3.41425		813	2.166	313.252	3.22829		813	2.741	315.408	6.67237
		229.64	3.46598		816	1.823	314.324	3.07487		816	3.179	316.477	6.32912
		230.411	3.50515		819	1.622	315.396	2.9716		819	3.491	317.547	5.98806
		231.183	3.52925		822	1.597	316.468	2.93064		822	3.224	318.616	5.69843
		231.955	3.53736		825	1.899	317.541	2.9567		825	2.605	319.685	5.50187
		232.727	3.53017		828	2.135	318.613	3.04644		828	2.323	320.754	5.4263
		233.499	3.50986		831	1.994	319.685	3.18892		831	2.771	321.823	5.48192
		234.27	3.47983		834	1.798	320.757	3.36693		834	3.415	322.892	5.65975
		235.042	3.44425		837	1.526	321.829	3.55903		837	3.501	323.961	5.93293
		235.814	3.40768		840	1.551	322.901	3.74216		840	3.159	325.03	6.26077
		236.586	3.3745		843	1.617	323.973	3.89438		843	2.61	326.099	6.59462
		237.357	3.34854		846	2.05	325.045	3.99748		846	2.575	327.168	6.88506
		238.129	3.33259		849	2.201	326.117	4.03918		849	3.013	328.237	7.08911
		238.901	3.32824		852	1.999	327.189	4.01456		852	3.264	329.306	7.17645
		239.673	3.33565		855	1.546	328.261	3.92663		855	3.526	330.375	7.13386
		240.444	3.35362		858	1.541	329.333	3.78596		858	2.937	331.444	6.96711
		241.216	3.37972		861	1.652	330.405	3.60938		861	2.58	332.514	6.70009
		241.988	3.41057		864	1.667	331.477	3.41799		864	2.419	333.583	6.37122
		242.76	3.44224		867	1.949	332.55	3.23458		867	2.947	334.652	6.02792
		243.532	3.47068		870	1.979	333.622	3.08095		870	3.209	335.721	5.71956
		244.303	3.49212		873	1.778	334.694	2.97526		873	3.209	336.79	5.49032
		245.075	3.50354		876	1.481	335.766	2.92991		876	2.635	337.859	5.37272
		245.847	3.50295		879	1.299	336.838	2.95004		879	2.373	338.928	5.38288
		246.619	3.4896		882	1.556	337.91	3.03295		882	2.726	339.997	5.51824
		247.39	3.46408		885	1.823	338.982	3.16844		885	3.224	341.066	5.75794
		248.162	3.42828		888	1.944	340.054	3.34005		888	3.461	342.135	6.06593
		248.934	3.38511		891	1.702	341.126	3.52703		891	3.128	343.204	6.39623
		249.706	3.33826		894	1.35	342.198	3.70685		894	2.64	344.273	6.6997
		250.477	3.2918		897	1.41	343.27	3.85787		897	2.283	345.342	6.93119
		251.249	3.24972		900	1.264	344.342	3.96196		900	2.524	346.411	7.05615
		252.021	3.21549		903	1.642	345.414	4.00664		903	3.229	347.48	7.05566
		252.793	3.19175		906	1.763	346.486	3.98654		906	3.264	348.55	6.9291
		253.565	3.17994		909	1.758	347.559	3.90406		909	2.882	349.619	6.6943
		254.336	3.18018		912	1.561	348.631	3.76903		912	2.378	350.688	6.38482
		255.108	3.19123		915	1.315	349.703	3.59754		915	2.303	351.757	6.04503
		255.88	3.21061		918	1.169	350.775	3.41001		918	2.635	352.826	5.72367
		256.652	3.23484		921	1.446	351.847	3.22871		921	2.902	353.895	5.46662
		257.423	3.25978		924	1.556	352.919	3.07509		924	3.244	354.964	5.31031
		258.195	3.28109		927	1.768	353.991	2.96727		927	2.716	356.033	5.27636
		258.967	3.29465		930	1.717	355.063	2.91782		930	2.393	357.102	5.36846
		259.739	3.29706		933	1.229	356.135	2.93231		933	2.328	358.171	5.57188
		260.511	3.28596		936	1.038	357.207	3.00865		936	2.585	359.24	5.85566
		261.282	3.26034		939	1.123	358.279	3.13736		939	3.063	360.309	6.17716
		262.054	3.22067		942	1.158	359.351	3.30272		942	3.169	361.378	6.48829
		262.826	3.16895		945	1.612	360.423	3.48465		945	2.549	362.447	6.7426
		263.598	3.10849		948	1.526	361.495	3.66116		948	2.132	363.517	6.90197
		264.369	3.04365		951	1.34	362.568	3.81094		951	2.147	364.586	6.94226
		265.141	2.97947		954	1.068	363.64	3.91593		954	2.63	365.655	6.85673
		265.913	2.92112		957	1.048	364.712	3.96346		957	3.023	366.724	6.65703
		266.685	2.87349		960	1.219	365.784	3.94776		960	2.836	367.793	6.37142
		267.456	2.84064		963	1.481	366.856	3.87064		963	2.585	368.862	6.04067
		268.228	2.82541		966	1.461	367.928	3.74121		966	2.091	369.931	5.71204
		269	2.82912		969	1.35	369	3.57485		969	2.373	371	5.43235
		269.772	2.85141		972	1.249	370.072	3.39127		972	2.967	372.069	5.24121
		270.544	2.89023		975	0.957	371.144	3.21223		975	3.103	373.138	5.16517
		271.315	2.94201		978	1.168	372.216	3.05885		978	3.194	374.207	5.21393
		272.087	3.00197		981	1.279	373.288	2.94916		981	2.167	375.276	5.37895
		272.859	3.06453		984	1.576	374.36	2.89589		984	2.126	376.345	5.63469
		273.631	3.12383		987	1.365	375.432	2.90504		987	2.373	377.414	5.94243
		274.402	3.1743		990	1.189	376.505	2.97507		990	2.756	378.483	6.25593
		275.174	3.21115		993	0.957	377.577	3.09721		993	3.028	379.553	6.52817
		275.946	3.23085		996	1.048	378.649	3.25646		996	2.721	380.622	6.71828
		276.718	3.23145		999	1.088	379.721	3.43343		999	2.202	381.691	6.79743
		277.489	3.21283		1002	1.42	380.793	3.60664		1002	2.016	382.76	6.75305
		278.261	3.17669		1005	1.445	381.865	3.75512		1005	2.358	383.829	6.59062
		279.033	3.12639		1008	1.138	382.937	3.86091		1008	2.766	384.898	6.33286
		279.805	3.06674		1011	1.168	384.009	3.91118		1011	2.892	385.967	6.01632
		280.577	3.00345		1014	0.851	385.081	3.89978		1014	2.554	387.036	5.68609
		281.348	2.94271		1017	0.856	386.153	3.82792		1017	2.131	388.105	5.38912
		282.12	2.89055		1020	1.174	387.225	3.70405		1020	1.814	389.174	5.16744
		282.892	2.85231		1023	1.304	388.297	3.54282		1023	2.272	390.243	5.05196
		283.664	2.83213		1026	1.269	389.369	3.36329		1026	2.675	391.312	5.05803
		284.435	2.83254		1029	0.907	390.441	3.18666		1029	2.816	392.381	5.1832
		285.207	2.85424		1032	0.72	391.514	3.03373		1032	2.489	393.45	5.40765
		285.979	2.89599		1035	0.841	392.586	2.92242		1035	1.885	394.52	5.69707
		286.751	2.95474		1038	1.053	393.658	2.86563		1038	2.046	395.589	6.00774
		287.523	3.02583		1041	1.34	394.73	2.8697		1041	2.348	396.658	6.29292
		288.294	3.10347		1044	1.38	395.802	2.93368		1044	2.69	397.727	6.50968
		289.066	3.18122		1047	1.002	396.874	3.04946		1047	2.741	398.796	6.62517
		289.838	3.25256		1050	0.987	397.946	3.20276		1050	2.021	399.865	6.62137
		290.61	3.31149		1053	0.866	399.018	3.37484		1053	1.714	400.934	6.49772
		291.381	3.35304		1056	0.947	400.09	3.54476		1056	2.157	402.003	6.27116
		292.153	3.37374		1059	1.103	401.162	3.6919		1059	2.278	403.072	5.97361
		292.925	3.3719		1062	1.269	402.234	3.7984		1062	2.549	404.141	5.64728
		293.697	3.34777		1065	1.103	403.306	3.85129		1065	2.444	405.21	5.3385
		294.468	3.30347		1068	0.786	404.378	3.84405		1068	2.177	406.279	5.09094
		295.24	3.24285		1071	0.866	405.45	3.77737		1071	1.447	407.348	4.93922
		296.012	3.17105		1074	0.942	406.523	3.65901		1074	1.628	408.417	4.90389
		296.784	3.0941		1077	0.685	407.595	3.50292		1077	2.403	409.486	4.98848
		297.556	3.01834		1080	1.007	408.667	3.3275		1080	2.454	410.556	5.17898
		298.327	2.94983		1083	1.143	409.739	3.15342		1083	2.237	411.625	5.44594
		299.099	2.89387				410.811	3.00115				412.694	5.74881
		299.871	2.85446				411.883	2.88847				413.763	6.04185
		300.643	2.83401				412.955	2.82842				414.832	6.28087
		301.414	2.83316				414.027	2.82768				415.901	6.42965
		302.186	2.85069				415.099	2.88585				416.97	6.46521
		302.958	2.88373				416.171	2.99547				418.039	6.38114
		303.73	2.928				417.243	3.14296				419.108	6.18852
		304.502	2.97826				418.315	3.31023				420.177	5.91425
		305.273	3.02878				419.387	3.47687				421.246	5.59708
		306.045	3.07389				420.459	3.62262				422.315	5.28196
		306.817	3.10847				421.532	3.72973				423.384	5.01342
		307.589	3.12845				422.604	3.78512				424.453	4.82913
		308.36	3.13111				423.676	3.78193				425.523	4.75435
		309.132	3.11537				424.748	3.72032				426.592	4.7983
		309.904	3.08177				425.82	3.60741				427.661	4.95283
		310.676	3.03248				426.892	3.45646				428.73	5.19369
		311.447	2.97101				427.964	3.28522				429.799	5.48404
		312.219	2.90188				429.036	3.11382				430.868	5.77989
		312.991	2.83019				430.108	2.96238				431.937	6.03655
		313.763	2.76116				431.18	2.84857				433.006	6.21512
		314.535	2.69963				432.252	2.7855				434.075	6.28819
		315.306	2.64965				433.324	2.78022				435.144	6.24382
		316.078	2.61413				434.396	2.83281				436.213	6.08722
		316.85	2.59464				435.468	2.93647				437.282	5.83998
		317.622	2.59129				436.541	3.07828				438.351	5.53688
		318.393	2.60276				437.613	3.24082				439.42	5.2208
		319.165	2.62653				438.685	3.4042				440.489	4.93639
		319.937	2.65911				439.757	3.5485				441.559	4.72361
		320.709	2.69643				440.829	3.65612				442.628	4.61187
		321.48	2.73427				441.901	3.71389				443.697	4.61577
		322.252	2.7686				442.973	3.71463				444.766	4.73297
		323.024	2.79604				444.045	3.65798				445.835	4.94461
		323.796	2.8141				445.117	3.55046				446.904	5.21808
		324.568	2.82139				446.189	3.40463				447.973	5.5118
		325.339	2.81773				447.261	3.23761				449.042	5.7813
		326.111	2.80411				448.333	3.06901				450.111	5.98577
		326.883	2.7825				449.405	2.91858				451.18	6.09395
		327.655	2.75568				450.477	2.80384				452.249	6.08871
		328.426	2.72687				451.55	2.738				453.318	5.96953
		329.198	2.6994				452.622	2.72842				454.387	5.75251
		329.97	2.67634				453.694	2.77566				455.456	5.46801
		330.742	2.66026				454.766	2.87354				456.526	5.15618
		331.514	2.65288				455.838	3.00982				457.595	4.86107
		332.285	2.65501				456.91	3.16768				458.664	4.62421
		333.057	2.66642				457.982	3.3278				459.733	4.47853
		333.829	2.68594				459.054	3.4706				460.802	4.44359
		334.601	2.7116				460.126	3.57864				461.871	4.52272
		335.372	2.74084				461.198	3.63867				462.94	4.70261
		336.144	2.77081				462.27	3.6432				464.009	4.95525
		336.916	2.7987				463.342	3.5914				465.078	5.24206
		337.688	2.82199				464.414	3.48918				466.147	5.51956
		338.459	2.83876				465.486	3.34845				467.216	5.74571
		339.231	2.84785				466.559	3.18569				468.285	5.88608
		340.003	2.84898				467.631	3.01998				469.354	5.91879
		340.775	2.84276				468.703	2.87072				470.423	5.83776
		341.547	2.83061				469.775	2.75525				471.492	5.65353
		342.318	2.81455				470.847	2.68688				472.562	5.39167
		343.09	2.79701				471.919	2.67322				473.631	5.08905
		343.862	2.78052				472.991	2.71533				474.7	4.78841
		344.634	2.7674				474.063	2.80762				475.769	4.53211
		345.405	2.75955				475.135	2.93848				476.838	4.35596
		346.177	2.75814				476.207	3.09175				477.907	4.28398
		346.949	2.76353				477.279	3.2486				478.976	4.32495
		347.721	2.77519				478.351	3.38985				480.045	4.47113
		348.492	2.79173				479.423	3.49821				481.114	4.69943
		349.264	2.81102				480.495	3.56036				482.183	4.97483
		350.036	2.83046				481.568	3.56855				483.252	5.25548
		350.808	2.84717				482.64	3.52148				484.321	5.49889
		351.58	2.85839				483.712	3.42448				485.39	5.66806
		352.351	2.8617				484.784	3.2888				486.459	5.73693
		353.123	2.85534				485.856	3.13033				487.529	5.69412
		353.895	2.83841				486.928	2.96761				488.598	5.54461
		354.667	2.811				488	2.81965				489.667	5.30894
		355.438	2.77424				489.072	2.70365				490.736	5.02016
		356.21	2.73019				490.144	2.63295				491.805	4.71907
		356.982	2.68167				491.216	2.61544				492.874	4.44813
		357.754	2.63204				492.288	2.65263				493.943	4.24534
		358.526	2.58486				493.36	2.73949				495.012	4.13867
		359.297	2.54354				494.432	2.86506				496.081	4.142
		360.069	2.51102				495.505	3.01379				497.15	4.25312
		360.841	2.48947				496.577	3.16738				498.219	4.45408
		361.613	2.48002				497.649	3.30702				499.288	4.71387
		362.384	2.4827				498.721	3.4156				500.357	4.99293
		363.156	2.49634				499.793	3.47974				501.426	5.24899
		363.928	2.51869				500.865	3.49145				502.495	5.44323
		364.7	2.54663				501.937	3.44898				503.565	5.54591
		365.471	2.57642				503.009	3.3571				504.634	5.54076
		366.243	2.60406				504.081	3.22645				505.703	5.42726
		367.015	2.62568				505.153	3.07227				506.772	5.22074
		367.787	2.6379				506.225	2.9126				507.841	4.95007
		368.559	2.63821				507.297	2.76608				508.91	4.65343
		369.33	2.62516				508.369	2.64972				509.979	4.37272
		370.102	2.59859				509.441	2.57689				511.048	4.14744
		370.874	2.55965				510.514	2.55574				512.117	4.0089
		371.646	2.51071				511.586	2.5882				513.186	3.9757
		372.417	2.45519				512.658	2.6698				514.255	4.05101
		373.189	2.39726				513.73	2.7902				515.324	4.22217
		373.961	2.34148				514.802	2.93445				516.393	4.46253
		374.733	2.29235				515.874	3.08479				517.462	4.73542
		375.505	2.25396				516.946	3.22276				518.532	4.99947
		376.276	2.22956				518.018	3.33144				519.601	5.21471
		377.048	2.22126				519.09	3.39745				520.67	5.34838
		377.82	2.22987				520.162	3.41253				521.739	5.37969
		378.592	2.25474				521.234	3.37454				522.808	5.30285
		379.363	2.29387				522.306	3.28768				523.877	5.12789
		380.135	2.34403				523.378	3.16199				524.946	4.87911
		380.907	2.40103				524.45	3.01211				526.015	4.5916
		381.679	2.46016				525.523	2.85556				527.084	4.30599
		382.45	2.51651				526.595	2.71059				528.153	4.06257
		383.222	2.56547				527.667	2.59402				529.222	3.8954
		383.994	2.6031				528.739	2.51927				530.291	3.82732
		384.766	2.62651				529.811	2.49468				531.36	3.86669
		385.538	2.63407				530.883	2.5226				532.429	4.00613
		386.309	2.62559				531.955	2.5991				533.499	4.22369
		387.081	2.60232				533.027	2.71443				534.568	4.48605
		387.853	2.56679				534.099	2.85426				535.637	4.75344
		388.625	2.52262				535.171	3.00133				536.706	4.98541
		389.396	2.47418				536.243	3.13758				537.775	5.14681
		390.168	2.42616				537.315	3.24626				538.844	5.21282
		390.94	2.38316				538.387	3.314				539.913	5.17266
		391.712	2.34931				539.459	3.33231				540.982	5.03103
		392.483	2.32783				540.532	3.29866				542.051	4.80746
		393.255	2.32081				541.604	3.21672				543.12	4.53343
		394.027	2.32899				542.676	3.09593				544.189	4.24768
		394.799	2.35174				543.748	2.95035				545.258	3.99064
		395.571	2.38708				544.82	2.79696				546.327	3.79844
		396.342	2.4319				545.892	2.65364				547.396	3.69766
		397.114	2.48225				546.964	2.53703				548.465	3.70152
		397.886	2.53367				548.036	2.46052				549.535	3.8079
		398.658	2.58162				549.108	2.43268				550.604	3.99974
		399.429	2.62188				550.18	2.45625				551.673	4.24754
		400.201	2.65089				551.252	2.52779				552.742	4.51369
		400.973	2.66608				552.324	2.63818				553.811	4.75798
		401.745	2.66607				553.396	2.77364				554.88	4.94347
		402.517	2.65074				554.468	2.91744				555.949	5.04192
		403.288	2.62128				555.541	3.0519				557.018	5.03782
		404.06	2.57997				556.613	3.16049				558.087	4.9307
		404.832	2.53003				557.685	3.22982				559.156	4.73512
		405.604	2.47525				558.757	3.25121				560.225	4.47854
		406.375	2.41967				559.829	3.22176				561.294	4.19729
		407.147	2.36723				560.901	3.14463				562.363	3.9312
		407.919	2.32137				561.973	3.02867				563.432	3.71784
		408.691	2.28482				563.045	2.88737				564.501	3.58699
		409.462	2.2593				564.117	2.73719				565.571	3.55634
		410.234	2.24545				565.189	2.59563				566.64	3.6289
		411.006	2.24284				566.261	2.47911				567.709	3.79262
		411.778	2.24998				567.333	2.40101				568.778	4.02217
		412.55	2.26457				568.405	2.3701				569.847	4.28267
		413.321	2.28372				569.477	2.38948				570.916	4.53477
		414.093	2.30424				570.55	2.45623				571.985	4.74046
		414.865	2.32297				571.622	2.56177				573.054	4.86859
		415.637	2.33707				572.694	2.69291				574.123	4.89937
		416.408	2.34426				573.766	2.83344				575.192	4.82732
		417.18	2.34307				574.838	2.96606				576.261	4.66195
		417.952	2.33289				575.91	3.07444				577.33	4.4264
		418.724	2.31401				576.982	3.14523				578.399	4.15401
		419.495	2.28759				578.054	3.16957				579.468	3.88345
		420.267	2.25548				579.126	3.14417				580.538	3.65303
		421.039	2.22003				580.198	3.07173				581.607	3.49513
		421.811	2.18382				581.27	2.96053				582.676	3.43149
		422.583	2.14946				582.342	2.82348				583.745	3.47004
		423.354	2.11925				583.414	2.67654				584.814	3.60377
		424.126	2.09506				584.486	2.53682				585.883	3.8118
		424.898	2.07809				585.559	2.42052				586.952	4.06245
		425.67	2.06885				586.631	2.341				588.021	4.31789
		426.441	2.06711				587.703	2.3072				589.09	4.53966
		427.213	2.07195				588.775	2.32256				590.159	4.6943
		427.985	2.08194				589.847	2.38465				591.228	4.75825
		428.757	2.09528				590.919	2.48544				592.297	4.72121
		429.529	2.11001				591.991	2.61232				593.366	4.58769
		430.3	2.12425				593.063	2.74958				594.435	4.37626
		431.072	2.13636				594.135	2.88029				595.505	4.11683
		431.844	2.14517				595.207	2.98838				596.574	3.84628
		432.616	2.15003				596.279	3.06049				597.643	3.60304
		433.387	2.15089				597.351	3.08761				598.712	3.42146
		434.159	2.14827				598.423	3.06614				599.781	3.32684
		434.931	2.14318				599.495	2.99827				600.85	3.33174
		435.703	2.137				600.568	2.89175				601.919	3.43415
		436.474	2.13126				601.64	2.75892				602.988	3.61785
		437.246	2.1275				602.712	2.61525				604.057	3.85476
		438.018	2.12702				603.784	2.47744				605.126	4.10913
		438.79	2.13077				604.856	2.36148				606.195	4.34271
		439.562	2.13919				605.928	2.28069				607.264	4.52038
		440.333	2.15215				607	2.24417				608.333	4.61527
		441.105	2.16894				608.072	2.25567				609.402	4.61264
		441.877	2.18834				609.144	2.31324				610.471	4.51203
		442.649	2.20875				610.216	2.40939				611.541	4.3273
		443.42	2.22831				611.288	2.53206				612.61	4.08457
		444.192	2.24516				612.36	2.66603				613.679	3.81837
		444.964	2.2576				613.432	2.79479				614.748	3.5666
		445.736	2.26428				614.505	2.90247				615.817	3.36499
		446.508	2.2644				615.577	2.97578				616.886	3.24184
		447.279	2.25777				616.649	3.00555				617.955	3.214
		448.051	2.24485				617.721	2.98785				619.024	3.28431
		448.823	2.22678				618.793	2.92443				620.093	3.44133
		449.595	2.2052				619.865	2.82251				621.162	3.66096
		450.366	2.18218				620.937	2.69387				622.231	3.91001
		451.138	2.15994				622.009	2.55347				623.3	4.15108
		451.91	2.14069				623.081	2.41765				624.369	4.34802
		452.682	2.12633				624.153	2.30215				625.438	4.47118
		453.453	2.11831				625.225	2.22024				626.508	4.50178
		454.225	2.11742				626.297	2.18114				627.577	4.43457
		454.997	2.12369				627.369	2.18895				628.646	4.27861
		455.769	2.13638				628.441	2.24213				629.715	4.05592
		456.541	2.15397				629.514	2.33374				630.784	3.79819
		457.312	2.17436				630.586	2.45224				631.853	3.5422
		458.084	2.19498				631.658	2.58294				632.922	3.32439
		458.856	2.21306				632.73	2.70969				633.991	3.17555
		459.628	2.2259				633.802	2.81687				635.06	3.11636
		460.399	2.23111				634.874	2.89124				636.129	3.15435
		461.171	2.22689				635.946	2.92351				637.198	3.28287
		461.943	2.21216				637.018	2.90945				638.267	3.48205
		462.715	2.18678				638.09	2.85036				639.336	3.72176
		463.486	2.15151				639.162	2.75294				640.405	3.96602
		464.258	2.10803				640.234	2.62845				641.474	4.17826
		465.03	2.05876				641.306	2.49134				642.544	4.32666
		465.802	2.00674				642.378	2.35757				643.613	4.38879
		466.574	1.9553				643.45	2.24263				644.682	4.3549
		467.345	1.90779				644.523	2.15973				645.751	4.22923
		468.117	1.86732				645.595	2.11822				646.82	4.02947
		468.889	1.8364				646.667	2.12248				647.889	3.78406
		469.661	1.81681				647.739	2.17141				648.958	3.52808
		470.432	1.80933				648.811	2.25857				650.027	3.29806
		471.204	1.81373				649.883	2.37296				651.096	3.12669
		471.976	1.82877				650.955	2.50038				652.165	3.03803
		472.748	1.85227				652.027	2.62507				653.234	3.04401
		473.52	1.88134				653.099	2.73166				654.303	3.14272
		474.291	1.91263				654.171	2.80697				655.372	3.31873
		475.063	1.94258				655.243	2.84159				656.441	3.54535
		475.835	1.96781				656.315	2.83102				657.511	3.78857
		476.607	1.98538				657.387	2.77614				658.58	4.01202
		477.378	1.99307				658.459	2.68314				659.649	4.18229
		478.15	1.9896				659.532	2.56274				660.718	4.27382
		478.922	1.97471				660.604	2.42894				661.787	4.2726
		479.694	1.94922				661.676	2.29727				662.856	4.17821
		480.465	1.91496				662.748	2.18299				663.925	4.0038
		481.237	1.87458				663.82	2.09923				664.994	3.77424
		482.009	1.83137				664.892	2.05546				666.063	3.52235
		482.781	1.78889				665.964	2.05632				667.132	3.28418
		483.553	1.75075				667.036	2.10112				668.201	3.0937
		484.324	1.7202				668.108	2.18393				669.27	2.97786
		485.096	1.6999				669.18	2.29427				670.339	2.95264
		485.868	1.69166				670.252	2.41841				671.408	3.02078
		486.64	1.6963				671.324	2.54099				672.477	3.17136
		487.411	1.71357				672.396	2.6469				673.547	3.38149
		488.183	1.74215				673.468	2.72302				674.616	3.61959
		488.955	1.77983				674.541	2.75986				675.685	3.85011
		489.727	1.82366				675.613	2.75264				676.754	4.03863
		490.498	1.8702				676.685	2.70184				677.823	4.15699
		491.27	1.91588				677.757	2.61316				678.892	4.18731
		492.042	1.95725				678.829	2.49683				679.961	4.12461
		492.814	1.99129				679.901	2.36632				681.03	3.9775
		493.586	2.01566				680.973	2.2368				682.099	3.76691
		494.357	2.02891				682.045	2.12327				683.168	3.523
		495.129	2.03054				683.117	2.03879				684.237	3.28075
		495.901	2.02106				684.189	1.99289				685.306	3.07479
		496.673	2.00188				685.261	1.99049				686.375	2.93443
		497.444	1.9752				686.333	2.0313				687.444	2.87932
		498.216	1.94374				687.405	2.10986				688.514	2.91664
		498.988	1.91055				688.477	2.21619				689.583	3.04003
		499.76	1.87867				689.55	2.33706				690.652	3.23063
		500.532	1.85089				690.622	2.45749				691.721	3.45976
		501.303	1.8295				691.694	2.56262				692.79	3.69321
		502.075	1.8161				692.766	2.63944				693.859	3.8962
		502.847	1.81146				693.838	2.67836				694.928	4.03847
		503.619	1.81551				694.91	2.67435				695.997	4.09869
		504.39	1.82735				695.982	2.6275				697.066	4.06757
		505.162	1.84535				697.054	2.54306				698.135	3.94917
		505.934	1.86734				698.126	2.43072				699.204	3.7603
		506.706	1.89082				699.198	2.30351				700.273	3.52801
		507.477	1.91319				700.27	2.17619				701.342	3.28566
		508.249	1.93199				701.342	2.0635				702.411	3.06799
		509.021	1.94511				702.414	1.9784				703.48	2.9061
		509.793	1.951				703.486	1.93052				704.55	2.82285
		510.565	1.94875				704.559	1.92501				705.619	2.82961
		511.336	1.93816				705.631	1.96195				706.688	2.92455
		512.108	1.91973				706.703	2.03634				707.757	3.09301
		512.88	1.8946				707.775	2.13873				708.826	3.30958
		513.652	1.86439				708.847	2.25633				709.895	3.54193
		514.423	1.83104				709.919	2.37457				710.964	3.75547
		515.195	1.79663				710.991	2.47885				712.033	3.91842
		515.967	1.76317				712.063	2.55624				713.102	4.00648
		516.739	1.7324				713.135	2.59711				714.171	4.00633
		517.511	1.70571				714.207	2.59616				715.24	3.91755
		518.282	1.68397				715.279	2.55316				716.309	3.75267
		519.054	1.66752				716.351	2.47285				717.378	3.53533
		519.826	1.65615				717.423	2.36446				718.447	3.29674
		520.598	1.6492				718.495	2.24053				719.517	3.07121
		521.369	1.64564				719.568	2.11544				720.586	2.89102
		522.141	1.64421				720.64	2.00368				721.655	2.7818
		522.913	1.64358				721.712	1.91808				722.724	2.75876
		523.685	1.6425				722.784	1.86835				723.793	2.8245
		524.456	1.63994				723.856	1.85986				724.862	2.96865
		525.228	1.63517				724.928	1.89305				725.931	3.1694
		526	1.62787				726	1.96338				727	3.39676
		526.772	1.61813				727.072	2.06188				728.069	3.61689
		527.544	1.60639				728.144	2.17622				729.138	3.79707
		528.315	1.59342				729.216	2.29223				730.207	3.91052
		529.087	1.58021				730.288	2.39557				731.276	3.94022
		529.859	1.5678				731.36	2.47344				732.345	3.88145
		530.631	1.5572				732.432	2.51611				733.414	3.7424
		531.402	1.54924				733.505	2.5181				734.483	3.54297
		532.174	1.54449				734.577	2.4788				735.553	3.31184
		532.946	1.54316				735.649	2.40254				736.622	3.08227
		533.718	1.5451				736.721	2.29803				737.691	2.88723
		534.489	1.54979				737.793	2.17738				738.76	2.75456
		535.261	1.55644				738.865	2.05456				739.829	2.70295
		536.033	1.56402				739.937	1.9438				740.898	2.73924
		536.805	1.57144				741.009	1.85781				741.967	2.85738
		537.577	1.57765				742.081	1.80636				743.036	3.03942
		538.348	1.58175				743.153	1.79502				744.105	3.25811
		539.12	1.58315				744.225	1.82459				745.174	3.48089
		539.892	1.58161				745.297	1.89095				746.243	3.67469
		540.664	1.57728				746.369	1.98561				747.312	3.81073
		541.435	1.57075				747.441	2.09671				748.381	3.86873
		542.207	1.56294				748.514	2.21046				749.45	3.83985
		542.979	1.55503				749.586	2.31279				750.52	3.72796
		543.751	1.54835				750.658	2.39101				751.589	3.54903
		544.523	1.54423				751.73	2.43537				752.658	3.32881
		545.294	1.54383				752.802	2.44016				753.727	3.099
		546.066	1.54802				753.874	2.40445				754.796	2.89267
		546.838	1.55726				754.946	2.33213				755.865	2.73937
		547.61	1.57151				756.018	2.23145				756.934	2.66086
		548.381	1.5902				757.09	2.11406				758.003	2.66794
		549.153	1.61226				758.162	1.99354				759.072	2.75888
		549.925	1.6362				759.234	1.88384				760.141	2.91971
		550.697	1.66021				760.306	1.79758				761.21	3.12631
		551.468	1.68231				761.378	1.74453				762.279	3.34789
		552.24	1.70058				762.45	1.73048				763.348	3.55157
		553.012	1.71327				763.523	1.75654				764.417	3.70714
		553.784	1.71904				764.595	1.81902				765.486	3.79147
		554.556	1.71703				765.667	1.90991				766.556	3.79189
		555.327	1.70704				766.739	2.01778				767.625	3.70801
		556.099	1.6895				767.811	2.12924				768.694	3.55176
		556.871	1.66548				768.883	2.23048				769.763	3.3456
		557.643	1.63661				769.955	2.30896				770.832	3.11923
		558.414	1.60495				771.027	2.35487				771.901	2.90526
		559.186	1.57283				772.099	2.36234				772.97	2.73441
		559.958	1.54258				773.171	2.33009				774.039	2.63105
		560.73	1.51641				774.243	2.26162				775.108	2.60964
		561.501	1.49613				775.315	2.16471				776.177	2.67265
		562.273	1.48302				776.387	2.05055				777.246	2.81021
		563.045	1.4777				777.459	1.93236				778.315	3.00161
		563.817	1.48004				778.532	1.8238				779.384	3.2183
		564.589	1.48919				779.604	1.73736				780.453	3.4281
		565.36	1.50361				780.676	1.68283				781.523	3.5999
		566.132	1.52123				781.748	1.66619				782.592	3.70822
		566.904	1.53963				782.82	1.68886				783.661	3.73689
		567.676	1.55623				783.892	1.74757				784.73	3.6814
		568.447	1.56853				784.964	1.83474				785.799	3.54955
		569.219	1.57435				786.036	1.93941				786.868	3.36027
		569.991	1.57204				787.108	2.04855				787.937	3.14084
		570.763	1.5606				788.18	2.14864				789.006	2.92289
		571.535	1.53983				789.252	2.22726				790.075	2.73776
		572.306	1.51031				790.324	2.27461				791.144	2.61194
		573.078	1.47342				791.396	2.28462				792.213	2.56321
		573.85	1.43116				792.468	2.25572				793.282	2.59806
		574.622	1.38606				793.541	2.191				794.351	2.71075
		575.393	1.3409				794.613	2.09779				795.42	2.88421
		576.165	1.29854				795.685	1.98685				796.489	3.09249
		576.937	1.26161				796.757	1.87101				797.559	3.30467
		577.709	1.23233				797.829	1.76365				798.628	3.48927
		578.48	1.21233				798.901	1.67712				799.697	3.61892
		579.252	1.20245				799.973	1.62124				800.766	3.67435
		580.024	1.20277				801.045	1.60214				801.835	3.64715
		580.796	1.21253				802.117	1.62154				802.904	3.54099
		581.568	1.23023				803.189	1.67656				803.973	3.37106
		582.339	1.25378				804.261	1.76008				805.042	3.16185
		583.111	1.28066				805.333	1.86155				806.111	2.94352
		583.883	1.30817				806.405	1.96835				807.18	2.74751
		584.655	1.33366				807.477	2.06723				808.249	2.60193
		585.426	1.35474				808.55	2.14591				809.318	2.52747
		586.198	1.36948				809.622	2.19457				810.387	2.53439
		586.97	1.3766				810.694	2.207				811.456	2.62106
		587.742	1.37556				811.766	2.18133				812.526	2.7742
		588.514	1.36656				812.838	2.12026				813.595	2.97085
		589.285	1.35054				813.91	2.03069				814.664	3.18174
		590.057	1.32907				814.982	1.92295				815.733	3.37559
		590.829	1.30422				816.054	1.80947				816.802	3.52368
		591.601	1.27832				817.126	1.70337				817.871	3.604
		592.372	1.25379				818.198	1.61685				818.94	3.60452
		593.144	1.2329				819.27	1.55972				820.009	3.52486
		593.916	1.21759				820.342	1.53828				821.078	3.37636
		594.688	1.20931				821.414	1.55453				822.147	3.18038
		595.459	1.20885				822.486	1.60596				823.216	2.96518
		596.231	1.21637				823.559	1.68588				824.285	2.76176
		597.003	1.23133				824.631	1.7842				825.354	2.59935
		597.775	1.25258				825.703	1.88864				826.423	2.50111
		598.547	1.27846				826.775	1.98624				827.492	2.4808
		599.318	1.30698				827.847	2.06488				828.562	2.54078
		600.09	1.33598				828.919	2.11474				829.631	2.67165
		600.862	1.36332				829.991	2.12946				830.7	2.85371
		601.634	1.38707				831.063	2.10691				831.769	3.0598
		602.405	1.40565				832.135	2.04939				832.838	3.25934
		603.177	1.41796				833.207	1.9634				833.907	3.42273
		603.949	1.42344				834.279	1.85882				834.976	3.52574
		604.721	1.42212				835.351	1.74773				836.045	3.55299
		605.492	1.41453				836.423	1.64295				837.114	3.50019
		606.264	1.40166				837.495	1.55652				838.183	3.37477
		607.036	1.38487				838.568	1.49826				839.252	3.19471
		607.808	1.36568				839.64	1.47459				840.321	2.98598
		608.58	1.34567				840.712	1.4878				841.39	2.77865
		609.351	1.32634				841.784	1.53574				842.459	2.60252
		610.123	1.30892				842.856	1.61213				843.529	2.4828
		610.895	1.29434				843.928	1.7073				844.598	2.43638
		611.667	1.28314				845	1.80937				845.667	2.46944
		612.438	1.27543				846.072	1.90564				846.736	2.57653
		613.21	1.27092				847.144	1.98415				847.805	2.74139
		613.982	1.26901				848.216	2.03511				848.874	2.93938
		614.754	1.26883				849.288	2.052				849.943	3.14105
		615.526	1.26937				850.36	2.03245				851.012	3.31649
		616.297	1.2696				851.432	1.97839				852.081	3.43967
		617.069	1.26856				852.505	1.89591				853.15	3.49225
		617.841	1.26548				853.577	1.79446				854.219	3.46623
		618.613	1.25983				854.649	1.68576				855.288	3.36511
		619.384	1.25137				855.721	1.58235				856.357	3.20334
		620.156	1.24017				856.793	1.4961				857.426	3.00421
		620.928	1.22654				857.865	1.43682				858.495	2.7964
		621.7	1.21105				858.937	1.41105				859.565	2.6098
		622.471	1.19438				860.009	1.42132				860.634	2.47117
		623.243	1.17727				861.081	1.46586				861.703	2.40016
		624.015	1.16044				862.153	1.53879				862.772	2.40655
		624.787	1.14449				863.225	1.63085				863.841	2.48878
		625.559	1.12985				864.297	1.73052				864.91	2.63421
		626.33	1.11674				865.369	1.82541				865.979	2.82101
		627.102	1.10513				866.441	1.90372				867.048	3.02135
		627.874	1.09481				867.514	1.95565				868.117	3.20548
		628.646	1.0854				868.586	1.97461				869.186	3.34607
		629.417	1.07642				869.658	1.95793				870.255	3.42221
		630.189	1.06735				870.73	1.90724				871.324	3.42245
		630.961	1.05776				871.802	1.8282				872.393	3.34643
		631.733	1.04731				872.874	1.72987				873.462	3.20493
		632.505	1.0359				873.946	1.62357				874.532	3.01827
		633.276	1.02363				875.018	1.52157				875.601	2.81333
		634.048	1.01083				876.09	1.43558				876.67	2.61959
		634.82	0.99806				877.162	1.37537				877.739	2.46484
		635.592	0.98606				878.234	1.34761				878.808	2.37112
		636.363	0.97564				879.306	1.35507				879.877	2.35151
		637.135	0.96764				880.378	1.3963				880.946	2.40824
		637.907	0.96279				881.45	1.46583				882.015	2.5324
		638.679	0.96166				882.523	1.55481				883.084	2.70522
		639.45	0.96456				883.595	1.65208				884.153	2.90091
		640.222	0.97146				884.667	1.74554				885.222	3.09034
		640.994	0.98202				885.739	1.82356				886.291	3.2454
		641.766	0.99555				886.811	1.87638				887.36	3.34302
		642.538	1.01107				887.883	1.89728				888.429	3.36858
		643.309	1.02738				888.955	1.88337				889.499	3.31802
		644.081	1.04319				890.027	1.83594				890.568	3.19837
		644.853	1.05718				891.099	1.76028				891.637	3.02677
		645.625	1.06818				892.171	1.66502				892.706	2.82789
		646.396	1.07525				893.243	1.56113				893.775	2.63033
		647.168	1.0778				894.315	1.46059				894.844	2.46245
		647.94	1.07563				895.387	1.37494				895.913	2.3482
		648.712	1.06901				896.459	1.31391				896.982	2.30368
		649.483	1.05863				897.532	1.28427				898.051	2.33473
		650.255	1.04557				898.604	1.28902				899.12	2.43618
		651.027	1.03118				899.676	1.32704				900.189	2.59257
		651.799	1.01702				900.748	1.39323				901.258	2.78045
		652.571	1.00466				901.82	1.47916				902.327	2.97184
		653.342	0.99558				902.892	1.57403				903.396	3.13827
		654.114	0.99096				903.964	1.66602				904.465	3.25499
		654.886	0.99165				905.036	1.74366				905.535	3.30456
		655.658	0.99799				906.108	1.79726				906.604	3.27938
		656.429	1.00979				907.18	1.81999				907.673	3.18277
		657.201	1.02637				908.252	1.80875				908.742	3.02848
		657.973	1.04652				909.324	1.7645				909.811	2.83865
		658.745	1.06866				910.396	1.69213				910.88	2.64057
		659.517	1.09093				911.468	1.59991				911.949	2.46266
		660.288	1.11134				912.541	1.49844				913.018	2.33035
		661.06	1.12799				913.613	1.3994				914.087	2.26236
		661.832	1.13917				914.685	1.31416				915.156	2.26798
		662.604	1.14355				915.757	1.2524				916.225	2.34571
		663.375	1.14031				916.829	1.22099				917.294	2.48355
		664.147	1.12921				917.901	1.22314				918.363	2.66073
		664.919	1.11058				918.973	1.25803				919.432	2.85078
		665.691	1.08538				920.045	1.32097				920.501	3.02541
		666.462	1.05505				921.117	1.40388				921.571	3.15863
		667.234	1.02145				922.189	1.49634				922.64	3.23055
		668.006	0.98666				923.261	1.58681				923.709	3.23028
		668.778	0.95284				924.333	1.66402				924.778	3.15747
		669.55	0.92203				925.405	1.7183				925.847	3.02239
		670.321	0.89599				926.477	1.74276				926.916	2.84437
		671.093	0.87602				927.55	1.73407				927.985	2.64895
		671.865	0.86291				928.622	1.69289				929.054	2.46418
		672.637	0.85682				929.694	1.62377				930.123	2.31649
		673.408	0.8573				930.766	1.53455				931.192	2.22684
		674.18	0.86333				931.838	1.43549				932.261	2.20767
		674.952	0.87342				932.91	1.33799				933.33	2.26111
		675.724	0.88571				933.982	1.25322				934.399	2.37866
		676.495	0.89819				935.054	1.19084				935.468	2.54249
		677.267	0.90885				936.126	1.15776				936.538	2.72806
		678.039	0.91585				937.198	1.15741				937.607	2.90769
		678.811	0.91768				938.27	1.18928				938.676	3.05461
		679.583	0.91333				939.342	1.24902				939.745	3.14691
		680.354	0.90231				940.414	1.32895				940.814	3.17067
		681.126	0.88475				941.486	1.419				941.883	3.12202
		681.898	0.86136				942.559	1.50792				942.952	3.00768
		682.67	0.83336				943.631	1.58462				944.021	2.84393
		683.441	0.80239				944.703	1.63949				945.09	2.65422
		684.213	0.77036				945.775	1.66556				946.159	2.46578
		684.985	0.73926				946.847	1.65933				947.228	2.30556
		685.757	0.71105				947.919	1.62114				948.297	2.19635
		686.529	0.68744				948.991	1.55517				949.366	2.15344
		687.3	0.66979				950.063	1.46892				950.435	2.18241
		688.072	0.65898				951.135	1.37228				951.505	2.27832
		688.844	0.65536				952.207	1.27634				952.574	2.42649
		689.616	0.65873				953.279	1.19213				953.643	2.6046
		690.387	0.66838				954.351	1.1292				954.712	2.78604
		691.159	0.68316				955.423	1.09456				955.781	2.94374
		691.931	0.70157				956.495	1.09181				956.85	3.05417
		692.703	0.72193				957.568	1.12075				957.919	3.10073
		693.474	0.74251				958.64	1.17736				958.988	3.0762
		694.246	0.76167				959.712	1.25435				960.057	2.98373
		695.018	0.778				960.784	1.34199				961.126	2.83641
		695.79	0.79044				961.856	1.42933				962.195	2.65528
		696.562	0.79833				962.928	1.50545				963.264	2.46631
		697.333	0.80144				964	1.56082				964.333	2.29652
		698.105	0.8				965.072	1.58841				965.402	2.1701
		698.877	0.79463				966.144	1.58452				966.471	2.10485
		699.649	0.78625				967.216	1.54923				967.541	2.1096
		700.42	0.77602				968.288	1.48636				968.61	2.18293
		701.192	0.76517				969.36	1.40303				969.679	2.31343
		701.964	0.75494				970.432	1.30879				970.748	2.48134
		702.736	0.74642				971.505	1.21447				971.817	2.66148
		703.508	0.74047				972.577	1.13086				972.886	2.82696
		704.279	0.73767				973.649	1.06747				973.955	2.95305
		705.051	0.73828				974.721	1.03137				975.024	3.02085
		705.823	0.7422				975.793	1.02634				976.093	3.01998
		706.595	0.74904				976.865	1.05242				977.162	2.95013
		707.366	0.75816				977.937	1.10598				978.231	2.82106
		708.138	0.76871				979.009	1.18006				979.3	2.65114
		708.91	0.77978				980.081	1.26531				980.369	2.46468
		709.682	0.79044				981.153	1.35103				981.438	2.28835
		710.453	0.79981				982.225	1.42651				982.508	2.14729
		711.225	0.80721				983.297	1.4823				983.577	2.06142
		711.997	0.8121				984.369	1.51131				984.646	2.04259
		712.769	0.81421				985.441	1.50966				985.715	2.0928
		713.541	0.81348				986.514	1.47717				986.784	2.20398
		714.312	0.81004				987.586	1.41732				987.853	2.35919
		715.084	0.80423				988.658	1.33688				988.922	2.53507
		715.856	0.79647				989.73	1.24504				989.991	2.70528
		716.628	0.78724				990.802	1.15235				991.06	2.8444
		717.399	0.77703				991.874	1.06941				992.129	2.93156
		718.171	0.76624				992.946	1.00565				993.198	2.95354
		718.943	0.75521				994.018	0.96819				994.267	2.90667
		719.715	0.74413				995.09	0.96096				995.336	2.79731
		720.486	0.73304				996.162	0.98429				996.405	2.64095
		721.258	0.72191				997.234	1.03486				997.474	2.45993
		722.03	0.71057				998.306	1.10608				998.544	2.2801
		722.802	0.69883				999.378	1.18893				999.613	2.12711
		723.574	0.68649				1000.45	1.27301				1000.68	2.02263
		724.345	0.67341				1001.52	1.3478				1001.75	1.98122
		725.117	0.65951				1002.59	1.40392				1002.82	2.00816
		725.889	0.64485				1003.67	1.43424				1003.89	2.09877
		726.661	0.62961				1004.74	1.43474				1004.96	2.23907
		727.432	0.6141				1005.81	1.40496				1006.03	2.40785
		728.204	0.59875				1006.88	1.34807				1007.1	2.5798
		728.976	0.58402				1007.95	1.27047				1008.17	2.72917
		729.748	0.57044				1009.03	1.18103				1009.23	2.83358
		730.52	0.55845				1010.1	1.08999				1010.3	2.87725
		731.291	0.54844				1011.17	1.00777				1011.37	2.8533
		732.063	0.54062				1012.24	0.94373				1012.44	2.76475
		732.835	0.53504				1013.32	0.90499				1013.51	2.62403
		733.607	0.53153				1014.39	0.89567				1014.58	2.45116
		734.378	0.52972				1015.46	0.91634				1015.65	2.27083
		735.15	0.52908				1016.53	0.96398				1016.72	2.10874
		735.922	0.52892				1017.6	1.03239				1017.79	1.98791
		736.694	0.5285				1018.68	1.11285				1018.86	1.92525
		737.465	0.52706				1019.75	1.19526				1019.92	1.92917
		738.237	0.52396				1020.82	1.2693				1020.99	1.99831
		739.009	0.51866				1021.89	1.32568				1022.06	2.12182
		739.781	0.5109				1022.96	1.35722				1023.13	2.28091
		740.553	0.50065				1024.04	1.35977				1024.2	2.45164
		741.324	0.48819				1025.11	1.33261				1025.27	2.60841
		742.096	0.47405				1026.18	1.2786				1026.34	2.72773
		742.868	0.45906				1027.25	1.20381				1027.41	2.79161
		743.64	0.4442				1028.32	1.11674				1028.48	2.79018
		744.411	0.43057				1029.4	1.02738				1029.55	2.72315
		745.183	0.4193				1030.47	0.94595				1030.62	2.5998
		745.955	0.41141				1031.54	0.88169				1031.68	2.43761
		746.727	0.40773				1032.61	0.84177				1032.75	2.25968
		747.499	0.40882				1033.68	0.83045				1033.82	2.0914
		748.27	0.41488				1034.76	0.84854				1034.89	1.95665
		749.042	0.42577				1035.83	0.89334				1035.96	1.8744
		749.814	0.44091				1036.9	0.95897				1037.03	1.85591
		750.586	0.4594				1037.97	1.03706				1038.1	1.90307
		751.357	0.48004				1039.05	1.11778				1039.17	2.00824
		752.129	0.50144				1040.12	1.19102				1040.24	2.15526
		752.901	0.52208				1041.19	1.24757				1041.31	2.32195
		753.673	0.54051				1042.26	1.28025				1042.38	2.48325
		754.444	0.55542				1043.33	1.28475				1043.44	2.61498
		755.216	0.56577				1044.41	1.26012				1044.51	2.69729
		755.988	0.57087				1045.48	1.20893				1045.58	2.71762
		756.76	0.57045				1046.55	1.13689				1046.65	2.67246
		757.532	0.56469				1047.62	1.05219				1047.72	2.56788
		758.303	0.55421				1048.69	0.96453				1048.79	2.41861
		759.075	0.54				1049.77	0.88393				1049.86	2.24587
		759.847	0.52336				1050.84	0.81953				1050.93	2.07428
		760.619	0.50579				1051.91	0.77853				1052	1.92822
		761.39	0.48882				1052.98	0.7653				1053.07	1.82829
		762.162	0.47393				1054.05	0.7809				1054.14	1.78834
		762.934	0.4624				1055.13	0.82293				1055.2	1.81341
		763.706	0.45516				1056.2	0.88582				1056.27	1.89903
		764.477	0.45278				1057.27	0.96155				1057.34	2.0319
		765.249	0.45535				1058.34	1.04057				1058.41	2.19187
		766.021	0.46249				1059.41	1.11295				1059.48	2.35484
		766.793	0.4734				1060.49	1.16961				1060.55	2.49635
		767.565	0.48689				1061.56	1.20333				1061.62	2.59509
		768.336	0.5015				1062.63	1.20968				1062.69	2.63607
		769.108	0.51563				1063.7	1.18751				1063.76	2.61275
		769.88	0.52767				1064.77	1.13906				1064.83	2.52799
		770.652	0.53611				1065.85	1.06973				1065.89	2.39361
		771.423	0.53971				1066.92	0.98738				1066.96	2.22867
		772.195	0.5376				1067.99	0.90144				1068.03	2.05663
		772.967	0.52931				1069.06	0.82171				1069.1	1.90194
		773.739	0.51485				1070.14	0.75724				1070.17	1.78649
		774.511	0.49472				1071.21	0.71524				1071.24	1.72638
		775.282	0.46983				1072.28	0.7002				1072.31	1.72957
		776.054	0.44144				1073.35	0.7134				1073.38	1.7948
		776.826	0.41104				1074.42	0.75272				1074.45	1.91174
		777.598	0.38028				1075.5	0.81292				1075.52	2.06252
		778.369	0.35077				1076.57	0.88631				1076.59	2.22437
		779.141	0.32397				1077.64	0.9636				1077.65	2.37295
		779.913	0.3011				1078.71	1.03509				1078.72	2.48591
		780.685	0.28303				1079.78	1.09178				1079.79	2.54614
		781.456	0.27021				1080.86	1.12647				1080.86	2.54427
		782.228	0.26267				1081.93	1.13459				1081.93	2.48001
		783	0.26002				1083	1.11477				1083	2.36218

## Sheet: Figure 4
Figure 4a										Figure 4b
			g=0GHz	g=8GHz	g=16 GHz
Frequency (GHz)	Amplitude									Freq (GHz)	error	delt (f)	error			Freq (GHz)	error	delt (f)	error			Freq(GHz)	delt(f)	delt(f)
10	0.00298	0.00174	0.00401	0.00251	0.0033					4.9	0.10996	5.09	0.54378			4.9	0.10996	--	0.54378			20	4.23598	4.03801
10.0159	0.00298	0.00174	0.00401	0.00251	0.0033					4.6	0.14922	5.5	0.73796			4.6	0.14922	--	0.73796			19.9	4.24113	4.02796
10.0318	0.00298	0.00174	0.00401	0.00251	0.0033					20.09	0.14088	5.72	0.69673			20.09	0.14088	--	0.69673			19.8	4.24632	4.01791
10.0478	0.00298	0.00174	0.00401	0.00252	0.0033					3.45	0.13874	6.66	0.68615			3.45	0.13874	2.09	0.68615			19.7	4.25154	4.00785
10.0637	0.00298	0.00174	0.00401	0.00252	0.0033					5.29	0.14644	5.47	0.72422			5.29	0.14644	1.71	0.72422			19.6	4.2568	3.99779
10.0796	0.00298	0.00174	0.00401	0.00252	0.0033					2.07	0.12692	6.29	0.62769			2.07	0.12692	1.19	0.62769			19.5	4.2621	3.98773
10.0955	0.00298	0.00174	0.00401	0.00252	0.0033					15.73	0.15311	3.83	0.75722			15.73	0.15311	--	0.75722			19.4	4.26744	3.97766
10.1114	0.00298	0.00174	0.00401	0.00252	0.0033					8.72	0.12831	6.32	0.63456			8.72	0.12831	--	0.63456			19.3	4.27281	3.96759
10.1273	0.00298	0.00174	0.00401	0.00252	0.0033					7.79	0.17051	6.84	0.84327			7.79	0.17051	--	0.84327			19.2	4.27822	3.95752
10.1432	0.00298	0.00174	0.00402	0.00252	0.0033					14.38	0.13633	--	0.67421			14.38	0.13633	--	0.67421			19.1	4.28368	3.94743
10.1592	0.00298	0.00174	0.00402	0.00252	0.0033					4.8	0.14528	4.69	0.71847			4.8	0.14528	1.73	0.71847			19	4.28917	3.93734
10.1751	0.00299	0.00174	0.00402	0.00252	0.0033					5.16	0.14337	6.55	0.70901			5.16	0.14337	2.7	0.70901			18.9	4.2947	3.92725
10.191	0.00299	0.00174	0.00402	0.00252	0.0033					18.97	0.16229	4.87	0.80261			18.97	0.16229	3.48	0.80261			18.8	4.30028	3.91714
10.2069	0.00299	0.00174	0.00402	0.00252	0.0033					11.98	0.15523	6.16	0.76769			11.98	0.15523	3.18	0.76769			18.7	4.3059	3.90703
10.2228	0.00299	0.00174	0.00402	0.00252	0.0033					15.97	0.16218	5.31	0.80204			15.97	0.16218	--	0.80204			18.6	4.31155	3.8969
10.2387	0.00299	0.00174	0.00402	0.00252	0.0033					4.68	0.14287	7.29	0.70653			4.68	0.14287	3.39	0.70653			18.5	4.31725	3.88677
10.2546	0.00299	0.00174	0.00402	0.00253	0.00331					2.8	0.12758	5.48	0.63096			2.8	0.12758	--	0.63096			18.4	4.323	3.87663
10.2706	0.00299	0.00174	0.00402	0.00253	0.00331					2.97	0.13861	6.32	0.68547			2.97	0.13861	--	0.68547			18.3	4.32879	3.86647
10.2865	0.00299	0.00175	0.00403	0.00253	0.00331					10.27	0.14248	4.62	0.70462			10.27	0.14248	--	0.70462			18.2	4.33462	3.8563
10.3024	0.00299	0.00175	0.00403	0.00253	0.00331					0.93	0.16161	9.46	0.79923			0.93	0.16161	0.66	0.79923			18.1	4.34049	3.84612
10.3183	0.00299	0.00175	0.00403	0.00253	0.00331					14.93	0.14034	--	0.69403			14.93	0.14034	3.49	0.69403			18	4.34642	3.83593
10.3342	0.00299	0.00175	0.00403	0.00253	0.00331					11.73	0.17812	6.1	0.88088			11.73	0.17812	3.56	0.88088			17.9	4.35238	3.82572
10.3501	0.00299	0.00175	0.00403	0.00253	0.00331					4.68	0.14075	--	0.69606			4.68	0.14075	--	0.69606			17.8	4.3584	3.8155
10.3661	0.00299	0.00175	0.00403	0.00253	0.00331					22.57	0.13221	--	0.65382			22.57	0.13221	1.99	0.65382			17.7	4.36446	3.80526
10.382	0.00299	0.00175	0.00403	0.00253	0.00331					0.29	0.1446	6.28	0.71509			0.29	0.1446	0.11	0.71509			17.6	4.37057	3.795
10.3979	0.00299	0.00175	0.00403	0.00253	0.00331					1.87	0.12547	6.93	0.62048			1.87	0.12547	1.04	0.62048			17.5	4.37673	3.78473
10.4138	0.00299	0.00175	0.00403	0.00253	0.00331					6.71	0.14075	5.38	0.69606			6.71	0.14075	3.63	0.69606			17.4	4.38293	3.77444
10.4297	0.00299	0.00175	0.00403	0.00253	0.00331					6.71	0.14075	4.09	0.69606			6.71	0.14075	--	0.69606			17.3	4.38919	3.76413
10.4456	0.003	0.00175	0.00404	0.00253	0.00331					13.84	0.16161	--	0.79923			13.84	0.16161	2.31	0.79923			17.2	4.39549	3.75379
10.4616	0.003	0.00175	0.00404	0.00254	0.00331					4.68	0.14927	6.07	0.73818			4.68	0.14927	2.2	0.73818			17.1	4.40185	3.74344
10.4775	0.003	0.00175	0.00404	0.00254	0.00331					13.54	0.14886	4.41	0.73615			13.54	0.14886	--	0.73615			17	4.40826	3.73307
10.4934	0.003	0.00175	0.00404	0.00254	0.00332					5.77	0.13009	7.48	0.64335			5.77	0.13009	2.91	0.64335			16.9	4.41472	3.72268
10.5093	0.003	0.00175	0.00404	0.00254	0.00332					5.77	0.13009	8.42	0.64335			5.77	0.13009	4.21	0.64335			16.8	4.42123	3.71226
10.5252	0.003	0.00175	0.00404	0.00254	0.00332					7.96	0.15141	4.58	0.74877			7.96	0.15141	3.5	0.74877			16.7	4.4278	3.70182
10.5411	0.003	0.00175	0.00404	0.00254	0.00332					2.95	0.12581	7.02	0.62217			2.95	0.12581	2.18	0.62217			16.6	4.43442	3.69135
10.557	0.003	0.00175	0.00404	0.00254	0.00332					20.59	0.15992	--	0.79089			20.59	0.15992	3.14	0.79089			16.5	4.4411	3.68086
10.573	0.003	0.00175	0.00404	0.00254	0.00332					14.05	0.15781	4.99	0.78042			14.05	0.15781	3.26	0.78042			16.4	4.44783	3.67034
10.5889	0.003	0.00175	0.00405	0.00254	0.00332					12.31	0.13649	5.96	0.675			12.31	0.13649	3.64	0.675			16.3	4.45462	3.6598
10.6048	0.003	0.00175	0.00405	0.00254	0.00332					25.29	0.15355	2.62	0.75936			25.29	0.15355	--	0.75936			16.2	4.46147	3.64922
10.6207	0.003	0.00175	0.00405	0.00254	0.00332					3.73	0.12758	5.76	0.63096			3.73	0.12758	1.76	0.63096			16.1	4.46838	3.63862
10.6366	0.003	0.00175	0.00405	0.00254	0.00332					14.4	0.10076	5.92	0.49828			14.4	0.10076	4.13	0.49828			16	4.47534	3.62799
10.6525	0.003	0.00175	0.00405	0.00255	0.00332																	15.9	4.48236	3.61732
10.6684	0.003	0.00175	0.00405	0.00255	0.00332																	15.8	4.48945	3.60663
10.6844	0.003	0.00176	0.00405	0.00255	0.00332																	15.7	4.4966	3.5959
10.7003	0.00301	0.00176	0.00405	0.00255	0.00332																	15.6	4.50381	3.58514
10.7162	0.00301	0.00176	0.00405	0.00255	0.00332																	15.5	4.51108	3.57434
10.7321	0.00301	0.00176	0.00406	0.00255	0.00333																	15.4	4.51842	3.5635
10.748	0.00301	0.00176	0.00406	0.00255	0.00333																	15.3	4.52582	3.55263
10.7639	0.00301	0.00176	0.00406	0.00255	0.00333																	15.2	4.53329	3.54172
10.7799	0.00301	0.00176	0.00406	0.00255	0.00333																	15.1	4.54082	3.53077
10.7958	0.00301	0.00176	0.00406	0.00255	0.00333																	15	4.54843	3.51978
10.8117	0.00301	0.00176	0.00406	0.00255	0.00333																	14.9	4.5561	3.50875
10.8276	0.00301	0.00176	0.00406	0.00255	0.00333																	14.8	4.56384	3.49768
10.8435	0.00301	0.00176	0.00406	0.00255	0.00333																	14.7	4.57166	3.48656
10.8594	0.00301	0.00176	0.00406	0.00256	0.00333																	14.6	4.57954	3.4754
10.8753	0.00301	0.00176	0.00407	0.00256	0.00333																	14.5	4.5875	3.46419
10.8913	0.00301	0.00176	0.00407	0.00256	0.00333																	14.4	4.59553	3.45294
10.9072	0.00301	0.00176	0.00407	0.00256	0.00333																	14.3	4.60364	3.44163
10.9231	0.00301	0.00176	0.00407	0.00256	0.00333																	14.2	4.61183	3.43028
10.939	0.00301	0.00176	0.00407	0.00256	0.00333																	14.1	4.62009	3.41887
10.9549	0.00302	0.00176	0.00407	0.00256	0.00334																	14	4.62844	3.40742
10.9709	0.00302	0.00176	0.00407	0.00256	0.00334																	13.9	4.63686	3.39591
10.9868	0.00302	0.00176	0.00407	0.00256	0.00334																	13.8	4.64536	3.38434
11.0027	0.00302	0.00176	0.00407	0.00256	0.00334																	13.7	4.65395	3.37272
11.0186	0.00302	0.00176	0.00408	0.00256	0.00334																	13.6	4.66262	3.36104
11.0345	0.00302	0.00176	0.00408	0.00256	0.00334																	13.5	4.67138	3.3493
11.0504	0.00302	0.00177	0.00408	0.00257	0.00334																	13.4	4.68022	3.3375
11.0663	0.00302	0.00177	0.00408	0.00257	0.00334																	13.3	4.68915	3.32564
11.0823	0.00302	0.00177	0.00408	0.00257	0.00334																	13.2	4.69817	3.31372
11.0982	0.00302	0.00177	0.00408	0.00257	0.00334																	13.1	4.70728	3.30173
11.1141	0.00302	0.00177	0.00408	0.00257	0.00334																	13	4.71648	3.28967
11.13	0.00302	0.00177	0.00408	0.00257	0.00334																	12.9	4.72577	3.27755
11.1459	0.00302	0.00177	0.00408	0.00257	0.00334																	12.8	4.73517	3.26536
11.1618	0.00302	0.00177	0.00409	0.00257	0.00334																	12.7	4.74465	3.25309
11.1777	0.00302	0.00177	0.00409	0.00257	0.00335																	12.6	4.75424	3.24075
11.1937	0.00303	0.00177	0.00409	0.00257	0.00335																	12.5	4.76392	3.22834
11.2096	0.00303	0.00177	0.00409	0.00257	0.00335																	12.4	4.77371	3.21586
11.2255	0.00303	0.00177	0.00409	0.00258	0.00335																	12.3	4.7836	3.20329
11.2414	0.00303	0.00177	0.00409	0.00258	0.00335																	12.2	4.79359	3.19064
11.2573	0.00303	0.00177	0.00409	0.00258	0.00335																	12.1	4.80369	3.17792
11.2732	0.00303	0.00177	0.00409	0.00258	0.00335																	12	4.8139	3.16511
11.2892	0.00303	0.00177	0.0041	0.00258	0.00335																	11.9	4.82422	3.15221
11.3051	0.00303	0.00177	0.0041	0.00258	0.00335																	11.8	4.83465	3.13923
11.321	0.00303	0.00177	0.0041	0.00258	0.00335																	11.7	4.84519	3.12616
11.3369	0.00303	0.00177	0.0041	0.00258	0.00335																	11.6	4.85585	3.113
11.3528	0.00303	0.00177	0.0041	0.00258	0.00335																	11.5	4.86663	3.09974
11.3687	0.00303	0.00177	0.0041	0.00258	0.00335																	11.4	4.87752	3.08639
11.3847	0.00303	0.00178	0.0041	0.00258	0.00335																	11.3	4.88854	3.07295
11.4006	0.00303	0.00178	0.0041	0.00258	0.00336																	11.2	4.89968	3.0594
11.4165	0.00303	0.00178	0.0041	0.00259	0.00336																	11.1	4.91094	3.04575
11.4324	0.00304	0.00178	0.00411	0.00259	0.00336																	11	4.92234	3.032
11.4483	0.00304	0.00178	0.00411	0.00259	0.00336																	10.9	4.93386	3.01814
11.4642	0.00304	0.00178	0.00411	0.00259	0.00336																	10.8	4.94551	3.00418
11.4801	0.00304	0.00178	0.00411	0.00259	0.00336																	10.7	4.9573	2.9901
11.4961	0.00304	0.00178	0.00411	0.00259	0.00336																	10.6	4.96923	2.97591
11.512	0.00304	0.00178	0.00411	0.00259	0.00336																	10.5	4.98129	2.96161
11.5279	0.00304	0.00178	0.00411	0.00259	0.00336																	10.4	4.9935	2.94719
11.5438	0.00304	0.00178	0.00411	0.00259	0.00336																	10.3	5.00585	2.93265
11.5597	0.00304	0.00178	0.00412	0.00259	0.00336																	10.2	5.01834	2.91798
11.5756	0.00304	0.00178	0.00412	0.00259	0.00336																	10.1	5.03099	2.90319
11.5915	0.00304	0.00178	0.00412	0.0026	0.00336																	10	5.04378	2.88828
11.6075	0.00304	0.00178	0.00412	0.0026	0.00336																	9.9	5.05673	2.87323
11.6234	0.00304	0.00178	0.00412	0.0026	0.00337																	9.8	5.06984	2.85805
11.6393	0.00305	0.00178	0.00412	0.0026	0.00337																	9.7	5.0831	2.84273
11.6552	0.00305	0.00178	0.00412	0.0026	0.00337																	9.6	5.09653	2.82727
11.6711	0.00305	0.00178	0.00412	0.0026	0.00337																	9.5	5.11012	2.81167
11.687	0.00305	0.00178	0.00413	0.0026	0.00337																	9.4	5.12388	2.79592
11.703	0.00305	0.00179	0.00413	0.0026	0.00337																	9.3	5.13782	2.78003
11.7189	0.00305	0.00179	0.00413	0.0026	0.00337																	9.2	5.15192	2.76399
11.7348	0.00305	0.00179	0.00413	0.0026	0.00337																	9.1	5.16621	2.74779
11.7507	0.00305	0.00179	0.00413	0.0026	0.00337																	9	5.18067	2.73143
11.7666	0.00305	0.00179	0.00413	0.00261	0.00337																	8.9	5.19532	2.71491
11.7825	0.00305	0.00179	0.00413	0.00261	0.00337																	8.8	5.21015	2.69823
11.7985	0.00305	0.00179	0.00413	0.00261	0.00337																	8.7	5.22517	2.68138
11.8144	0.00305	0.00179	0.00414	0.00261	0.00337																	8.6	5.24039	2.66436
11.8303	0.00305	0.00179	0.00414	0.00261	0.00338																	8.5	5.25581	2.64717
11.8462	0.00305	0.00179	0.00414	0.00261	0.00338																	8.4	5.27142	2.62979
11.8621	0.00306	0.00179	0.00414	0.00261	0.00338																	8.3	5.28724	2.61224
11.878	0.00306	0.00179	0.00414	0.00261	0.00338																	8.2	5.30327	2.5945
11.8939	0.00306	0.00179	0.00414	0.00261	0.00338																	8.1	5.3195	2.57657
11.9099	0.00306	0.00179	0.00414	0.00261	0.00338																	8	5.33596	2.55845
11.9258	0.00306	0.00179	0.00414	0.00261	0.00338																	7.9	5.35263	2.54013
11.9417	0.00306	0.00179	0.00415	0.00262	0.00338																	7.8	5.36953	2.5216
11.9576	0.00306	0.00179	0.00415	0.00262	0.00338																	7.7	5.38665	2.50288
11.9735	0.00306	0.00179	0.00415	0.00262	0.00338																	7.6	5.404	2.48394
11.9894	0.00306	0.00179	0.00415	0.00262	0.00338																	7.5	5.42159	2.46479
12.0053	0.00306	0.00179	0.00415	0.00262	0.00338																	7.4	5.43942	2.44543
12.0213	0.00306	0.0018	0.00415	0.00262	0.00338																	7.3	5.45749	2.42584
12.0372	0.00306	0.0018	0.00415	0.00262	0.00339																	7.2	5.47581	2.40602
12.0531	0.00306	0.0018	0.00415	0.00262	0.00339																	7.1	5.49438	2.38598
12.069	0.00307	0.0018	0.00416	0.00262	0.00339																	7	5.51321	2.3657
12.0849	0.00307	0.0018	0.00416	0.00262	0.00339																	6.9	5.53231	2.34518
12.1008	0.00307	0.0018	0.00416	0.00262	0.00339																	6.8	5.55166	2.32441
12.1168	0.00307	0.0018	0.00416	0.00263	0.00339																	6.7	5.57129	2.30339
12.1327	0.00307	0.0018	0.00416	0.00263	0.00339																	6.6	5.5912	2.28213
12.1486	0.00307	0.0018	0.00416	0.00263	0.00339																	6.5	5.61138	2.2606
12.1645	0.00307	0.0018	0.00416	0.00263	0.00339																	6.4	5.63185	2.23881
12.1804	0.00307	0.0018	0.00416	0.00263	0.00339																	6.3	5.65261	2.21674
12.1963	0.00307	0.0018	0.00417	0.00263	0.00339																	6.2	5.67367	2.19441
12.2122	0.00307	0.0018	0.00417	0.00263	0.00339																	6.1	5.69502	2.17179
12.2282	0.00307	0.0018	0.00417	0.00263	0.0034																	6	5.71668	2.14889
12.2441	0.00307	0.0018	0.00417	0.00263	0.0034																	5.9	5.73866	2.12571
12.26	0.00307	0.0018	0.00417	0.00263	0.0034																	5.8	5.76095	2.10222
12.2759	0.00308	0.0018	0.00417	0.00264	0.0034																	5.7	5.78356	2.07844
12.2918	0.00308	0.0018	0.00417	0.00264	0.0034																	5.6	5.80649	2.05435
12.3078	0.00308	0.00181	0.00417	0.00264	0.0034																	5.5	5.82976	2.02995
12.3237	0.00308	0.00181	0.00418	0.00264	0.0034																	5.4	5.85337	2.00523
12.3396	0.00308	0.00181	0.00418	0.00264	0.0034																	5.3	5.87732	1.98019
12.3555	0.00308	0.00181	0.00418	0.00264	0.0034																	5.2	5.90162	1.95482
12.3714	0.00308	0.00181	0.00418	0.00264	0.0034																	5.1	5.92628	1.92912
12.3873	0.00308	0.00181	0.00418	0.00264	0.0034																	5	5.95129	1.90307
12.4032	0.00308	0.00181	0.00418	0.00264	0.0034																	4.9	5.97667	1.87669
12.4192	0.00308	0.00181	0.00418	0.00264	0.0034																	4.8	6.00242	1.84995
12.4351	0.00308	0.00181	0.00418	0.00264	0.00341																	4.7	6.02856	1.82285
12.451	0.00308	0.00181	0.00419	0.00265	0.00341																	4.6	6.05507	1.79539
12.4669	0.00309	0.00181	0.00419	0.00265	0.00341																	4.5	6.08198	1.76756
12.4828	0.00309	0.00181	0.00419	0.00265	0.00341																	4.4	6.10927	1.73936
12.4987	0.00309	0.00181	0.00419	0.00265	0.00341																	4.3	6.13698	1.71078
12.5146	0.00309	0.00181	0.00419	0.00265	0.00341																	4.2	6.16508	1.68181
12.5306	0.00309	0.00181	0.00419	0.00265	0.00341																	4.1	6.1936	1.65245
12.5465	0.00309	0.00181	0.00419	0.00265	0.00341																	4	6.22254	1.62269
12.5624	0.00309	0.00181	0.0042	0.00265	0.00341																	3.9	6.25191	1.59252
12.5783	0.00309	0.00181	0.0042	0.00265	0.00341																	3.8	6.28171	1.56195
12.5942	0.00309	0.00182	0.0042	0.00265	0.00341																	3.7	6.31194	1.53096
12.6101	0.00309	0.00182	0.0042	0.00266	0.00341																	3.6	6.34261	1.49954
12.6261	0.00309	0.00182	0.0042	0.00266	0.00342																	3.5	6.37374	1.4677
12.642	0.00309	0.00182	0.0042	0.00266	0.00342																	3.4	6.40531	1.43543
12.6579	0.0031	0.00182	0.0042	0.00266	0.00342																	3.3	6.43735	1.40272
12.6738	0.0031	0.00182	0.0042	0.00266	0.00342																	3.2	6.46985	1.36956
12.6897	0.0031	0.00182	0.00421	0.00266	0.00342																	3.1	6.50283	1.33595
12.7056	0.0031	0.00182	0.00421	0.00266	0.00342																	3	6.53628	1.30188
12.7216	0.0031	0.00182	0.00421	0.00266	0.00342																	2.9	6.57021	1.26735
12.7375	0.0031	0.00182	0.00421	0.00266	0.00342																	2.8	6.60463	1.23236
12.7534	0.0031	0.00182	0.00421	0.00266	0.00342																	2.7	6.63955	1.19689
12.7693	0.0031	0.00182	0.00421	0.00267	0.00342																	2.6	6.67496	1.16094
12.7852	0.0031	0.00182	0.00421	0.00267	0.00342																	2.5	6.71087	1.12451
12.8011	0.0031	0.00182	0.00422	0.00267	0.00342																	2.4	6.7473	1.0876
12.817	0.0031	0.00182	0.00422	0.00267	0.00343																	2.3	6.78423	1.05019
12.833	0.0031	0.00182	0.00422	0.00267	0.00343																	2.2	6.82169	1.01228
12.8489	0.00311	0.00182	0.00422	0.00267	0.00343																	2.1	6.85967	0.97387
12.8648	0.00311	0.00183	0.00422	0.00267	0.00343																	2	6.89817	0.93495
12.8807	0.00311	0.00183	0.00422	0.00267	0.00343																	1.9	6.93721	0.89552
12.8966	0.00311	0.00183	0.00422	0.00267	0.00343																	1.8	6.97678	0.85558
12.9125	0.00311	0.00183	0.00423	0.00267	0.00343																	1.7	7.01689	0.81511
12.9284	0.00311	0.00183	0.00423	0.00268	0.00343																	1.6	7.05755	0.77413
12.9444	0.00311	0.00183	0.00423	0.00268	0.00343																	1.5	7.09875	0.73261
12.9603	0.00311	0.00183	0.00423	0.00268	0.00343																	1.4	7.1405	0.69057
12.9762	0.00311	0.00183	0.00423	0.00268	0.00343																	1.3	7.18281	0.64799
12.9921	0.00311	0.00183	0.00423	0.00268	0.00343																	1.2	7.22567	0.60488
13.008	0.00311	0.00183	0.00423	0.00268	0.00344																	1.1	7.2691	0.56122
13.0239	0.00312	0.00183	0.00424	0.00268	0.00344																	1	7.31308	0.51702
13.0399	0.00312	0.00183	0.00424	0.00268	0.00344																	0.9	7.35763	0.47228
13.0558	0.00312	0.00183	0.00424	0.00268	0.00344																	0.8	7.40275	0.42699
13.0717	0.00312	0.00183	0.00424	0.00268	0.00344																	0.7	7.44844	0.38115
13.0876	0.00312	0.00183	0.00424	0.00269	0.00344																	0.6	7.4947	0.33476
13.1035	0.00312	0.00183	0.00424	0.00269	0.00344																	0.5	7.54153	0.28782
13.1194	0.00312	0.00184	0.00424	0.00269	0.00344																	0.4	7.58894	0.24032
13.1354	0.00312	0.00184	0.00424	0.00269	0.00344																	0.3	7.63692	0.19227
13.1513	0.00312	0.00184	0.00425	0.00269	0.00344																	0.2	7.68548	0.14366
13.1672	0.00312	0.00184	0.00425	0.00269	0.00344																	0.1	7.73461	0.0945
13.1831	0.00312	0.00184	0.00425	0.00269	0.00345																	-4.26326e-14	7.78433	0.04477
13.199	0.00312	0.00184	0.00425	0.00269	0.00345
13.2149	0.00313	0.00184	0.00425	0.00269	0.00345
13.2309	0.00313	0.00184	0.00425	0.0027	0.00345
13.2468	0.00313	0.00184	0.00425	0.0027	0.00345
13.2627	0.00313	0.00184	0.00426	0.0027	0.00345
13.2786	0.00313	0.00184	0.00426	0.0027	0.00345
13.2945	0.00313	0.00184	0.00426	0.0027	0.00345
13.3104	0.00313	0.00184	0.00426	0.0027	0.00345
13.3263	0.00313	0.00184	0.00426	0.0027	0.00345
13.3422	0.00313	0.00184	0.00426	0.0027	0.00345
13.3582	0.00313	0.00184	0.00426	0.0027	0.00346
13.3741	0.00313	0.00185	0.00427	0.0027	0.00346
13.39	0.00314	0.00185	0.00427	0.00271	0.00346
13.4059	0.00314	0.00185	0.00427	0.00271	0.00346
13.4218	0.00314	0.00185	0.00427	0.00271	0.00346
13.4377	0.00314	0.00185	0.00427	0.00271	0.00346
13.4537	0.00314	0.00185	0.00427	0.00271	0.00346
13.4696	0.00314	0.00185	0.00427	0.00271	0.00346
13.4855	0.00314	0.00185	0.00428	0.00271	0.00346
13.5014	0.00314	0.00185	0.00428	0.00271	0.00346
13.5173	0.00314	0.00185	0.00428	0.00271	0.00346
13.5332	0.00314	0.00185	0.00428	0.00272	0.00346
13.5492	0.00315	0.00185	0.00428	0.00272	0.00347
13.5651	0.00315	0.00185	0.00428	0.00272	0.00347
13.581	0.00315	0.00185	0.00429	0.00272	0.00347
13.5969	0.00315	0.00185	0.00429	0.00272	0.00347
13.6128	0.00315	0.00186	0.00429	0.00272	0.00347
13.6287	0.00315	0.00186	0.00429	0.00272	0.00347
13.6447	0.00315	0.00186	0.00429	0.00272	0.00347
13.6606	0.00315	0.00186	0.00429	0.00272	0.00347
13.6765	0.00315	0.00186	0.00429	0.00273	0.00347
13.6924	0.00315	0.00186	0.0043	0.00273	0.00347
13.7083	0.00315	0.00186	0.0043	0.00273	0.00347
13.7242	0.00316	0.00186	0.0043	0.00273	0.00348
13.7401	0.00316	0.00186	0.0043	0.00273	0.00348
13.7561	0.00316	0.00186	0.0043	0.00273	0.00348
13.772	0.00316	0.00186	0.0043	0.00273	0.00348
13.7879	0.00316	0.00186	0.0043	0.00273	0.00348
13.8038	0.00316	0.00186	0.00431	0.00273	0.00348
13.8197	0.00316	0.00186	0.00431	0.00274	0.00348
13.8356	0.00316	0.00186	0.00431	0.00274	0.00348
13.8515	0.00316	0.00187	0.00431	0.00274	0.00348
13.8675	0.00316	0.00187	0.00431	0.00274	0.00348
13.8834	0.00317	0.00187	0.00431	0.00274	0.00349
13.8993	0.00317	0.00187	0.00432	0.00274	0.00349
13.9152	0.00317	0.00187	0.00432	0.00274	0.00349
13.9311	0.00317	0.00187	0.00432	0.00274	0.00349
13.947	0.00317	0.00187	0.00432	0.00274	0.00349
13.963	0.00317	0.00187	0.00432	0.00275	0.00349
13.9789	0.00317	0.00187	0.00432	0.00275	0.00349
13.9948	0.00317	0.00187	0.00432	0.00275	0.00349
14.0107	0.00317	0.00187	0.00433	0.00275	0.00349
14.0266	0.00317	0.00187	0.00433	0.00275	0.00349
14.0425	0.00317	0.00187	0.00433	0.00275	0.00349
14.0585	0.00318	0.00187	0.00433	0.00275	0.0035
14.0744	0.00318	0.00187	0.00433	0.00275	0.0035
14.0903	0.00318	0.00188	0.00433	0.00275	0.0035
14.1062	0.00318	0.00188	0.00433	0.00276	0.0035
14.1221	0.00318	0.00188	0.00434	0.00276	0.0035
14.138	0.00318	0.00188	0.00434	0.00276	0.0035
14.1539	0.00318	0.00188	0.00434	0.00276	0.0035
14.1699	0.00318	0.00188	0.00434	0.00276	0.0035
14.1858	0.00318	0.00188	0.00434	0.00276	0.0035
14.2017	0.00318	0.00188	0.00434	0.00276	0.0035
14.2176	0.00319	0.00188	0.00435	0.00276	0.00351
14.2335	0.00319	0.00188	0.00435	0.00276	0.00351
14.2494	0.00319	0.00188	0.00435	0.00277	0.00351
14.2653	0.00319	0.00188	0.00435	0.00277	0.00351
14.2813	0.00319	0.00188	0.00435	0.00277	0.00351
14.2972	0.00319	0.00188	0.00435	0.00277	0.00351
14.3131	0.00319	0.00189	0.00436	0.00277	0.00351
14.329	0.00319	0.00189	0.00436	0.00277	0.00351
14.3449	0.00319	0.00189	0.00436	0.00277	0.00351
14.3608	0.0032	0.00189	0.00436	0.00277	0.00351
14.3768	0.0032	0.00189	0.00436	0.00277	0.00351
14.3927	0.0032	0.00189	0.00436	0.00278	0.00352
14.4086	0.0032	0.00189	0.00436	0.00278	0.00352
14.4245	0.0032	0.00189	0.00437	0.00278	0.00352
14.4404	0.0032	0.00189	0.00437	0.00278	0.00352
14.4563	0.0032	0.00189	0.00437	0.00278	0.00352
14.4723	0.0032	0.00189	0.00437	0.00278	0.00352
14.4882	0.0032	0.00189	0.00437	0.00278	0.00352
14.5041	0.0032	0.00189	0.00437	0.00278	0.00352
14.52	0.00321	0.00189	0.00438	0.00279	0.00352
14.5359	0.00321	0.0019	0.00438	0.00279	0.00352
14.5518	0.00321	0.0019	0.00438	0.00279	0.00353
14.5678	0.00321	0.0019	0.00438	0.00279	0.00353
14.5837	0.00321	0.0019	0.00438	0.00279	0.00353
14.5996	0.00321	0.0019	0.00438	0.00279	0.00353
14.6155	0.00321	0.0019	0.00439	0.00279	0.00353
14.6314	0.00321	0.0019	0.00439	0.00279	0.00353
14.6473	0.00321	0.0019	0.00439	0.00279	0.00353
14.6632	0.00321	0.0019	0.00439	0.0028	0.00353
14.6792	0.00322	0.0019	0.00439	0.0028	0.00353
14.6951	0.00322	0.0019	0.00439	0.0028	0.00353
14.711	0.00322	0.0019	0.0044	0.0028	0.00354
14.7269	0.00322	0.0019	0.0044	0.0028	0.00354
14.7428	0.00322	0.0019	0.0044	0.0028	0.00354
14.7587	0.00322	0.00191	0.0044	0.0028	0.00354
14.7746	0.00322	0.00191	0.0044	0.0028	0.00354
14.7906	0.00322	0.00191	0.0044	0.00281	0.00354
14.8065	0.00322	0.00191	0.00441	0.00281	0.00354
14.8224	0.00323	0.00191	0.00441	0.00281	0.00354
14.8383	0.00323	0.00191	0.00441	0.00281	0.00354
14.8542	0.00323	0.00191	0.00441	0.00281	0.00354
14.8701	0.00323	0.00191	0.00441	0.00281	0.00355
14.8861	0.00323	0.00191	0.00441	0.00281	0.00355
14.902	0.00323	0.00191	0.00442	0.00281	0.00355
14.9179	0.00323	0.00191	0.00442	0.00282	0.00355
14.9338	0.00323	0.00191	0.00442	0.00282	0.00355
14.9497	0.00323	0.00191	0.00442	0.00282	0.00355
14.9656	0.00324	0.00192	0.00442	0.00282	0.00355
14.9816	0.00324	0.00192	0.00442	0.00282	0.00355
14.9975	0.00324	0.00192	0.00443	0.00282	0.00355
15.0134	0.00324	0.00192	0.00443	0.00282	0.00356
15.0293	0.00324	0.00192	0.00443	0.00282	0.00356
15.0452	0.00324	0.00192	0.00443	0.00283	0.00356
15.0611	0.00324	0.00192	0.00443	0.00283	0.00356
15.077	0.00324	0.00192	0.00443	0.00283	0.00356
15.093	0.00324	0.00192	0.00444	0.00283	0.00356
15.1089	0.00325	0.00192	0.00444	0.00283	0.00356
15.1248	0.00325	0.00192	0.00444	0.00283	0.00356
15.1407	0.00325	0.00192	0.00444	0.00283	0.00356
15.1566	0.00325	0.00192	0.00444	0.00283	0.00356
15.1725	0.00325	0.00193	0.00444	0.00284	0.00357
15.1884	0.00325	0.00193	0.00445	0.00284	0.00357
15.2044	0.00325	0.00193	0.00445	0.00284	0.00357
15.2203	0.00325	0.00193	0.00445	0.00284	0.00357
15.2362	0.00325	0.00193	0.00445	0.00284	0.00357
15.2521	0.00326	0.00193	0.00445	0.00284	0.00357
15.268	0.00326	0.00193	0.00445	0.00284	0.00357
15.2839	0.00326	0.00193	0.00446	0.00284	0.00357
15.2999	0.00326	0.00193	0.00446	0.00285	0.00357
15.3158	0.00326	0.00193	0.00446	0.00285	0.00357
15.3317	0.00326	0.00193	0.00446	0.00285	0.00358
15.3476	0.00326	0.00193	0.00446	0.00285	0.00358
15.3635	0.00326	0.00193	0.00446	0.00285	0.00358
15.3794	0.00326	0.00194	0.00447	0.00285	0.00358
15.3954	0.00327	0.00194	0.00447	0.00285	0.00358
15.4113	0.00327	0.00194	0.00447	0.00285	0.00358
15.4272	0.00327	0.00194	0.00447	0.00286	0.00358
15.4431	0.00327	0.00194	0.00447	0.00286	0.00358
15.459	0.00327	0.00194	0.00447	0.00286	0.00358
15.4749	0.00327	0.00194	0.00448	0.00286	0.00359
15.4909	0.00327	0.00194	0.00448	0.00286	0.00359
15.5068	0.00327	0.00194	0.00448	0.00286	0.00359
15.5227	0.00327	0.00194	0.00448	0.00286	0.00359
15.5386	0.00328	0.00194	0.00448	0.00286	0.00359
15.5545	0.00328	0.00194	0.00449	0.00287	0.00359
15.5704	0.00328	0.00195	0.00449	0.00287	0.00359
15.5863	0.00328	0.00195	0.00449	0.00287	0.00359
15.6022	0.00328	0.00195	0.00449	0.00287	0.00359
15.6182	0.00328	0.00195	0.00449	0.00287	0.0036
15.6341	0.00328	0.00195	0.00449	0.00287	0.0036
15.65	0.00328	0.00195	0.0045	0.00287	0.0036
15.6659	0.00329	0.00195	0.0045	0.00287	0.0036
15.6818	0.00329	0.00195	0.0045	0.00288	0.0036
15.6977	0.00329	0.00195	0.0045	0.00288	0.0036
15.7137	0.00329	0.00195	0.0045	0.00288	0.0036
15.7296	0.00329	0.00195	0.0045	0.00288	0.0036
15.7455	0.00329	0.00195	0.00451	0.00288	0.0036
15.7614	0.00329	0.00195	0.00451	0.00288	0.00361
15.7773	0.00329	0.00196	0.00451	0.00288	0.00361
15.7932	0.00329	0.00196	0.00451	0.00289	0.00361
15.8092	0.0033	0.00196	0.00451	0.00289	0.00361
15.8251	0.0033	0.00196	0.00452	0.00289	0.00361
15.841	0.0033	0.00196	0.00452	0.00289	0.00361
15.8569	0.0033	0.00196	0.00452	0.00289	0.00361
15.8728	0.0033	0.00196	0.00452	0.00289	0.00361
15.8887	0.0033	0.00196	0.00452	0.00289	0.00361
15.9047	0.0033	0.00196	0.00452	0.00289	0.00362
15.9206	0.0033	0.00196	0.00453	0.0029	0.00362
15.9365	0.00331	0.00196	0.00453	0.0029	0.00362
15.9524	0.00331	0.00196	0.00453	0.0029	0.00362
15.9683	0.00331	0.00197	0.00453	0.0029	0.00362
15.9842	0.00331	0.00197	0.00453	0.0029	0.00362
16.0001	0.00331	0.00197	0.00454	0.0029	0.00362
16.0161	0.00331	0.00197	0.00454	0.0029	0.00362
16.032	0.00331	0.00197	0.00454	0.00291	0.00362
16.0479	0.00331	0.00197	0.00454	0.00291	0.00363
16.0638	0.00332	0.00197	0.00454	0.00291	0.00363
16.0797	0.00332	0.00197	0.00454	0.00291	0.00363
16.0956	0.00332	0.00197	0.00455	0.00291	0.00363
16.1116	0.00332	0.00197	0.00455	0.00291	0.00363
16.1275	0.00332	0.00197	0.00455	0.00291	0.00363
16.1434	0.00332	0.00198	0.00455	0.00291	0.00363
16.1593	0.00332	0.00198	0.00455	0.00292	0.00363
16.1752	0.00332	0.00198	0.00456	0.00292	0.00363
16.1911	0.00332	0.00198	0.00456	0.00292	0.00364
16.207	0.00333	0.00198	0.00456	0.00292	0.00364
16.223	0.00333	0.00198	0.00456	0.00292	0.00364
16.2389	0.00333	0.00198	0.00456	0.00292	0.00364
16.2548	0.00333	0.00198	0.00457	0.00292	0.00364
16.2707	0.00333	0.00198	0.00457	0.00293	0.00364
16.2866	0.00333	0.00198	0.00457	0.00293	0.00364
16.3025	0.00333	0.00198	0.00457	0.00293	0.00364
16.3184	0.00333	0.00198	0.00457	0.00293	0.00364
16.3344	0.00334	0.00199	0.00457	0.00293	0.00365
16.3503	0.00334	0.00199	0.00458	0.00293	0.00365
16.3662	0.00334	0.00199	0.00458	0.00293	0.00365
16.3821	0.00334	0.00199	0.00458	0.00294	0.00365
16.398	0.00334	0.00199	0.00458	0.00294	0.00365
16.4139	0.00334	0.00199	0.00458	0.00294	0.00365
16.4299	0.00334	0.00199	0.00459	0.00294	0.00365
16.4458	0.00334	0.00199	0.00459	0.00294	0.00365
16.4617	0.00335	0.00199	0.00459	0.00294	0.00366
16.4776	0.00335	0.00199	0.00459	0.00294	0.00366
16.4935	0.00335	0.00199	0.00459	0.00295	0.00366
16.5094	0.00335	0.002	0.0046	0.00295	0.00366
16.5253	0.00335	0.002	0.0046	0.00295	0.00366
16.5413	0.00335	0.002	0.0046	0.00295	0.00366
16.5572	0.00335	0.002	0.0046	0.00295	0.00366
16.5731	0.00336	0.002	0.0046	0.00295	0.00366
16.589	0.00336	0.002	0.0046	0.00295	0.00366
16.6049	0.00336	0.002	0.00461	0.00295	0.00367
16.6209	0.00336	0.002	0.00461	0.00296	0.00367
16.6368	0.00336	0.002	0.00461	0.00296	0.00367
16.6527	0.00336	0.002	0.00461	0.00296	0.00367
16.6686	0.00336	0.002	0.00461	0.00296	0.00367
16.6845	0.00336	0.002	0.00462	0.00296	0.00367
16.7004	0.00337	0.00201	0.00462	0.00296	0.00367
16.7163	0.00337	0.00201	0.00462	0.00296	0.00367
16.7323	0.00337	0.00201	0.00462	0.00297	0.00368
16.7482	0.00337	0.00201	0.00462	0.00297	0.00368
16.7641	0.00337	0.00201	0.00463	0.00297	0.00368
16.78	0.00337	0.00201	0.00463	0.00297	0.00368
16.7959	0.00337	0.00201	0.00463	0.00297	0.00368
16.8118	0.00337	0.00201	0.00463	0.00297	0.00368
16.8278	0.00338	0.00201	0.00463	0.00297	0.00368
16.8437	0.00338	0.00201	0.00464	0.00298	0.00368
16.8596	0.00338	0.00201	0.00464	0.00298	0.00369
16.8755	0.00338	0.00202	0.00464	0.00298	0.00369
16.8914	0.00338	0.00202	0.00464	0.00298	0.00369
16.9073	0.00338	0.00202	0.00464	0.00298	0.00369
16.9232	0.00338	0.00202	0.00465	0.00298	0.00369
16.9392	0.00339	0.00202	0.00465	0.00299	0.00369
16.9551	0.00339	0.00202	0.00465	0.00299	0.00369
16.971	0.00339	0.00202	0.00465	0.00299	0.00369
16.9869	0.00339	0.00202	0.00465	0.00299	0.00369
17.0028	0.00339	0.00202	0.00466	0.00299	0.0037
17.0187	0.00339	0.00202	0.00466	0.00299	0.0037
17.0346	0.00339	0.00202	0.00466	0.00299	0.0037
17.0506	0.00339	0.00203	0.00466	0.003	0.0037
17.0665	0.0034	0.00203	0.00466	0.003	0.0037
17.0824	0.0034	0.00203	0.00467	0.003	0.0037
17.0983	0.0034	0.00203	0.00467	0.003	0.0037
17.1142	0.0034	0.00203	0.00467	0.003	0.0037
17.1301	0.0034	0.00203	0.00467	0.003	0.00371
17.1461	0.0034	0.00203	0.00467	0.003	0.00371
17.162	0.0034	0.00203	0.00468	0.00301	0.00371
17.1779	0.00341	0.00203	0.00468	0.00301	0.00371
17.1938	0.00341	0.00203	0.00468	0.00301	0.00371
17.2097	0.00341	0.00204	0.00468	0.00301	0.00371
17.2256	0.00341	0.00204	0.00468	0.00301	0.00371
17.2416	0.00341	0.00204	0.00469	0.00301	0.00371
17.2575	0.00341	0.00204	0.00469	0.00301	0.00372
17.2734	0.00341	0.00204	0.00469	0.00302	0.00372
17.2893	0.00341	0.00204	0.00469	0.00302	0.00372
17.3052	0.00342	0.00204	0.00469	0.00302	0.00372
17.3211	0.00342	0.00204	0.0047	0.00302	0.00372
17.337	0.00342	0.00204	0.0047	0.00302	0.00372
17.353	0.00342	0.00204	0.0047	0.00302	0.00372
17.3689	0.00342	0.00204	0.0047	0.00303	0.00372
17.3848	0.00342	0.00205	0.0047	0.00303	0.00373
17.4007	0.00342	0.00205	0.00471	0.00303	0.00373
17.4166	0.00343	0.00205	0.00471	0.00303	0.00373
17.4325	0.00343	0.00205	0.00471	0.00303	0.00373
17.4485	0.00343	0.00205	0.00471	0.00303	0.00373
17.4644	0.00343	0.00205	0.00471	0.00303	0.00373
17.4803	0.00343	0.00205	0.00472	0.00304	0.00373
17.4962	0.00343	0.00205	0.00472	0.00304	0.00374
17.5121	0.00343	0.00205	0.00472	0.00304	0.00374
17.528	0.00344	0.00205	0.00472	0.00304	0.00374
17.5439	0.00344	0.00206	0.00473	0.00304	0.00374
17.5599	0.00344	0.00206	0.00473	0.00304	0.00374
17.5758	0.00344	0.00206	0.00473	0.00304	0.00374
17.5917	0.00344	0.00206	0.00473	0.00305	0.00374
17.6076	0.00344	0.00206	0.00473	0.00305	0.00374
17.6235	0.00344	0.00206	0.00474	0.00305	0.00375
17.6394	0.00345	0.00206	0.00474	0.00305	0.00375
17.6553	0.00345	0.00206	0.00474	0.00305	0.00375
17.6713	0.00345	0.00206	0.00474	0.00305	0.00375
17.6872	0.00345	0.00206	0.00474	0.00306	0.00375
17.7031	0.00345	0.00206	0.00475	0.00306	0.00375
17.719	0.00345	0.00207	0.00475	0.00306	0.00375
17.7349	0.00345	0.00207	0.00475	0.00306	0.00375
17.7508	0.00346	0.00207	0.00475	0.00306	0.00376
17.7668	0.00346	0.00207	0.00475	0.00306	0.00376
17.7827	0.00346	0.00207	0.00476	0.00306	0.00376
17.7986	0.00346	0.00207	0.00476	0.00307	0.00376
17.8145	0.00346	0.00207	0.00476	0.00307	0.00376
17.8304	0.00346	0.00207	0.00476	0.00307	0.00376
17.8463	0.00346	0.00207	0.00477	0.00307	0.00376
17.8622	0.00347	0.00207	0.00477	0.00307	0.00376
17.8782	0.00347	0.00208	0.00477	0.00307	0.00377
17.8941	0.00347	0.00208	0.00477	0.00308	0.00377
17.91	0.00347	0.00208	0.00477	0.00308	0.00377
17.9259	0.00347	0.00208	0.00478	0.00308	0.00377
17.9418	0.00347	0.00208	0.00478	0.00308	0.00377
17.9578	0.00347	0.00208	0.00478	0.00308	0.00377
17.9737	0.00348	0.00208	0.00478	0.00308	0.00377
17.9896	0.00348	0.00208	0.00478	0.00309	0.00378
18.0055	0.00348	0.00208	0.00479	0.00309	0.00378
18.0214	0.00348	0.00208	0.00479	0.00309	0.00378
18.0373	0.00348	0.00209	0.00479	0.00309	0.00378
18.0532	0.00348	0.00209	0.00479	0.00309	0.00378
18.0692	0.00348	0.00209	0.0048	0.00309	0.00378
18.0851	0.00349	0.00209	0.0048	0.00309	0.00378
18.101	0.00349	0.00209	0.0048	0.0031	0.00378
18.1169	0.00349	0.00209	0.0048	0.0031	0.00379
18.1328	0.00349	0.00209	0.0048	0.0031	0.00379
18.1487	0.00349	0.00209	0.00481	0.0031	0.00379
18.1647	0.00349	0.00209	0.00481	0.0031	0.00379
18.1806	0.00349	0.00209	0.00481	0.0031	0.00379
18.1965	0.0035	0.0021	0.00481	0.00311	0.00379
18.2124	0.0035	0.0021	0.00482	0.00311	0.00379
18.2283	0.0035	0.0021	0.00482	0.00311	0.0038
18.2442	0.0035	0.0021	0.00482	0.00311	0.0038
18.2601	0.0035	0.0021	0.00482	0.00311	0.0038
18.2761	0.0035	0.0021	0.00482	0.00311	0.0038
18.292	0.00351	0.0021	0.00483	0.00312	0.0038
18.3079	0.00351	0.0021	0.00483	0.00312	0.0038
18.3238	0.00351	0.0021	0.00483	0.00312	0.0038
18.3397	0.00351	0.00211	0.00483	0.00312	0.00381
18.3556	0.00351	0.00211	0.00484	0.00312	0.00381
18.3715	0.00351	0.00211	0.00484	0.00312	0.00381
18.3875	0.00351	0.00211	0.00484	0.00313	0.00381
18.4034	0.00352	0.00211	0.00484	0.00313	0.00381
18.4193	0.00352	0.00211	0.00484	0.00313	0.00381
18.4352	0.00352	0.00211	0.00485	0.00313	0.00381
18.4511	0.00352	0.00211	0.00485	0.00313	0.00381
18.467	0.00352	0.00211	0.00485	0.00313	0.00382
18.483	0.00352	0.00211	0.00485	0.00314	0.00382
18.4989	0.00352	0.00212	0.00486	0.00314	0.00382
18.5148	0.00353	0.00212	0.00486	0.00314	0.00382
18.5307	0.00353	0.00212	0.00486	0.00314	0.00382
18.5466	0.00353	0.00212	0.00486	0.00314	0.00382
18.5625	0.00353	0.00212	0.00486	0.00314	0.00382
18.5785	0.00353	0.00212	0.00487	0.00315	0.00383
18.5944	0.00353	0.00212	0.00487	0.00315	0.00383
18.6103	0.00354	0.00212	0.00487	0.00315	0.00383
18.6262	0.00354	0.00212	0.00487	0.00315	0.00383
18.6421	0.00354	0.00213	0.00488	0.00315	0.00383
18.658	0.00354	0.00213	0.00488	0.00315	0.00383
18.6739	0.00354	0.00213	0.00488	0.00316	0.00383
18.6899	0.00354	0.00213	0.00488	0.00316	0.00384
18.7058	0.00355	0.00213	0.00489	0.00316	0.00384
18.7217	0.00355	0.00213	0.00489	0.00316	0.00384
18.7376	0.00355	0.00213	0.00489	0.00316	0.00384
18.7535	0.00355	0.00213	0.00489	0.00316	0.00384
18.7694	0.00355	0.00213	0.00489	0.00317	0.00384
18.7854	0.00355	0.00213	0.0049	0.00317	0.00384
18.8013	0.00355	0.00214	0.0049	0.00317	0.00385
18.8172	0.00356	0.00214	0.0049	0.00317	0.00385
18.8331	0.00356	0.00214	0.0049	0.00317	0.00385
18.849	0.00356	0.00214	0.00491	0.00317	0.00385
18.8649	0.00356	0.00214	0.00491	0.00318	0.00385
18.8808	0.00356	0.00214	0.00491	0.00318	0.00385
18.8968	0.00356	0.00214	0.00491	0.00318	0.00385
18.9127	0.00357	0.00214	0.00492	0.00318	0.00386
18.9286	0.00357	0.00214	0.00492	0.00318	0.00386
18.9445	0.00357	0.00215	0.00492	0.00318	0.00386
18.9604	0.00357	0.00215	0.00492	0.00319	0.00386
18.9763	0.00357	0.00215	0.00493	0.00319	0.00386
18.9922	0.00357	0.00215	0.00493	0.00319	0.00386
19.0082	0.00358	0.00215	0.00493	0.00319	0.00386
19.0241	0.00358	0.00215	0.00493	0.00319	0.00387
19.04	0.00358	0.00215	0.00493	0.00319	0.00387
19.0559	0.00358	0.00215	0.00494	0.0032	0.00387
19.0718	0.00358	0.00215	0.00494	0.0032	0.00387
19.0877	0.00358	0.00216	0.00494	0.0032	0.00387
19.1037	0.00358	0.00216	0.00494	0.0032	0.00387
19.1196	0.00359	0.00216	0.00495	0.0032	0.00387
19.1355	0.00359	0.00216	0.00495	0.00321	0.00388
19.1514	0.00359	0.00216	0.00495	0.00321	0.00388
19.1673	0.00359	0.00216	0.00495	0.00321	0.00388
19.1832	0.00359	0.00216	0.00496	0.00321	0.00388
19.1992	0.00359	0.00216	0.00496	0.00321	0.00388
19.2151	0.0036	0.00216	0.00496	0.00321	0.00388
19.231	0.0036	0.00217	0.00496	0.00322	0.00389
19.2469	0.0036	0.00217	0.00497	0.00322	0.00389
19.2628	0.0036	0.00217	0.00497	0.00322	0.00389
19.2787	0.0036	0.00217	0.00497	0.00322	0.00389
19.2947	0.0036	0.00217	0.00497	0.00322	0.00389
19.3106	0.00361	0.00217	0.00498	0.00322	0.00389
19.3265	0.00361	0.00217	0.00498	0.00323	0.00389
19.3424	0.00361	0.00217	0.00498	0.00323	0.0039
19.3583	0.00361	0.00217	0.00498	0.00323	0.0039
19.3742	0.00361	0.00218	0.00499	0.00323	0.0039
19.3901	0.00361	0.00218	0.00499	0.00323	0.0039
19.4061	0.00362	0.00218	0.00499	0.00323	0.0039
19.422	0.00362	0.00218	0.00499	0.00324	0.0039
19.4379	0.00362	0.00218	0.00499	0.00324	0.0039
19.4538	0.00362	0.00218	0.005	0.00324	0.00391
19.4697	0.00362	0.00218	0.005	0.00324	0.00391
19.4856	0.00362	0.00218	0.005	0.00324	0.00391
19.5016	0.00363	0.00218	0.005	0.00325	0.00391
19.5175	0.00363	0.00219	0.00501	0.00325	0.00391
19.5334	0.00363	0.00219	0.00501	0.00325	0.00391
19.5493	0.00363	0.00219	0.00501	0.00325	0.00391
19.5652	0.00363	0.00219	0.00501	0.00325	0.00392
19.5811	0.00363	0.00219	0.00502	0.00325	0.00392
19.597	0.00364	0.00219	0.00502	0.00326	0.00392
19.613	0.00364	0.00219	0.00502	0.00326	0.00392
19.6289	0.00364	0.00219	0.00502	0.00326	0.00392
19.6448	0.00364	0.00219	0.00503	0.00326	0.00392
19.6607	0.00364	0.0022	0.00503	0.00326	0.00393
19.6766	0.00364	0.0022	0.00503	0.00327	0.00393
19.6925	0.00365	0.0022	0.00503	0.00327	0.00393
19.7084	0.00365	0.0022	0.00504	0.00327	0.00393
19.7244	0.00365	0.0022	0.00504	0.00327	0.00393
19.7403	0.00365	0.0022	0.00504	0.00327	0.00393
19.7562	0.00365	0.0022	0.00504	0.00327	0.00393
19.7721	0.00365	0.0022	0.00505	0.00328	0.00394
19.788	0.00366	0.00221	0.00505	0.00328	0.00394
19.8039	0.00366	0.00221	0.00505	0.00328	0.00394
19.8199	0.00366	0.00221	0.00505	0.00328	0.00394
19.8358	0.00366	0.00221	0.00506	0.00328	0.00394
19.8517	0.00366	0.00221	0.00506	0.00329	0.00394
19.8676	0.00366	0.00221	0.00506	0.00329	0.00395
19.8835	0.00367	0.00221	0.00506	0.00329	0.00395
19.8994	0.00367	0.00221	0.00507	0.00329	0.00395
19.9154	0.00367	0.00221	0.00507	0.00329	0.00395
19.9313	0.00367	0.00222	0.00507	0.0033	0.00395
19.9472	0.00367	0.00222	0.00507	0.0033	0.00395
19.9631	0.00368	0.00222	0.00508	0.0033	0.00396
19.979	0.00368	0.00222	0.00508	0.0033	0.00396
19.9949	0.00368	0.00222	0.00508	0.0033	0.00396
20.0109	0.00368	0.00222	0.00509	0.0033	0.00396
20.0268	0.00368	0.00222	0.00509	0.00331	0.00396
20.0427	0.00368	0.00222	0.00509	0.00331	0.00396
20.0586	0.00369	0.00223	0.00509	0.00331	0.00396
20.0745	0.00369	0.00223	0.0051	0.00331	0.00397
20.0904	0.00369	0.00223	0.0051	0.00331	0.00397
20.1063	0.00369	0.00223	0.0051	0.00332	0.00397
20.1223	0.00369	0.00223	0.0051	0.00332	0.00397
20.1382	0.00369	0.00223	0.00511	0.00332	0.00397
20.1541	0.0037	0.00223	0.00511	0.00332	0.00397
20.17	0.0037	0.00223	0.00511	0.00332	0.00398
20.1859	0.0037	0.00224	0.00511	0.00333	0.00398
20.2018	0.0037	0.00224	0.00512	0.00333	0.00398
20.2177	0.0037	0.00224	0.00512	0.00333	0.00398
20.2337	0.00371	0.00224	0.00512	0.00333	0.00398
20.2496	0.00371	0.00224	0.00512	0.00333	0.00398
20.2655	0.00371	0.00224	0.00513	0.00333	0.00399
20.2814	0.00371	0.00224	0.00513	0.00334	0.00399
20.2973	0.00371	0.00224	0.00513	0.00334	0.00399
20.3132	0.00371	0.00224	0.00513	0.00334	0.00399
20.3292	0.00372	0.00225	0.00514	0.00334	0.00399
20.3451	0.00372	0.00225	0.00514	0.00334	0.00399
20.361	0.00372	0.00225	0.00514	0.00335	0.00399
20.3769	0.00372	0.00225	0.00514	0.00335	0.004
20.3928	0.00372	0.00225	0.00515	0.00335	0.004
20.4087	0.00373	0.00225	0.00515	0.00335	0.004
20.4246	0.00373	0.00225	0.00515	0.00335	0.004
20.4406	0.00373	0.00225	0.00516	0.00336	0.004
20.4565	0.00373	0.00226	0.00516	0.00336	0.004
20.4724	0.00373	0.00226	0.00516	0.00336	0.00401
20.4883	0.00373	0.00226	0.00516	0.00336	0.00401
20.5042	0.00374	0.00226	0.00517	0.00336	0.00401
20.5201	0.00374	0.00226	0.00517	0.00337	0.00401
20.5361	0.00374	0.00226	0.00517	0.00337	0.00401
20.552	0.00374	0.00226	0.00517	0.00337	0.00401
20.5679	0.00374	0.00226	0.00518	0.00337	0.00402
20.5838	0.00375	0.00227	0.00518	0.00337	0.00402
20.5997	0.00375	0.00227	0.00518	0.00338	0.00402
20.6156	0.00375	0.00227	0.00519	0.00338	0.00402
20.6316	0.00375	0.00227	0.00519	0.00338	0.00402
20.6475	0.00375	0.00227	0.00519	0.00338	0.00402
20.6634	0.00375	0.00227	0.00519	0.00338	0.00403
20.6793	0.00376	0.00227	0.0052	0.00338	0.00403
20.6952	0.00376	0.00227	0.0052	0.00339	0.00403
20.7111	0.00376	0.00228	0.0052	0.00339	0.00403
20.727	0.00376	0.00228	0.0052	0.00339	0.00403
20.743	0.00376	0.00228	0.00521	0.00339	0.00403
20.7589	0.00377	0.00228	0.00521	0.00339	0.00404
20.7748	0.00377	0.00228	0.00521	0.0034	0.00404
20.7907	0.00377	0.00228	0.00521	0.0034	0.00404
20.8066	0.00377	0.00228	0.00522	0.0034	0.00404
20.8225	0.00377	0.00228	0.00522	0.0034	0.00404
20.8385	0.00378	0.00229	0.00522	0.0034	0.00404
20.8544	0.00378	0.00229	0.00523	0.00341	0.00405
20.8703	0.00378	0.00229	0.00523	0.00341	0.00405
20.8862	0.00378	0.00229	0.00523	0.00341	0.00405
20.9021	0.00378	0.00229	0.00523	0.00341	0.00405
20.918	0.00378	0.00229	0.00524	0.00341	0.00405
20.9339	0.00379	0.00229	0.00524	0.00342	0.00405
20.9499	0.00379	0.00229	0.00524	0.00342	0.00406
20.9658	0.00379	0.0023	0.00525	0.00342	0.00406
20.9817	0.00379	0.0023	0.00525	0.00342	0.00406
20.9976	0.00379	0.0023	0.00525	0.00342	0.00406
21.0135	0.0038	0.0023	0.00525	0.00343	0.00406
21.0294	0.0038	0.0023	0.00526	0.00343	0.00406
21.0453	0.0038	0.0023	0.00526	0.00343	0.00407
21.0613	0.0038	0.0023	0.00526	0.00343	0.00407
21.0772	0.0038	0.00231	0.00526	0.00344	0.00407
21.0931	0.00381	0.00231	0.00527	0.00344	0.00407
21.109	0.00381	0.00231	0.00527	0.00344	0.00407
21.1249	0.00381	0.00231	0.00527	0.00344	0.00407
21.1409	0.00381	0.00231	0.00528	0.00344	0.00408
21.1568	0.00381	0.00231	0.00528	0.00345	0.00408
21.1727	0.00382	0.00231	0.00528	0.00345	0.00408
21.1886	0.00382	0.00231	0.00528	0.00345	0.00408
21.2045	0.00382	0.00232	0.00529	0.00345	0.00408
21.2204	0.00382	0.00232	0.00529	0.00345	0.00409
21.2363	0.00382	0.00232	0.00529	0.00346	0.00409
21.2523	0.00382	0.00232	0.0053	0.00346	0.00409
21.2682	0.00383	0.00232	0.0053	0.00346	0.00409
21.2841	0.00383	0.00232	0.0053	0.00346	0.00409
21.3	0.00383	0.00232	0.0053	0.00346	0.00409
21.3159	0.00383	0.00232	0.00531	0.00347	0.0041
21.3318	0.00383	0.00233	0.00531	0.00347	0.0041
21.3478	0.00384	0.00233	0.00531	0.00347	0.0041
21.3637	0.00384	0.00233	0.00532	0.00347	0.0041
21.3796	0.00384	0.00233	0.00532	0.00347	0.0041
21.3955	0.00384	0.00233	0.00532	0.00348	0.0041
21.4114	0.00384	0.00233	0.00532	0.00348	0.00411
21.4273	0.00385	0.00233	0.00533	0.00348	0.00411
21.4432	0.00385	0.00234	0.00533	0.00348	0.00411
21.4592	0.00385	0.00234	0.00533	0.00348	0.00411
21.4751	0.00385	0.00234	0.00534	0.00349	0.00411
21.491	0.00385	0.00234	0.00534	0.00349	0.00412
21.5069	0.00386	0.00234	0.00534	0.00349	0.00412
21.5228	0.00386	0.00234	0.00534	0.00349	0.00412
21.5387	0.00386	0.00234	0.00535	0.0035	0.00412
21.5546	0.00386	0.00234	0.00535	0.0035	0.00412
21.5706	0.00386	0.00235	0.00535	0.0035	0.00412
21.5865	0.00387	0.00235	0.00536	0.0035	0.00413
21.6024	0.00387	0.00235	0.00536	0.0035	0.00413
21.6183	0.00387	0.00235	0.00536	0.00351	0.00413
21.6342	0.00387	0.00235	0.00537	0.00351	0.00413
21.6501	0.00387	0.00235	0.00537	0.00351	0.00413
21.6661	0.00388	0.00235	0.00537	0.00351	0.00413
21.682	0.00388	0.00236	0.00537	0.00351	0.00414
21.6979	0.00388	0.00236	0.00538	0.00352	0.00414
21.7138	0.00388	0.00236	0.00538	0.00352	0.00414
21.7297	0.00388	0.00236	0.00538	0.00352	0.00414
21.7456	0.00389	0.00236	0.00539	0.00352	0.00414
21.7615	0.00389	0.00236	0.00539	0.00353	0.00415
21.7775	0.00389	0.00236	0.00539	0.00353	0.00415
21.7934	0.00389	0.00237	0.00539	0.00353	0.00415
21.8093	0.00389	0.00237	0.0054	0.00353	0.00415
21.8252	0.0039	0.00237	0.0054	0.00353	0.00415
21.8411	0.0039	0.00237	0.0054	0.00354	0.00415
21.857	0.0039	0.00237	0.00541	0.00354	0.00416
21.873	0.0039	0.00237	0.00541	0.00354	0.00416
21.8889	0.00391	0.00237	0.00541	0.00354	0.00416
21.9048	0.00391	0.00237	0.00542	0.00354	0.00416
21.9207	0.00391	0.00238	0.00542	0.00355	0.00416
21.9366	0.00391	0.00238	0.00542	0.00355	0.00417
21.9525	0.00391	0.00238	0.00542	0.00355	0.00417
21.9685	0.00392	0.00238	0.00543	0.00355	0.00417
21.9844	0.00392	0.00238	0.00543	0.00356	0.00417
22.0003	0.00392	0.00238	0.00543	0.00356	0.00417
22.0162	0.00392	0.00238	0.00544	0.00356	0.00417
22.0321	0.00392	0.00239	0.00544	0.00356	0.00418
22.048	0.00393	0.00239	0.00544	0.00356	0.00418
22.0639	0.00393	0.00239	0.00545	0.00357	0.00418
22.0799	0.00393	0.00239	0.00545	0.00357	0.00418
22.0958	0.00393	0.00239	0.00545	0.00357	0.00418
22.1117	0.00393	0.00239	0.00546	0.00357	0.00419
22.1276	0.00394	0.00239	0.00546	0.00358	0.00419
22.1435	0.00394	0.0024	0.00546	0.00358	0.00419
22.1594	0.00394	0.0024	0.00546	0.00358	0.00419
22.1754	0.00394	0.0024	0.00547	0.00358	0.00419
22.1913	0.00395	0.0024	0.00547	0.00358	0.0042
22.2072	0.00395	0.0024	0.00547	0.00359	0.0042
22.2231	0.00395	0.0024	0.00548	0.00359	0.0042
22.239	0.00395	0.0024	0.00548	0.00359	0.0042
22.2549	0.00395	0.00241	0.00548	0.00359	0.0042
22.2708	0.00396	0.00241	0.00549	0.0036	0.0042
22.2868	0.00396	0.00241	0.00549	0.0036	0.00421
22.3027	0.00396	0.00241	0.00549	0.0036	0.00421
22.3186	0.00396	0.00241	0.0055	0.0036	0.00421
22.3345	0.00396	0.00241	0.0055	0.0036	0.00421
22.3504	0.00397	0.00241	0.0055	0.00361	0.00421
22.3663	0.00397	0.00242	0.0055	0.00361	0.00422
22.3822	0.00397	0.00242	0.00551	0.00361	0.00422
22.3982	0.00397	0.00242	0.00551	0.00361	0.00422
22.4141	0.00397	0.00242	0.00551	0.00362	0.00422
22.43	0.00398	0.00242	0.00552	0.00362	0.00422
22.4459	0.00398	0.00242	0.00552	0.00362	0.00423
22.4618	0.00398	0.00242	0.00552	0.00362	0.00423
22.4778	0.00398	0.00243	0.00553	0.00362	0.00423
22.4937	0.00399	0.00243	0.00553	0.00363	0.00423
22.5096	0.00399	0.00243	0.00553	0.00363	0.00423
22.5255	0.00399	0.00243	0.00554	0.00363	0.00424
22.5414	0.00399	0.00243	0.00554	0.00363	0.00424
22.5573	0.00399	0.00243	0.00554	0.00364	0.00424
22.5732	0.004	0.00243	0.00555	0.00364	0.00424
22.5892	0.004	0.00244	0.00555	0.00364	0.00424
22.6051	0.004	0.00244	0.00555	0.00364	0.00425
22.621	0.004	0.00244	0.00555	0.00365	0.00425
22.6369	0.00401	0.00244	0.00556	0.00365	0.00425
22.6528	0.00401	0.00244	0.00556	0.00365	0.00425
22.6687	0.00401	0.00244	0.00556	0.00365	0.00425
22.6847	0.00401	0.00244	0.00557	0.00365	0.00425
22.7006	0.00401	0.00245	0.00557	0.00366	0.00426
22.7165	0.00402	0.00245	0.00557	0.00366	0.00426
22.7324	0.00402	0.00245	0.00558	0.00366	0.00426
22.7483	0.00402	0.00245	0.00558	0.00366	0.00426
22.7642	0.00402	0.00245	0.00558	0.00367	0.00426
22.7801	0.00403	0.00245	0.00559	0.00367	0.00427
22.7961	0.00403	0.00245	0.00559	0.00367	0.00427
22.812	0.00403	0.00246	0.00559	0.00367	0.00427
22.8279	0.00403	0.00246	0.0056	0.00368	0.00427
22.8438	0.00403	0.00246	0.0056	0.00368	0.00427
22.8597	0.00404	0.00246	0.0056	0.00368	0.00428
22.8756	0.00404	0.00246	0.00561	0.00368	0.00428
22.8915	0.00404	0.00246	0.00561	0.00368	0.00428
22.9075	0.00404	0.00247	0.00561	0.00369	0.00428
22.9234	0.00405	0.00247	0.00562	0.00369	0.00428
22.9393	0.00405	0.00247	0.00562	0.00369	0.00429
22.9552	0.00405	0.00247	0.00562	0.00369	0.00429
22.9711	0.00405	0.00247	0.00563	0.0037	0.00429
22.987	0.00405	0.00247	0.00563	0.0037	0.00429
23.003	0.00406	0.00247	0.00563	0.0037	0.00429
23.0189	0.00406	0.00248	0.00564	0.0037	0.0043
23.0348	0.00406	0.00248	0.00564	0.00371	0.0043
23.0507	0.00406	0.00248	0.00564	0.00371	0.0043
23.0666	0.00407	0.00248	0.00565	0.00371	0.0043
23.0825	0.00407	0.00248	0.00565	0.00371	0.0043
23.0984	0.00407	0.00248	0.00565	0.00372	0.00431
23.1144	0.00407	0.00249	0.00566	0.00372	0.00431
23.1303	0.00408	0.00249	0.00566	0.00372	0.00431
23.1462	0.00408	0.00249	0.00566	0.00372	0.00431
23.1621	0.00408	0.00249	0.00567	0.00373	0.00431
23.178	0.00408	0.00249	0.00567	0.00373	0.00432
23.1939	0.00408	0.00249	0.00567	0.00373	0.00432
23.2099	0.00409	0.00249	0.00568	0.00373	0.00432
23.2258	0.00409	0.0025	0.00568	0.00374	0.00432
23.2417	0.00409	0.0025	0.00568	0.00374	0.00432
23.2576	0.00409	0.0025	0.00569	0.00374	0.00433
23.2735	0.0041	0.0025	0.00569	0.00374	0.00433
23.2894	0.0041	0.0025	0.00569	0.00374	0.00433
23.3054	0.0041	0.0025	0.0057	0.00375	0.00433
23.3213	0.0041	0.0025	0.0057	0.00375	0.00433
23.3372	0.00411	0.00251	0.0057	0.00375	0.00434
23.3531	0.00411	0.00251	0.00571	0.00375	0.00434
23.369	0.00411	0.00251	0.00571	0.00376	0.00434
23.3849	0.00411	0.00251	0.00571	0.00376	0.00434
23.4008	0.00412	0.00251	0.00572	0.00376	0.00435
23.4168	0.00412	0.00251	0.00572	0.00376	0.00435
23.4327	0.00412	0.00252	0.00572	0.00377	0.00435
23.4486	0.00412	0.00252	0.00573	0.00377	0.00435
23.4645	0.00412	0.00252	0.00573	0.00377	0.00435
23.4804	0.00413	0.00252	0.00573	0.00377	0.00436
23.4963	0.00413	0.00252	0.00574	0.00378	0.00436
23.5123	0.00413	0.00252	0.00574	0.00378	0.00436
23.5282	0.00413	0.00253	0.00574	0.00378	0.00436
23.5441	0.00414	0.00253	0.00575	0.00378	0.00436
23.56	0.00414	0.00253	0.00575	0.00379	0.00437
23.5759	0.00414	0.00253	0.00575	0.00379	0.00437
23.5918	0.00414	0.00253	0.00576	0.00379	0.00437
23.6077	0.00415	0.00253	0.00576	0.00379	0.00437
23.6237	0.00415	0.00253	0.00576	0.0038	0.00437
23.6396	0.00415	0.00254	0.00577	0.0038	0.00438
23.6555	0.00415	0.00254	0.00577	0.0038	0.00438
23.6714	0.00416	0.00254	0.00577	0.0038	0.00438
23.6873	0.00416	0.00254	0.00578	0.00381	0.00438
23.7032	0.00416	0.00254	0.00578	0.00381	0.00439
23.7192	0.00416	0.00254	0.00579	0.00381	0.00439
23.7351	0.00417	0.00255	0.00579	0.00381	0.00439
23.751	0.00417	0.00255	0.00579	0.00382	0.00439
23.7669	0.00417	0.00255	0.0058	0.00382	0.00439
23.7828	0.00417	0.00255	0.0058	0.00382	0.0044
23.7987	0.00418	0.00255	0.0058	0.00382	0.0044
23.8147	0.00418	0.00255	0.00581	0.00383	0.0044
23.8306	0.00418	0.00256	0.00581	0.00383	0.0044
23.8465	0.00418	0.00256	0.00581	0.00383	0.0044
23.8624	0.00418	0.00256	0.00582	0.00383	0.00441
23.8783	0.00419	0.00256	0.00582	0.00384	0.00441
23.8942	0.00419	0.00256	0.00582	0.00384	0.00441
23.9101	0.00419	0.00256	0.00583	0.00384	0.00441
23.9261	0.00419	0.00257	0.00583	0.00384	0.00442
23.942	0.0042	0.00257	0.00583	0.00385	0.00442
23.9579	0.0042	0.00257	0.00584	0.00385	0.00442
23.9738	0.0042	0.00257	0.00584	0.00385	0.00442
23.9897	0.0042	0.00257	0.00585	0.00385	0.00442
24.0056	0.00421	0.00257	0.00585	0.00386	0.00443
24.0216	0.00421	0.00257	0.00585	0.00386	0.00443
24.0375	0.00421	0.00258	0.00586	0.00386	0.00443
24.0534	0.00421	0.00258	0.00586	0.00387	0.00443
24.0693	0.00422	0.00258	0.00586	0.00387	0.00443
24.0852	0.00422	0.00258	0.00587	0.00387	0.00444
24.1011	0.00422	0.00258	0.00587	0.00387	0.00444
24.117	0.00422	0.00258	0.00587	0.00388	0.00444
24.133	0.00423	0.00259	0.00588	0.00388	0.00444
24.1489	0.00423	0.00259	0.00588	0.00388	0.00445
24.1648	0.00423	0.00259	0.00588	0.00388	0.00445
24.1807	0.00423	0.00259	0.00589	0.00389	0.00445
24.1966	0.00424	0.00259	0.00589	0.00389	0.00445
24.2125	0.00424	0.00259	0.0059	0.00389	0.00445
24.2284	0.00424	0.0026	0.0059	0.00389	0.00446
24.2444	0.00424	0.0026	0.0059	0.0039	0.00446
24.2603	0.00425	0.0026	0.00591	0.0039	0.00446
24.2762	0.00425	0.0026	0.00591	0.0039	0.00446
24.2921	0.00425	0.0026	0.00591	0.0039	0.00447
24.308	0.00425	0.0026	0.00592	0.00391	0.00447
24.3239	0.00426	0.00261	0.00592	0.00391	0.00447
24.3399	0.00426	0.00261	0.00593	0.00391	0.00447
24.3558	0.00426	0.00261	0.00593	0.00392	0.00447
24.3717	0.00427	0.00261	0.00593	0.00392	0.00448
24.3876	0.00427	0.00261	0.00594	0.00392	0.00448
24.4035	0.00427	0.00261	0.00594	0.00392	0.00448
24.4194	0.00427	0.00262	0.00594	0.00393	0.00448
24.4353	0.00428	0.00262	0.00595	0.00393	0.00449
24.4513	0.00428	0.00262	0.00595	0.00393	0.00449
24.4672	0.00428	0.00262	0.00595	0.00393	0.00449
24.4831	0.00428	0.00262	0.00596	0.00394	0.00449
24.499	0.00429	0.00262	0.00596	0.00394	0.00449
24.5149	0.00429	0.00263	0.00597	0.00394	0.0045
24.5309	0.00429	0.00263	0.00597	0.00394	0.0045
24.5468	0.00429	0.00263	0.00597	0.00395	0.0045
24.5627	0.0043	0.00263	0.00598	0.00395	0.0045
24.5786	0.0043	0.00263	0.00598	0.00395	0.00451
24.5945	0.0043	0.00264	0.00598	0.00396	0.00451
24.6104	0.0043	0.00264	0.00599	0.00396	0.00451
24.6263	0.00431	0.00264	0.00599	0.00396	0.00451
24.6423	0.00431	0.00264	0.006	0.00396	0.00452
24.6582	0.00431	0.00264	0.006	0.00397	0.00452
24.6741	0.00431	0.00264	0.006	0.00397	0.00452
24.69	0.00432	0.00265	0.00601	0.00397	0.00452
24.7059	0.00432	0.00265	0.00601	0.00397	0.00452
24.7218	0.00432	0.00265	0.00601	0.00398	0.00453
24.7377	0.00433	0.00265	0.00602	0.00398	0.00453
24.7537	0.00433	0.00265	0.00602	0.00398	0.00453
24.7696	0.00433	0.00265	0.00603	0.00399	0.00453
24.7855	0.00433	0.00266	0.00603	0.00399	0.00454
24.8014	0.00434	0.00266	0.00603	0.00399	0.00454
24.8173	0.00434	0.00266	0.00604	0.00399	0.00454
24.8332	0.00434	0.00266	0.00604	0.004	0.00454
24.8492	0.00434	0.00266	0.00605	0.004	0.00455
24.8651	0.00435	0.00266	0.00605	0.004	0.00455
24.881	0.00435	0.00267	0.00605	0.004	0.00455
24.8969	0.00435	0.00267	0.00606	0.00401	0.00455
24.9128	0.00435	0.00267	0.00606	0.00401	0.00455
24.9287	0.00436	0.00267	0.00606	0.00401	0.00456
24.9446	0.00436	0.00267	0.00607	0.00402	0.00456
24.9606	0.00436	0.00268	0.00607	0.00402	0.00456
24.9765	0.00437	0.00268	0.00608	0.00402	0.00456
24.9924	0.00437	0.00268	0.00608	0.00402	0.00457
25.0083	0.00437	0.00268	0.00608	0.00403	0.00457
25.0242	0.00437	0.00268	0.00609	0.00403	0.00457
25.0401	0.00438	0.00268	0.00609	0.00403	0.00457
25.0561	0.00438	0.00269	0.0061	0.00404	0.00458
25.072	0.00438	0.00269	0.0061	0.00404	0.00458
25.0879	0.00438	0.00269	0.0061	0.00404	0.00458
25.1038	0.00439	0.00269	0.00611	0.00404	0.00458
25.1197	0.00439	0.00269	0.00611	0.00405	0.00459
25.1356	0.00439	0.00269	0.00612	0.00405	0.00459
25.1516	0.0044	0.0027	0.00612	0.00405	0.00459
25.1675	0.0044	0.0027	0.00612	0.00405	0.00459
25.1834	0.0044	0.0027	0.00613	0.00406	0.00459
25.1993	0.0044	0.0027	0.00613	0.00406	0.0046
25.2152	0.00441	0.0027	0.00614	0.00406	0.0046
25.2311	0.00441	0.00271	0.00614	0.00407	0.0046
25.247	0.00441	0.00271	0.00614	0.00407	0.0046
25.263	0.00442	0.00271	0.00615	0.00407	0.00461
25.2789	0.00442	0.00271	0.00615	0.00407	0.00461
25.2948	0.00442	0.00271	0.00616	0.00408	0.00461
25.3107	0.00442	0.00271	0.00616	0.00408	0.00461
25.3266	0.00443	0.00272	0.00616	0.00408	0.00462
25.3425	0.00443	0.00272	0.00617	0.00409	0.00462
25.3585	0.00443	0.00272	0.00617	0.00409	0.00462
25.3744	0.00443	0.00272	0.00618	0.00409	0.00462
25.3903	0.00444	0.00272	0.00618	0.00409	0.00463
25.4062	0.00444	0.00273	0.00618	0.0041	0.00463
25.4221	0.00444	0.00273	0.00619	0.0041	0.00463
25.438	0.00445	0.00273	0.00619	0.0041	0.00463
25.4539	0.00445	0.00273	0.0062	0.00411	0.00464
25.4699	0.00445	0.00273	0.0062	0.00411	0.00464
25.4858	0.00445	0.00273	0.0062	0.00411	0.00464
25.5017	0.00446	0.00274	0.00621	0.00412	0.00464
25.5176	0.00446	0.00274	0.00621	0.00412	0.00465
25.5335	0.00446	0.00274	0.00622	0.00412	0.00465
25.5494	0.00447	0.00274	0.00622	0.00412	0.00465
25.5653	0.00447	0.00274	0.00622	0.00413	0.00465
25.5813	0.00447	0.00275	0.00623	0.00413	0.00466
25.5972	0.00447	0.00275	0.00623	0.00413	0.00466
25.6131	0.00448	0.00275	0.00624	0.00414	0.00466
25.629	0.00448	0.00275	0.00624	0.00414	0.00466
25.6449	0.00448	0.00275	0.00624	0.00414	0.00467
25.6608	0.00449	0.00275	0.00625	0.00414	0.00467
25.6768	0.00449	0.00276	0.00625	0.00415	0.00467
25.6927	0.00449	0.00276	0.00626	0.00415	0.00467
25.7086	0.00449	0.00276	0.00626	0.00415	0.00468
25.7245	0.0045	0.00276	0.00626	0.00416	0.00468
25.7404	0.0045	0.00276	0.00627	0.00416	0.00468
25.7563	0.0045	0.00277	0.00627	0.00416	0.00468
25.7722	0.00451	0.00277	0.00628	0.00417	0.00469
25.7882	0.00451	0.00277	0.00628	0.00417	0.00469
25.8041	0.00451	0.00277	0.00629	0.00417	0.00469
25.82	0.00452	0.00277	0.00629	0.00417	0.00469
25.8359	0.00452	0.00278	0.00629	0.00418	0.0047
25.8518	0.00452	0.00278	0.0063	0.00418	0.0047
25.8678	0.00452	0.00278	0.0063	0.00418	0.0047
25.8837	0.00453	0.00278	0.00631	0.00419	0.0047
25.8996	0.00453	0.00278	0.00631	0.00419	0.00471
25.9155	0.00453	0.00278	0.00631	0.00419	0.00471
25.9314	0.00454	0.00279	0.00632	0.0042	0.00471
25.9473	0.00454	0.00279	0.00632	0.0042	0.00471
25.9632	0.00454	0.00279	0.00633	0.0042	0.00472
25.9792	0.00454	0.00279	0.00633	0.0042	0.00472
25.9951	0.00455	0.00279	0.00634	0.00421	0.00472
26.011	0.00455	0.0028	0.00634	0.00421	0.00472
26.0269	0.00455	0.0028	0.00634	0.00421	0.00473
26.0428	0.00456	0.0028	0.00635	0.00422	0.00473
26.0587	0.00456	0.0028	0.00635	0.00422	0.00473
26.0746	0.00456	0.0028	0.00636	0.00422	0.00473
26.0906	0.00457	0.00281	0.00636	0.00423	0.00474
26.1065	0.00457	0.00281	0.00637	0.00423	0.00474
26.1224	0.00457	0.00281	0.00637	0.00423	0.00474
26.1383	0.00457	0.00281	0.00637	0.00423	0.00474
26.1542	0.00458	0.00281	0.00638	0.00424	0.00475
26.1701	0.00458	0.00282	0.00638	0.00424	0.00475
26.1861	0.00458	0.00282	0.00639	0.00424	0.00475
26.202	0.00459	0.00282	0.00639	0.00425	0.00475
26.2179	0.00459	0.00282	0.0064	0.00425	0.00476
26.2338	0.00459	0.00282	0.0064	0.00425	0.00476
26.2497	0.0046	0.00283	0.0064	0.00426	0.00476
26.2656	0.0046	0.00283	0.00641	0.00426	0.00477
26.2815	0.0046	0.00283	0.00641	0.00426	0.00477
26.2975	0.00461	0.00283	0.00642	0.00427	0.00477
26.3134	0.00461	0.00283	0.00642	0.00427	0.00477
26.3293	0.00461	0.00283	0.00643	0.00427	0.00478
26.3452	0.00461	0.00284	0.00643	0.00428	0.00478
26.3611	0.00462	0.00284	0.00644	0.00428	0.00478
26.377	0.00462	0.00284	0.00644	0.00428	0.00478
26.393	0.00462	0.00284	0.00644	0.00428	0.00479
26.4089	0.00463	0.00284	0.00645	0.00429	0.00479
26.4248	0.00463	0.00285	0.00645	0.00429	0.00479
26.4407	0.00463	0.00285	0.00646	0.00429	0.00479
26.4566	0.00464	0.00285	0.00646	0.0043	0.0048
26.4725	0.00464	0.00285	0.00647	0.0043	0.0048
26.4885	0.00464	0.00285	0.00647	0.0043	0.0048
26.5044	0.00465	0.00286	0.00647	0.00431	0.00481
26.5203	0.00465	0.00286	0.00648	0.00431	0.00481
26.5362	0.00465	0.00286	0.00648	0.00431	0.00481
26.5521	0.00465	0.00286	0.00649	0.00432	0.00481
26.568	0.00466	0.00286	0.00649	0.00432	0.00482
26.584	0.00466	0.00287	0.0065	0.00432	0.00482
26.5999	0.00466	0.00287	0.0065	0.00433	0.00482
26.6158	0.00467	0.00287	0.00651	0.00433	0.00482
26.6317	0.00467	0.00287	0.00651	0.00433	0.00483
26.6476	0.00467	0.00287	0.00651	0.00434	0.00483
26.6635	0.00468	0.00288	0.00652	0.00434	0.00483
26.6794	0.00468	0.00288	0.00652	0.00434	0.00483
26.6954	0.00468	0.00288	0.00653	0.00434	0.00484
26.7113	0.00469	0.00288	0.00653	0.00435	0.00484
26.7272	0.00469	0.00288	0.00654	0.00435	0.00484
26.7431	0.00469	0.00289	0.00654	0.00435	0.00485
26.759	0.0047	0.00289	0.00655	0.00436	0.00485
26.7749	0.0047	0.00289	0.00655	0.00436	0.00485
26.7908	0.0047	0.00289	0.00656	0.00436	0.00485
26.8068	0.00471	0.00289	0.00656	0.00437	0.00486
26.8227	0.00471	0.0029	0.00656	0.00437	0.00486
26.8386	0.00471	0.0029	0.00657	0.00437	0.00486
26.8545	0.00472	0.0029	0.00657	0.00438	0.00486
26.8704	0.00472	0.0029	0.00658	0.00438	0.00487
26.8863	0.00472	0.00291	0.00658	0.00438	0.00487
26.9022	0.00472	0.00291	0.00659	0.00439	0.00487
26.9182	0.00473	0.00291	0.00659	0.00439	0.00488
26.9341	0.00473	0.00291	0.0066	0.00439	0.00488
26.95	0.00473	0.00291	0.0066	0.0044	0.00488
26.9659	0.00474	0.00292	0.00661	0.0044	0.00488
26.9818	0.00474	0.00292	0.00661	0.0044	0.00489
26.9977	0.00474	0.00292	0.00662	0.00441	0.00489
27.0137	0.00475	0.00292	0.00662	0.00441	0.00489
27.0296	0.00475	0.00292	0.00662	0.00441	0.0049
27.0455	0.00475	0.00293	0.00663	0.00442	0.0049
27.0614	0.00476	0.00293	0.00663	0.00442	0.0049
27.0773	0.00476	0.00293	0.00664	0.00442	0.0049
27.0932	0.00476	0.00293	0.00664	0.00443	0.00491
27.1092	0.00477	0.00293	0.00665	0.00443	0.00491
27.1251	0.00477	0.00294	0.00665	0.00443	0.00491
27.141	0.00477	0.00294	0.00666	0.00444	0.00492
27.1569	0.00478	0.00294	0.00666	0.00444	0.00492
27.1728	0.00478	0.00294	0.00667	0.00444	0.00492
27.1887	0.00478	0.00294	0.00667	0.00445	0.00492
27.2047	0.00479	0.00295	0.00668	0.00445	0.00493
27.2206	0.00479	0.00295	0.00668	0.00445	0.00493
27.2365	0.00479	0.00295	0.00669	0.00446	0.00493
27.2524	0.0048	0.00295	0.00669	0.00446	0.00494
27.2683	0.0048	0.00296	0.00669	0.00446	0.00494
27.2842	0.0048	0.00296	0.0067	0.00447	0.00494
27.3001	0.00481	0.00296	0.0067	0.00447	0.00494
27.3161	0.00481	0.00296	0.00671	0.00447	0.00495
27.332	0.00481	0.00296	0.00671	0.00448	0.00495
27.3479	0.00482	0.00297	0.00672	0.00448	0.00495
27.3638	0.00482	0.00297	0.00672	0.00448	0.00496
27.3797	0.00482	0.00297	0.00673	0.00449	0.00496
27.3956	0.00483	0.00297	0.00673	0.00449	0.00496
27.4115	0.00483	0.00297	0.00674	0.00449	0.00496
27.4275	0.00483	0.00298	0.00674	0.0045	0.00497
27.4434	0.00484	0.00298	0.00675	0.0045	0.00497
27.4593	0.00484	0.00298	0.00675	0.0045	0.00497
27.4752	0.00484	0.00298	0.00676	0.00451	0.00498
27.4911	0.00485	0.00298	0.00676	0.00451	0.00498
27.507	0.00485	0.00299	0.00677	0.00451	0.00498
27.523	0.00485	0.00299	0.00677	0.00452	0.00498
27.5389	0.00486	0.00299	0.00678	0.00452	0.00499
27.5548	0.00486	0.00299	0.00678	0.00452	0.00499
27.5707	0.00487	0.003	0.00679	0.00453	0.00499
27.5866	0.00487	0.003	0.00679	0.00453	0.005
27.6025	0.00487	0.003	0.0068	0.00454	0.005
27.6184	0.00488	0.003	0.0068	0.00454	0.005
27.6344	0.00488	0.003	0.00681	0.00454	0.005
27.6503	0.00488	0.00301	0.00681	0.00455	0.00501
27.6662	0.00489	0.00301	0.00682	0.00455	0.00501
27.6821	0.00489	0.00301	0.00682	0.00455	0.00501
27.698	0.00489	0.00301	0.00683	0.00456	0.00502
27.714	0.0049	0.00302	0.00683	0.00456	0.00502
27.7299	0.0049	0.00302	0.00684	0.00456	0.00502
27.7458	0.0049	0.00302	0.00684	0.00457	0.00503
27.7617	0.00491	0.00302	0.00685	0.00457	0.00503
27.7776	0.00491	0.00302	0.00685	0.00457	0.00503
27.7935	0.00491	0.00303	0.00686	0.00458	0.00503
27.8094	0.00492	0.00303	0.00686	0.00458	0.00504
27.8254	0.00492	0.00303	0.00687	0.00458	0.00504
27.8413	0.00492	0.00303	0.00687	0.00459	0.00504
27.8572	0.00493	0.00304	0.00688	0.00459	0.00505
27.8731	0.00493	0.00304	0.00688	0.0046	0.00505
27.889	0.00494	0.00304	0.00689	0.0046	0.00505
27.9049	0.00494	0.00304	0.00689	0.0046	0.00506
27.9209	0.00494	0.00304	0.0069	0.00461	0.00506
27.9368	0.00495	0.00305	0.0069	0.00461	0.00506
27.9527	0.00495	0.00305	0.00691	0.00461	0.00506
27.9686	0.00495	0.00305	0.00691	0.00462	0.00507
27.9845	0.00496	0.00305	0.00692	0.00462	0.00507
28.0004	0.00496	0.00306	0.00692	0.00462	0.00507
28.0163	0.00496	0.00306	0.00693	0.00463	0.00508
28.0323	0.00497	0.00306	0.00693	0.00463	0.00508
28.0482	0.00497	0.00306	0.00694	0.00463	0.00508
28.0641	0.00497	0.00306	0.00694	0.00464	0.00509
28.08	0.00498	0.00307	0.00695	0.00464	0.00509
28.0959	0.00498	0.00307	0.00695	0.00465	0.00509
28.1118	0.00499	0.00307	0.00696	0.00465	0.0051
28.1277	0.00499	0.00307	0.00696	0.00465	0.0051
28.1437	0.00499	0.00308	0.00697	0.00466	0.0051
28.1596	0.005	0.00308	0.00697	0.00466	0.0051
28.1755	0.005	0.00308	0.00698	0.00466	0.00511
28.1914	0.005	0.00308	0.00698	0.00467	0.00511
28.2073	0.00501	0.00308	0.00699	0.00467	0.00511
28.2232	0.00501	0.00309	0.00699	0.00467	0.00512
28.2392	0.00501	0.00309	0.007	0.00468	0.00512
28.2551	0.00502	0.00309	0.007	0.00468	0.00512
28.271	0.00502	0.00309	0.00701	0.00469	0.00513
28.2869	0.00503	0.0031	0.00701	0.00469	0.00513
28.3028	0.00503	0.0031	0.00702	0.00469	0.00513
28.3187	0.00503	0.0031	0.00702	0.0047	0.00514
28.3346	0.00504	0.0031	0.00703	0.0047	0.00514
28.3506	0.00504	0.00311	0.00703	0.0047	0.00514
28.3665	0.00504	0.00311	0.00704	0.00471	0.00514
28.3824	0.00505	0.00311	0.00704	0.00471	0.00515
28.3983	0.00505	0.00311	0.00705	0.00472	0.00515
28.4142	0.00506	0.00311	0.00705	0.00472	0.00515
28.4301	0.00506	0.00312	0.00706	0.00472	0.00516
28.4461	0.00506	0.00312	0.00707	0.00473	0.00516
28.462	0.00507	0.00312	0.00707	0.00473	0.00516
28.4779	0.00507	0.00312	0.00708	0.00473	0.00517
28.4938	0.00507	0.00313	0.00708	0.00474	0.00517
28.5097	0.00508	0.00313	0.00709	0.00474	0.00517
28.5256	0.00508	0.00313	0.00709	0.00475	0.00518
28.5416	0.00509	0.00313	0.0071	0.00475	0.00518
28.5575	0.00509	0.00314	0.0071	0.00475	0.00518
28.5734	0.00509	0.00314	0.00711	0.00476	0.00519
28.5893	0.0051	0.00314	0.00711	0.00476	0.00519
28.6052	0.0051	0.00314	0.00712	0.00476	0.00519
28.6211	0.0051	0.00314	0.00712	0.00477	0.0052
28.637	0.00511	0.00315	0.00713	0.00477	0.0052
28.653	0.00511	0.00315	0.00713	0.00478	0.0052
28.6689	0.00512	0.00315	0.00714	0.00478	0.00521
28.6848	0.00512	0.00315	0.00715	0.00478	0.00521
28.7007	0.00512	0.00316	0.00715	0.00479	0.00521
28.7166	0.00513	0.00316	0.00716	0.00479	0.00521
28.7325	0.00513	0.00316	0.00716	0.00479	0.00522
28.7484	0.00514	0.00316	0.00717	0.0048	0.00522
28.7644	0.00514	0.00317	0.00717	0.0048	0.00522
28.7803	0.00514	0.00317	0.00718	0.00481	0.00523
28.7962	0.00515	0.00317	0.00718	0.00481	0.00523
28.8121	0.00515	0.00317	0.00719	0.00481	0.00523
28.828	0.00516	0.00318	0.00719	0.00482	0.00524
28.8439	0.00516	0.00318	0.0072	0.00482	0.00524
28.8599	0.00516	0.00318	0.0072	0.00483	0.00524
28.8758	0.00517	0.00318	0.00721	0.00483	0.00525
28.8917	0.00517	0.00319	0.00722	0.00483	0.00525
28.9076	0.00517	0.00319	0.00722	0.00484	0.00525
28.9235	0.00518	0.00319	0.00723	0.00484	0.00526
28.9394	0.00518	0.00319	0.00723	0.00484	0.00526
28.9553	0.00519	0.0032	0.00724	0.00485	0.00526
28.9713	0.00519	0.0032	0.00724	0.00485	0.00527
28.9872	0.00519	0.0032	0.00725	0.00486	0.00527
29.0031	0.0052	0.0032	0.00725	0.00486	0.00527
29.019	0.0052	0.0032	0.00726	0.00486	0.00528
29.0349	0.00521	0.00321	0.00727	0.00487	0.00528
29.0509	0.00521	0.00321	0.00727	0.00487	0.00528
29.0668	0.00521	0.00321	0.00728	0.00488	0.00529
29.0827	0.00522	0.00321	0.00728	0.00488	0.00529
29.0986	0.00522	0.00322	0.00729	0.00488	0.00529
29.1145	0.00523	0.00322	0.00729	0.00489	0.0053
29.1304	0.00523	0.00322	0.0073	0.00489	0.0053
29.1463	0.00523	0.00322	0.0073	0.0049	0.0053
29.1623	0.00524	0.00323	0.00731	0.0049	0.00531
29.1782	0.00524	0.00323	0.00732	0.0049	0.00531
29.1941	0.00525	0.00323	0.00732	0.00491	0.00531
29.21	0.00525	0.00323	0.00733	0.00491	0.00532
29.2259	0.00525	0.00324	0.00733	0.00492	0.00532
29.2418	0.00526	0.00324	0.00734	0.00492	0.00532
29.2578	0.00526	0.00324	0.00734	0.00492	0.00533
29.2737	0.00527	0.00324	0.00735	0.00493	0.00533
29.2896	0.00527	0.00325	0.00736	0.00493	0.00533
29.3055	0.00527	0.00325	0.00736	0.00494	0.00534
29.3214	0.00528	0.00325	0.00737	0.00494	0.00534
29.3373	0.00528	0.00325	0.00737	0.00494	0.00534
29.3532	0.00529	0.00326	0.00738	0.00495	0.00535
29.3692	0.00529	0.00326	0.00738	0.00495	0.00535
29.3851	0.0053	0.00326	0.00739	0.00496	0.00536
29.401	0.0053	0.00326	0.0074	0.00496	0.00536
29.4169	0.0053	0.00327	0.0074	0.00496	0.00536
29.4328	0.00531	0.00327	0.00741	0.00497	0.00537
29.4487	0.00531	0.00327	0.00741	0.00497	0.00537
29.4646	0.00532	0.00327	0.00742	0.00498	0.00537
29.4806	0.00532	0.00328	0.00742	0.00498	0.00538
29.4965	0.00532	0.00328	0.00743	0.00498	0.00538
29.5124	0.00533	0.00328	0.00744	0.00499	0.00538
29.5283	0.00533	0.00328	0.00744	0.00499	0.00539
29.5442	0.00534	0.00329	0.00745	0.005	0.00539
29.5601	0.00534	0.00329	0.00745	0.005	0.00539
29.5761	0.00535	0.00329	0.00746	0.00501	0.0054
29.592	0.00535	0.00329	0.00747	0.00501	0.0054
29.6079	0.00535	0.0033	0.00747	0.00501	0.0054
29.6238	0.00536	0.0033	0.00748	0.00502	0.00541
29.6397	0.00536	0.0033	0.00748	0.00502	0.00541
29.6556	0.00537	0.00331	0.00749	0.00503	0.00541
29.6715	0.00537	0.00331	0.0075	0.00503	0.00542
29.6875	0.00537	0.00331	0.0075	0.00503	0.00542
29.7034	0.00538	0.00331	0.00751	0.00504	0.00543
29.7193	0.00538	0.00332	0.00751	0.00504	0.00543
29.7352	0.00539	0.00332	0.00752	0.00505	0.00543
29.7511	0.00539	0.00332	0.00752	0.00505	0.00544
29.767	0.0054	0.00332	0.00753	0.00506	0.00544
29.783	0.0054	0.00333	0.00754	0.00506	0.00544
29.7989	0.0054	0.00333	0.00754	0.00506	0.00545
29.8148	0.00541	0.00333	0.00755	0.00507	0.00545
29.8307	0.00541	0.00333	0.00755	0.00507	0.00545
29.8466	0.00542	0.00334	0.00756	0.00508	0.00546
29.8625	0.00542	0.00334	0.00757	0.00508	0.00546
29.8785	0.00543	0.00334	0.00757	0.00508	0.00546
29.8944	0.00543	0.00334	0.00758	0.00509	0.00547
29.9103	0.00544	0.00335	0.00758	0.00509	0.00547
29.9262	0.00544	0.00335	0.00759	0.0051	0.00548
29.9421	0.00544	0.00335	0.0076	0.0051	0.00548
29.958	0.00545	0.00335	0.0076	0.00511	0.00548
29.9739	0.00545	0.00336	0.00761	0.00511	0.00549
29.9899	0.00546	0.00336	0.00762	0.00511	0.00549
30.0058	0.00546	0.00336	0.00762	0.00512	0.00549
30.0217	0.00547	0.00337	0.00763	0.00512	0.0055
30.0376	0.00547	0.00337	0.00763	0.00513	0.0055
30.0535	0.00547	0.00337	0.00764	0.00513	0.0055
30.0694	0.00548	0.00337	0.00765	0.00514	0.00551
30.0853	0.00548	0.00338	0.00765	0.00514	0.00551
30.1013	0.00549	0.00338	0.00766	0.00514	0.00552
30.1172	0.00549	0.00338	0.00766	0.00515	0.00552
30.1331	0.0055	0.00338	0.00767	0.00515	0.00552
30.149	0.0055	0.00339	0.00768	0.00516	0.00553
30.1649	0.00551	0.00339	0.00768	0.00516	0.00553
30.1808	0.00551	0.00339	0.00769	0.00517	0.00553
30.1968	0.00551	0.00339	0.0077	0.00517	0.00554
30.2127	0.00552	0.0034	0.0077	0.00518	0.00554
30.2286	0.00552	0.0034	0.00771	0.00518	0.00554
30.2445	0.00553	0.0034	0.00771	0.00518	0.00555
30.2604	0.00553	0.00341	0.00772	0.00519	0.00555
30.2763	0.00554	0.00341	0.00773	0.00519	0.00556
30.2923	0.00554	0.00341	0.00773	0.0052	0.00556
30.3082	0.00555	0.00341	0.00774	0.0052	0.00556
30.3241	0.00555	0.00342	0.00775	0.00521	0.00557
30.34	0.00556	0.00342	0.00775	0.00521	0.00557
30.3559	0.00556	0.00342	0.00776	0.00521	0.00557
30.3718	0.00556	0.00342	0.00776	0.00522	0.00558
30.3878	0.00557	0.00343	0.00777	0.00522	0.00558
30.4037	0.00557	0.00343	0.00778	0.00523	0.00559
30.4196	0.00558	0.00343	0.00778	0.00523	0.00559
30.4355	0.00558	0.00344	0.00779	0.00524	0.00559
30.4514	0.00559	0.00344	0.0078	0.00524	0.0056
30.4673	0.00559	0.00344	0.0078	0.00525	0.0056
30.4832	0.0056	0.00344	0.00781	0.00525	0.00561
30.4992	0.0056	0.00345	0.00782	0.00525	0.00561
30.5151	0.00561	0.00345	0.00782	0.00526	0.00561
30.531	0.00561	0.00345	0.00783	0.00526	0.00562
30.5469	0.00561	0.00345	0.00783	0.00527	0.00562
30.5628	0.00562	0.00346	0.00784	0.00527	0.00562
30.5787	0.00562	0.00346	0.00785	0.00528	0.00563
30.5947	0.00563	0.00346	0.00785	0.00528	0.00563
30.6106	0.00563	0.00347	0.00786	0.00529	0.00564
30.6265	0.00564	0.00347	0.00787	0.00529	0.00564
30.6424	0.00564	0.00347	0.00787	0.0053	0.00564
30.6583	0.00565	0.00347	0.00788	0.0053	0.00565
30.6742	0.00565	0.00348	0.00789	0.0053	0.00565
30.6901	0.00566	0.00348	0.00789	0.00531	0.00565
30.7061	0.00566	0.00348	0.0079	0.00531	0.00566
30.722	0.00567	0.00349	0.00791	0.00532	0.00566
30.7379	0.00567	0.00349	0.00791	0.00532	0.00567
30.7538	0.00568	0.00349	0.00792	0.00533	0.00567
30.7697	0.00568	0.00349	0.00793	0.00533	0.00567
30.7856	0.00569	0.0035	0.00793	0.00534	0.00568
30.8015	0.00569	0.0035	0.00794	0.00534	0.00568
30.8175	0.00569	0.0035	0.00795	0.00535	0.00569
30.8334	0.0057	0.00351	0.00795	0.00535	0.00569
30.8493	0.0057	0.00351	0.00796	0.00536	0.00569
30.8652	0.00571	0.00351	0.00797	0.00536	0.0057
30.8811	0.00571	0.00351	0.00797	0.00536	0.0057
30.897	0.00572	0.00352	0.00798	0.00537	0.00571
30.913	0.00572	0.00352	0.00799	0.00537	0.00571
30.9289	0.00573	0.00352	0.00799	0.00538	0.00571
30.9448	0.00573	0.00353	0.008	0.00538	0.00572
30.9607	0.00574	0.00353	0.00801	0.00539	0.00572
30.9766	0.00574	0.00353	0.00801	0.00539	0.00573
30.9925	0.00575	0.00353	0.00802	0.0054	0.00573
31.0084	0.00575	0.00354	0.00803	0.0054	0.00573
31.0244	0.00576	0.00354	0.00803	0.00541	0.00574
31.0403	0.00576	0.00354	0.00804	0.00541	0.00574
31.0562	0.00577	0.00355	0.00805	0.00542	0.00575
31.0721	0.00577	0.00355	0.00805	0.00542	0.00575
31.088	0.00578	0.00355	0.00806	0.00543	0.00575
31.104	0.00578	0.00355	0.00807	0.00543	0.00576
31.1199	0.00579	0.00356	0.00807	0.00544	0.00576
31.1358	0.00579	0.00356	0.00808	0.00544	0.00577
31.1517	0.0058	0.00356	0.00809	0.00544	0.00577
31.1676	0.0058	0.00357	0.00809	0.00545	0.00577
31.1835	0.00581	0.00357	0.0081	0.00545	0.00578
31.1994	0.00581	0.00357	0.00811	0.00546	0.00578
31.2154	0.00582	0.00357	0.00811	0.00546	0.00579
31.2313	0.00582	0.00358	0.00812	0.00547	0.00579
31.2472	0.00583	0.00358	0.00813	0.00547	0.00579
31.2631	0.00583	0.00358	0.00813	0.00548	0.0058
31.279	0.00584	0.00359	0.00814	0.00548	0.0058
31.2949	0.00584	0.00359	0.00815	0.00549	0.00581
31.3108	0.00585	0.00359	0.00816	0.00549	0.00581
31.3268	0.00585	0.0036	0.00816	0.0055	0.00581
31.3427	0.00586	0.0036	0.00817	0.0055	0.00582
31.3586	0.00586	0.0036	0.00818	0.00551	0.00582
31.3745	0.00587	0.0036	0.00818	0.00551	0.00583
31.3904	0.00587	0.00361	0.00819	0.00552	0.00583
31.4063	0.00588	0.00361	0.0082	0.00552	0.00584
31.4223	0.00588	0.00361	0.0082	0.00553	0.00584
31.4382	0.00589	0.00362	0.00821	0.00553	0.00584
31.4541	0.00589	0.00362	0.00822	0.00554	0.00585
31.47	0.0059	0.00362	0.00823	0.00554	0.00585
31.4859	0.0059	0.00363	0.00823	0.00555	0.00586
31.5018	0.00591	0.00363	0.00824	0.00555	0.00586
31.5177	0.00591	0.00363	0.00825	0.00556	0.00586
31.5337	0.00592	0.00363	0.00825	0.00556	0.00587
31.5496	0.00592	0.00364	0.00826	0.00557	0.00587
31.5655	0.00593	0.00364	0.00827	0.00557	0.00588
31.5814	0.00593	0.00364	0.00827	0.00558	0.00588
31.5973	0.00594	0.00365	0.00828	0.00558	0.00589
31.6132	0.00594	0.00365	0.00829	0.00559	0.00589
31.6292	0.00595	0.00365	0.0083	0.00559	0.00589
31.6451	0.00595	0.00366	0.0083	0.0056	0.0059
31.661	0.00596	0.00366	0.00831	0.0056	0.0059
31.6769	0.00596	0.00366	0.00832	0.00561	0.00591
31.6928	0.00597	0.00366	0.00832	0.00561	0.00591
31.7087	0.00598	0.00367	0.00833	0.00562	0.00592
31.7247	0.00598	0.00367	0.00834	0.00562	0.00592
31.7406	0.00599	0.00367	0.00835	0.00563	0.00592
31.7565	0.00599	0.00368	0.00835	0.00563	0.00593
31.7724	0.006	0.00368	0.00836	0.00564	0.00593
31.7883	0.006	0.00368	0.00837	0.00564	0.00594
31.8042	0.00601	0.00369	0.00838	0.00565	0.00594
31.8201	0.00601	0.00369	0.00838	0.00565	0.00595
31.8361	0.00602	0.00369	0.00839	0.00566	0.00595
31.852	0.00602	0.0037	0.0084	0.00566	0.00595
31.8679	0.00603	0.0037	0.0084	0.00567	0.00596
31.8838	0.00603	0.0037	0.00841	0.00567	0.00596
31.8997	0.00604	0.0037	0.00842	0.00568	0.00597
31.9156	0.00604	0.00371	0.00843	0.00568	0.00597
31.9316	0.00605	0.00371	0.00843	0.00569	0.00598
31.9475	0.00606	0.00371	0.00844	0.00569	0.00598
31.9634	0.00606	0.00372	0.00845	0.0057	0.00598
31.9793	0.00607	0.00372	0.00846	0.0057	0.00599
31.9952	0.00607	0.00372	0.00846	0.00571	0.00599
32.0111	0.00608	0.00373	0.00847	0.00571	0.006
32.027	0.00608	0.00373	0.00848	0.00572	0.006
32.043	0.00609	0.00373	0.00849	0.00572	0.00601
32.0589	0.00609	0.00374	0.00849	0.00573	0.00601
32.0748	0.0061	0.00374	0.0085	0.00573	0.00602
32.0907	0.0061	0.00374	0.00851	0.00574	0.00602
32.1066	0.00611	0.00375	0.00852	0.00574	0.00602
32.1225	0.00612	0.00375	0.00852	0.00575	0.00603
32.1384	0.00612	0.00375	0.00853	0.00575	0.00603
32.1544	0.00613	0.00376	0.00854	0.00576	0.00604
32.1703	0.00613	0.00376	0.00855	0.00577	0.00604
32.1862	0.00614	0.00376	0.00855	0.00577	0.00605
32.2021	0.00614	0.00376	0.00856	0.00578	0.00605
32.218	0.00615	0.00377	0.00857	0.00578	0.00606
32.234	0.00615	0.00377	0.00858	0.00579	0.00606
32.2499	0.00616	0.00377	0.00858	0.00579	0.00606
32.2658	0.00616	0.00378	0.00859	0.0058	0.00607
32.2817	0.00617	0.00378	0.0086	0.0058	0.00607
32.2976	0.00618	0.00378	0.00861	0.00581	0.00608
32.3135	0.00618	0.00379	0.00862	0.00581	0.00608
32.3294	0.00619	0.00379	0.00862	0.00582	0.00609
32.3454	0.00619	0.00379	0.00863	0.00582	0.00609
32.3613	0.0062	0.0038	0.00864	0.00583	0.0061
32.3772	0.0062	0.0038	0.00865	0.00583	0.0061
32.3931	0.00621	0.0038	0.00865	0.00584	0.00611
32.409	0.00622	0.00381	0.00866	0.00584	0.00611
32.4249	0.00622	0.00381	0.00867	0.00585	0.00611
32.4408	0.00623	0.00381	0.00868	0.00586	0.00612
32.4568	0.00623	0.00382	0.00868	0.00586	0.00612
32.4727	0.00624	0.00382	0.00869	0.00587	0.00613
32.4886	0.00624	0.00382	0.0087	0.00587	0.00613
32.5045	0.00625	0.00383	0.00871	0.00588	0.00614
32.5204	0.00626	0.00383	0.00872	0.00588	0.00614
32.5363	0.00626	0.00383	0.00872	0.00589	0.00615
32.5523	0.00627	0.00384	0.00873	0.00589	0.00615
32.5682	0.00627	0.00384	0.00874	0.0059	0.00616
32.5841	0.00628	0.00384	0.00875	0.0059	0.00616
32.6	0.00628	0.00385	0.00876	0.00591	0.00617
32.6159	0.00629	0.00385	0.00876	0.00592	0.00617
32.6318	0.0063	0.00385	0.00877	0.00592	0.00618
32.6478	0.0063	0.00386	0.00878	0.00593	0.00618
32.6637	0.00631	0.00386	0.00879	0.00593	0.00618
32.6796	0.00631	0.00386	0.0088	0.00594	0.00619
32.6955	0.00632	0.00387	0.0088	0.00594	0.00619
32.7114	0.00633	0.00387	0.00881	0.00595	0.0062
32.7273	0.00633	0.00387	0.00882	0.00595	0.0062
32.7432	0.00634	0.00388	0.00883	0.00596	0.00621
32.7592	0.00634	0.00388	0.00884	0.00597	0.00621
32.7751	0.00635	0.00388	0.00884	0.00597	0.00622
32.791	0.00635	0.00389	0.00885	0.00598	0.00622
32.8069	0.00636	0.00389	0.00886	0.00598	0.00623
32.8228	0.00637	0.00389	0.00887	0.00599	0.00623
32.8387	0.00637	0.0039	0.00888	0.00599	0.00624
32.8546	0.00638	0.0039	0.00888	0.006	0.00624
32.8706	0.00638	0.0039	0.00889	0.006	0.00625
32.8865	0.00639	0.00391	0.0089	0.00601	0.00625
32.9024	0.0064	0.00391	0.00891	0.00602	0.00626
32.9183	0.0064	0.00391	0.00892	0.00602	0.00626
32.9342	0.00641	0.00392	0.00893	0.00603	0.00627
32.9501	0.00641	0.00392	0.00893	0.00603	0.00627
32.9661	0.00642	0.00392	0.00894	0.00604	0.00628
32.982	0.00643	0.00393	0.00895	0.00604	0.00628
32.9979	0.00643	0.00393	0.00896	0.00605	0.00628
33.0138	0.00644	0.00393	0.00897	0.00606	0.00629
33.0297	0.00645	0.00394	0.00897	0.00606	0.00629
33.0456	0.00645	0.00394	0.00898	0.00607	0.0063
33.0615	0.00646	0.00394	0.00899	0.00607	0.0063
33.0775	0.00646	0.00395	0.009	0.00608	0.00631
33.0934	0.00647	0.00395	0.00901	0.00608	0.00631
33.1093	0.00648	0.00396	0.00902	0.00609	0.00632
33.1252	0.00648	0.00396	0.00902	0.0061	0.00632
33.1411	0.00649	0.00396	0.00903	0.0061	0.00633
33.157	0.00649	0.00397	0.00904	0.00611	0.00633
33.173	0.0065	0.00397	0.00905	0.00611	0.00634
33.1889	0.00651	0.00397	0.00906	0.00612	0.00634
33.2048	0.00651	0.00398	0.00907	0.00612	0.00635
33.2207	0.00652	0.00398	0.00908	0.00613	0.00635
33.2366	0.00653	0.00398	0.00908	0.00614	0.00636
33.2525	0.00653	0.00399	0.00909	0.00614	0.00636
33.2685	0.00654	0.00399	0.0091	0.00615	0.00637
33.2844	0.00654	0.00399	0.00911	0.00615	0.00637
33.3003	0.00655	0.004	0.00912	0.00616	0.00638
33.3162	0.00656	0.004	0.00913	0.00617	0.00638
33.3321	0.00656	0.004	0.00913	0.00617	0.00639
33.348	0.00657	0.00401	0.00914	0.00618	0.00639
33.364	0.00658	0.00401	0.00915	0.00618	0.0064
33.3799	0.00658	0.00402	0.00916	0.00619	0.0064
33.3958	0.00659	0.00402	0.00917	0.0062	0.00641
33.4117	0.00659	0.00402	0.00918	0.0062	0.00641
33.4276	0.0066	0.00403	0.00919	0.00621	0.00642
33.4435	0.00661	0.00403	0.0092	0.00621	0.00642
33.4594	0.00661	0.00403	0.0092	0.00622	0.00643
33.4753	0.00662	0.00404	0.00921	0.00623	0.00643
33.4913	0.00663	0.00404	0.00922	0.00623	0.00644
33.5072	0.00663	0.00404	0.00923	0.00624	0.00644
33.5231	0.00664	0.00405	0.00924	0.00624	0.00645
33.539	0.00665	0.00405	0.00925	0.00625	0.00645
33.5549	0.00665	0.00405	0.00926	0.00626	0.00646
33.5709	0.00666	0.00406	0.00926	0.00626	0.00646
33.5868	0.00667	0.00406	0.00927	0.00627	0.00647
33.6027	0.00667	0.00407	0.00928	0.00627	0.00648
33.6186	0.00668	0.00407	0.00929	0.00628	0.00648
33.6345	0.00668	0.00407	0.0093	0.00629	0.00649
33.6504	0.00669	0.00408	0.00931	0.00629	0.00649
33.6663	0.0067	0.00408	0.00932	0.0063	0.0065
33.6823	0.0067	0.00408	0.00933	0.0063	0.0065
33.6982	0.00671	0.00409	0.00934	0.00631	0.00651
33.7141	0.00672	0.00409	0.00934	0.00632	0.00651
33.73	0.00672	0.00409	0.00935	0.00632	0.00652
33.7459	0.00673	0.0041	0.00936	0.00633	0.00652
33.7618	0.00674	0.0041	0.00937	0.00633	0.00653
33.7777	0.00674	0.00411	0.00938	0.00634	0.00653
33.7937	0.00675	0.00411	0.00939	0.00635	0.00654
33.8096	0.00676	0.00411	0.0094	0.00635	0.00654
33.8255	0.00676	0.00412	0.00941	0.00636	0.00655
33.8414	0.00677	0.00412	0.00942	0.00637	0.00655
33.8573	0.00678	0.00412	0.00943	0.00637	0.00656
33.8732	0.00678	0.00413	0.00943	0.00638	0.00656
33.8892	0.00679	0.00413	0.00944	0.00638	0.00657
33.9051	0.0068	0.00414	0.00945	0.00639	0.00657
33.921	0.0068	0.00414	0.00946	0.0064	0.00658
33.9369	0.00681	0.00414	0.00947	0.0064	0.00659
33.9528	0.00682	0.00415	0.00948	0.00641	0.00659
33.9687	0.00683	0.00415	0.00949	0.00642	0.0066
33.9847	0.00683	0.00415	0.0095	0.00642	0.0066
34.0006	0.00684	0.00416	0.00951	0.00643	0.00661
34.0165	0.00685	0.00416	0.00952	0.00643	0.00661
34.0324	0.00685	0.00417	0.00953	0.00644	0.00662
34.0483	0.00686	0.00417	0.00954	0.00645	0.00662
34.0642	0.00687	0.00417	0.00955	0.00645	0.00663
34.0801	0.00687	0.00418	0.00955	0.00646	0.00663
34.0961	0.00688	0.00418	0.00956	0.00647	0.00664
34.112	0.00689	0.00418	0.00957	0.00647	0.00665
34.1279	0.00689	0.00419	0.00958	0.00648	0.00665
34.1438	0.0069	0.00419	0.00959	0.00649	0.00666
34.1597	0.00691	0.0042	0.0096	0.00649	0.00666
34.1756	0.00691	0.0042	0.00961	0.0065	0.00667
34.1915	0.00692	0.0042	0.00962	0.0065	0.00667
34.2075	0.00693	0.00421	0.00963	0.00651	0.00668
34.2234	0.00694	0.00421	0.00964	0.00652	0.00668
34.2393	0.00694	0.00422	0.00965	0.00652	0.00669
34.2552	0.00695	0.00422	0.00966	0.00653	0.00669
34.2711	0.00696	0.00422	0.00967	0.00654	0.0067
34.287	0.00696	0.00423	0.00968	0.00654	0.00671
34.303	0.00697	0.00423	0.00969	0.00655	0.00671
34.3189	0.00698	0.00423	0.0097	0.00656	0.00672
34.3348	0.00699	0.00424	0.00971	0.00656	0.00672
34.3507	0.00699	0.00424	0.00972	0.00657	0.00673
34.3666	0.007	0.00425	0.00972	0.00658	0.00673
34.3825	0.00701	0.00425	0.00973	0.00658	0.00674
34.3984	0.00701	0.00425	0.00974	0.00659	0.00674
34.4144	0.00702	0.00426	0.00975	0.0066	0.00675
34.4303	0.00703	0.00426	0.00976	0.0066	0.00676
34.4462	0.00704	0.00427	0.00977	0.00661	0.00676
34.4621	0.00704	0.00427	0.00978	0.00662	0.00677
34.478	0.00705	0.00427	0.00979	0.00662	0.00677
34.4939	0.00706	0.00428	0.0098	0.00663	0.00678
34.5099	0.00706	0.00428	0.00981	0.00664	0.00678
34.5258	0.00707	0.00429	0.00982	0.00664	0.00679
34.5417	0.00708	0.00429	0.00983	0.00665	0.0068
34.5576	0.00709	0.00429	0.00984	0.00666	0.0068
34.5735	0.00709	0.0043	0.00985	0.00666	0.00681
34.5894	0.0071	0.0043	0.00986	0.00667	0.00681
34.6054	0.00711	0.00431	0.00987	0.00668	0.00682
34.6213	0.00712	0.00431	0.00988	0.00668	0.00682
34.6372	0.00712	0.00431	0.00989	0.00669	0.00683
34.6531	0.00713	0.00432	0.0099	0.0067	0.00684
34.669	0.00714	0.00432	0.00991	0.0067	0.00684
34.6849	0.00715	0.00433	0.00992	0.00671	0.00685
34.7009	0.00715	0.00433	0.00993	0.00672	0.00685
34.7168	0.00716	0.00433	0.00994	0.00672	0.00686
34.7327	0.00717	0.00434	0.00995	0.00673	0.00686
34.7486	0.00718	0.00434	0.00996	0.00674	0.00687
34.7645	0.00718	0.00435	0.00997	0.00674	0.00688
34.7804	0.00719	0.00435	0.00998	0.00675	0.00688
34.7963	0.0072	0.00435	0.00999	0.00676	0.00689
34.8123	0.00721	0.00436	0.01	0.00676	0.00689
34.8282	0.00721	0.00436	0.01001	0.00677	0.0069
34.8441	0.00722	0.00437	0.01002	0.00678	0.00691
34.86	0.00723	0.00437	0.01003	0.00679	0.00691
34.8759	0.00724	0.00437	0.01004	0.00679	0.00692
34.8918	0.00724	0.00438	0.01005	0.0068	0.00692
34.9078	0.00725	0.00438	0.01006	0.00681	0.00693
34.9237	0.00726	0.00439	0.01007	0.00681	0.00694
34.9396	0.00727	0.00439	0.01008	0.00682	0.00694
34.9555	0.00727	0.0044	0.01009	0.00683	0.00695
34.9714	0.00728	0.0044	0.0101	0.00683	0.00695
34.9873	0.00729	0.0044	0.01011	0.00684	0.00696
35.0032	0.0073	0.00441	0.01012	0.00685	0.00697
35.0192	0.0073	0.00441	0.01013	0.00686	0.00697
35.0351	0.00731	0.00442	0.01014	0.00686	0.00698
35.051	0.00732	0.00442	0.01016	0.00687	0.00698
35.0669	0.00733	0.00442	0.01017	0.00688	0.00699
35.0828	0.00734	0.00443	0.01018	0.00688	0.007
35.0987	0.00734	0.00443	0.01019	0.00689	0.007
35.1146	0.00735	0.00444	0.0102	0.0069	0.00701
35.1306	0.00736	0.00444	0.01021	0.0069	0.00701
35.1465	0.00737	0.00445	0.01022	0.00691	0.00702
35.1624	0.00738	0.00445	0.01023	0.00692	0.00703
35.1783	0.00738	0.00445	0.01024	0.00693	0.00703
35.1942	0.00739	0.00446	0.01025	0.00693	0.00704
35.2101	0.0074	0.00446	0.01026	0.00694	0.00704
35.2261	0.00741	0.00447	0.01027	0.00695	0.00705
35.242	0.00742	0.00447	0.01028	0.00696	0.00706
35.2579	0.00742	0.00448	0.01029	0.00696	0.00706
35.2738	0.00743	0.00448	0.0103	0.00697	0.00707
35.2897	0.00744	0.00448	0.01031	0.00698	0.00708
35.3056	0.00745	0.00449	0.01032	0.00698	0.00708
35.3216	0.00746	0.00449	0.01033	0.00699	0.00709
35.3375	0.00746	0.0045	0.01035	0.007	0.00709
35.3534	0.00747	0.0045	0.01036	0.00701	0.0071
35.3693	0.00748	0.00451	0.01037	0.00701	0.00711
35.3852	0.00749	0.00451	0.01038	0.00702	0.00711
35.4011	0.0075	0.00451	0.01039	0.00703	0.00712
35.417	0.0075	0.00452	0.0104	0.00704	0.00713
35.433	0.00751	0.00452	0.01041	0.00704	0.00713
35.4489	0.00752	0.00453	0.01042	0.00705	0.00714
35.4648	0.00753	0.00453	0.01043	0.00706	0.00714
35.4807	0.00754	0.00454	0.01044	0.00706	0.00715
35.4966	0.00754	0.00454	0.01045	0.00707	0.00716
35.5125	0.00755	0.00454	0.01047	0.00708	0.00716
35.5284	0.00756	0.00455	0.01048	0.00709	0.00717
35.5444	0.00757	0.00455	0.01049	0.00709	0.00718
35.5603	0.00758	0.00456	0.0105	0.0071	0.00718
35.5762	0.00759	0.00456	0.01051	0.00711	0.00719
35.5921	0.00759	0.00457	0.01052	0.00712	0.00719
35.608	0.0076	0.00457	0.01053	0.00712	0.0072
35.624	0.00761	0.00458	0.01054	0.00713	0.00721
35.6399	0.00762	0.00458	0.01055	0.00714	0.00721
35.6558	0.00763	0.00458	0.01057	0.00715	0.00722
35.6717	0.00764	0.00459	0.01058	0.00715	0.00723
35.6876	0.00765	0.00459	0.01059	0.00716	0.00723
35.7035	0.00765	0.0046	0.0106	0.00717	0.00724
35.7194	0.00766	0.0046	0.01061	0.00718	0.00725
35.7353	0.00767	0.00461	0.01062	0.00719	0.00725
35.7513	0.00768	0.00461	0.01063	0.00719	0.00726
35.7672	0.00769	0.00462	0.01064	0.0072	0.00727
35.7831	0.0077	0.00462	0.01066	0.00721	0.00727
35.799	0.0077	0.00462	0.01067	0.00722	0.00728
35.8149	0.00771	0.00463	0.01068	0.00722	0.00729
35.8308	0.00772	0.00463	0.01069	0.00723	0.00729
35.8468	0.00773	0.00464	0.0107	0.00724	0.0073
35.8627	0.00774	0.00464	0.01071	0.00725	0.00731
35.8786	0.00775	0.00465	0.01072	0.00725	0.00731
35.8945	0.00776	0.00465	0.01074	0.00726	0.00732
35.9104	0.00777	0.00466	0.01075	0.00727	0.00733
35.9263	0.00777	0.00466	0.01076	0.00728	0.00733
35.9423	0.00778	0.00467	0.01077	0.00729	0.00734
35.9582	0.00779	0.00467	0.01078	0.00729	0.00735
35.9741	0.0078	0.00467	0.01079	0.0073	0.00735
35.99	0.00781	0.00468	0.01081	0.00731	0.00736
36.0059	0.00782	0.00468	0.01082	0.00732	0.00737
36.0218	0.00783	0.00469	0.01083	0.00732	0.00737
36.0378	0.00784	0.00469	0.01084	0.00733	0.00738
36.0537	0.00784	0.0047	0.01085	0.00734	0.00739
36.0696	0.00785	0.0047	0.01086	0.00735	0.00739
36.0855	0.00786	0.00471	0.01088	0.00736	0.0074
36.1014	0.00787	0.00471	0.01089	0.00736	0.00741
36.1173	0.00788	0.00472	0.0109	0.00737	0.00741
36.1332	0.00789	0.00472	0.01091	0.00738	0.00742
36.1492	0.0079	0.00473	0.01092	0.00739	0.00743
36.1651	0.00791	0.00473	0.01093	0.0074	0.00743
36.181	0.00792	0.00473	0.01095	0.0074	0.00744
36.1969	0.00793	0.00474	0.01096	0.00741	0.00745
36.2128	0.00793	0.00474	0.01097	0.00742	0.00745
36.2287	0.00794	0.00475	0.01098	0.00743	0.00746
36.2447	0.00795	0.00475	0.01099	0.00744	0.00747
36.2606	0.00796	0.00476	0.01101	0.00744	0.00747
36.2765	0.00797	0.00476	0.01102	0.00745	0.00748
36.2924	0.00798	0.00477	0.01103	0.00746	0.00749
36.3083	0.00799	0.00477	0.01104	0.00747	0.0075
36.3242	0.008	0.00478	0.01106	0.00748	0.0075
36.3401	0.00801	0.00478	0.01107	0.00748	0.00751
36.3561	0.00802	0.00479	0.01108	0.00749	0.00752
36.372	0.00803	0.00479	0.01109	0.0075	0.00752
36.3879	0.00804	0.0048	0.0111	0.00751	0.00753
36.4038	0.00804	0.0048	0.01112	0.00752	0.00754
36.4197	0.00805	0.00481	0.01113	0.00753	0.00754
36.4356	0.00806	0.00481	0.01114	0.00753	0.00755
36.4515	0.00807	0.00482	0.01115	0.00754	0.00756
36.4675	0.00808	0.00482	0.01117	0.00755	0.00757
36.4834	0.00809	0.00482	0.01118	0.00756	0.00757
36.4993	0.0081	0.00483	0.01119	0.00757	0.00758
36.5152	0.00811	0.00483	0.0112	0.00758	0.00759
36.5311	0.00812	0.00484	0.01122	0.00758	0.00759
36.547	0.00813	0.00484	0.01123	0.00759	0.0076
36.563	0.00814	0.00485	0.01124	0.0076	0.00761
36.5789	0.00815	0.00485	0.01125	0.00761	0.00762
36.5948	0.00816	0.00486	0.01127	0.00762	0.00762
36.6107	0.00817	0.00486	0.01128	0.00763	0.00763
36.6266	0.00818	0.00487	0.01129	0.00763	0.00764
36.6425	0.00819	0.00487	0.0113	0.00764	0.00764
36.6585	0.0082	0.00488	0.01132	0.00765	0.00765
36.6744	0.00821	0.00488	0.01133	0.00766	0.00766
36.6903	0.00822	0.00489	0.01134	0.00767	0.00767
36.7062	0.00823	0.00489	0.01135	0.00768	0.00767
36.7221	0.00824	0.0049	0.01137	0.00769	0.00768
36.738	0.00825	0.0049	0.01138	0.00769	0.00769
36.754	0.00826	0.00491	0.01139	0.0077	0.0077
36.7699	0.00826	0.00491	0.01141	0.00771	0.0077
36.7858	0.00827	0.00492	0.01142	0.00772	0.00771
36.8017	0.00828	0.00492	0.01143	0.00773	0.00772
36.8176	0.00829	0.00493	0.01144	0.00774	0.00773
36.8335	0.0083	0.00493	0.01146	0.00775	0.00773
36.8494	0.00831	0.00494	0.01147	0.00775	0.00774
36.8653	0.00832	0.00494	0.01148	0.00776	0.00775
36.8813	0.00833	0.00495	0.0115	0.00777	0.00775
36.8972	0.00834	0.00495	0.01151	0.00778	0.00776
36.9131	0.00835	0.00496	0.01152	0.00779	0.00777
36.929	0.00836	0.00496	0.01154	0.0078	0.00778
36.9449	0.00837	0.00497	0.01155	0.00781	0.00778
36.9609	0.00838	0.00497	0.01156	0.00782	0.00779
36.9768	0.00839	0.00498	0.01158	0.00782	0.0078
36.9927	0.0084	0.00498	0.01159	0.00783	0.00781
37.0086	0.00841	0.00499	0.0116	0.00784	0.00781
37.0245	0.00842	0.00499	0.01162	0.00785	0.00782
37.0404	0.00843	0.005	0.01163	0.00786	0.00783
37.0563	0.00845	0.005	0.01164	0.00787	0.00784
37.0723	0.00846	0.00501	0.01166	0.00788	0.00785
37.0882	0.00847	0.00501	0.01167	0.00789	0.00785
37.1041	0.00848	0.00502	0.01168	0.0079	0.00786
37.12	0.00849	0.00502	0.0117	0.0079	0.00787
37.1359	0.0085	0.00503	0.01171	0.00791	0.00788
37.1518	0.00851	0.00503	0.01172	0.00792	0.00788
37.1677	0.00852	0.00504	0.01174	0.00793	0.00789
37.1837	0.00853	0.00504	0.01175	0.00794	0.0079
37.1996	0.00854	0.00505	0.01176	0.00795	0.00791
37.2155	0.00855	0.00506	0.01178	0.00796	0.00791
37.2314	0.00856	0.00506	0.01179	0.00797	0.00792
37.2473	0.00857	0.00507	0.0118	0.00798	0.00793
37.2632	0.00858	0.00507	0.01182	0.00799	0.00794
37.2792	0.00859	0.00508	0.01183	0.00799	0.00795
37.2951	0.0086	0.00508	0.01185	0.008	0.00795
37.311	0.00861	0.00509	0.01186	0.00801	0.00796
37.3269	0.00862	0.00509	0.01187	0.00802	0.00797
37.3428	0.00863	0.0051	0.01189	0.00803	0.00798
37.3587	0.00864	0.0051	0.0119	0.00804	0.00798
37.3747	0.00865	0.00511	0.01192	0.00805	0.00799
37.3906	0.00866	0.00511	0.01193	0.00806	0.008
37.4065	0.00868	0.00512	0.01194	0.00807	0.00801
37.4224	0.00869	0.00512	0.01196	0.00808	0.00802
37.4383	0.0087	0.00513	0.01197	0.00809	0.00802
37.4542	0.00871	0.00513	0.01199	0.0081	0.00803
37.4701	0.00872	0.00514	0.012	0.00811	0.00804
37.4861	0.00873	0.00514	0.01201	0.00812	0.00805
37.502	0.00874	0.00515	0.01203	0.00812	0.00806
37.5179	0.00875	0.00516	0.01204	0.00813	0.00806
37.5338	0.00876	0.00516	0.01206	0.00814	0.00807
37.5497	0.00877	0.00517	0.01207	0.00815	0.00808
37.5656	0.00878	0.00517	0.01208	0.00816	0.00809
37.5816	0.0088	0.00518	0.0121	0.00817	0.0081
37.5975	0.00881	0.00518	0.01211	0.00818	0.00811
37.6134	0.00882	0.00519	0.01213	0.00819	0.00811
37.6293	0.00883	0.00519	0.01214	0.0082	0.00812
37.6452	0.00884	0.0052	0.01216	0.00821	0.00813
37.6611	0.00885	0.0052	0.01217	0.00822	0.00814
37.677	0.00886	0.00521	0.01219	0.00823	0.00815
37.693	0.00887	0.00522	0.0122	0.00824	0.00815
37.7089	0.00888	0.00522	0.01221	0.00825	0.00816
37.7248	0.0089	0.00523	0.01223	0.00826	0.00817
37.7407	0.00891	0.00523	0.01224	0.00827	0.00818
37.7566	0.00892	0.00524	0.01226	0.00828	0.00819
37.7725	0.00893	0.00524	0.01227	0.00829	0.0082
37.7884	0.00894	0.00525	0.01229	0.0083	0.0082
37.8044	0.00895	0.00525	0.0123	0.00831	0.00821
37.8203	0.00896	0.00526	0.01232	0.00832	0.00822
37.8362	0.00898	0.00527	0.01233	0.00833	0.00823
37.8521	0.00899	0.00527	0.01235	0.00834	0.00824
37.868	0.009	0.00528	0.01236	0.00835	0.00825
37.8839	0.00901	0.00528	0.01238	0.00836	0.00825
37.8999	0.00902	0.00529	0.01239	0.00837	0.00826
37.9158	0.00903	0.00529	0.01241	0.00837	0.00827
37.9317	0.00904	0.0053	0.01242	0.00838	0.00828
37.9476	0.00906	0.0053	0.01244	0.00839	0.00829
37.9635	0.00907	0.00531	0.01245	0.0084	0.0083
37.9794	0.00908	0.00532	0.01247	0.00841	0.00831
37.9954	0.00909	0.00532	0.01248	0.00842	0.00831
38.0113	0.0091	0.00533	0.0125	0.00843	0.00832
38.0272	0.00912	0.00533	0.01251	0.00844	0.00833
38.0431	0.00913	0.00534	0.01253	0.00845	0.00834
38.059	0.00914	0.00534	0.01254	0.00846	0.00835
38.0749	0.00915	0.00535	0.01256	0.00847	0.00836
38.0909	0.00916	0.00536	0.01257	0.00848	0.00837
38.1068	0.00917	0.00536	0.01259	0.0085	0.00837
38.1227	0.00919	0.00537	0.01261	0.00851	0.00838
38.1386	0.0092	0.00537	0.01262	0.00852	0.00839
38.1545	0.00921	0.00538	0.01264	0.00853	0.0084
38.1704	0.00922	0.00538	0.01265	0.00854	0.00841
38.1863	0.00923	0.00539	0.01267	0.00855	0.00842
38.2023	0.00925	0.0054	0.01268	0.00856	0.00843
38.2182	0.00926	0.0054	0.0127	0.00857	0.00844
38.2341	0.00927	0.00541	0.01271	0.00858	0.00844
38.25	0.00928	0.00541	0.01273	0.00859	0.00845
38.2659	0.0093	0.00542	0.01275	0.0086	0.00846
38.2818	0.00931	0.00542	0.01276	0.00861	0.00847
38.2978	0.00932	0.00543	0.01278	0.00862	0.00848
38.3137	0.00933	0.00544	0.01279	0.00863	0.00849
38.3296	0.00934	0.00544	0.01281	0.00864	0.0085
38.3455	0.00936	0.00545	0.01283	0.00865	0.00851
38.3614	0.00937	0.00545	0.01284	0.00866	0.00852
38.3773	0.00938	0.00546	0.01286	0.00867	0.00852
38.3932	0.00939	0.00547	0.01287	0.00868	0.00853
38.4092	0.00941	0.00547	0.01289	0.00869	0.00854
38.4251	0.00942	0.00548	0.01291	0.0087	0.00855
38.441	0.00943	0.00548	0.01292	0.00871	0.00856
38.4569	0.00944	0.00549	0.01294	0.00872	0.00857
38.4728	0.00946	0.0055	0.01295	0.00873	0.00858
38.4887	0.00947	0.0055	0.01297	0.00874	0.00859
38.5046	0.00948	0.00551	0.01299	0.00875	0.0086
38.5206	0.0095	0.00551	0.013	0.00877	0.00861
38.5365	0.00951	0.00552	0.01302	0.00878	0.00862
38.5524	0.00952	0.00553	0.01304	0.00879	0.00862
38.5683	0.00953	0.00553	0.01305	0.0088	0.00863
38.5842	0.00955	0.00554	0.01307	0.00881	0.00864
38.6001	0.00956	0.00554	0.01309	0.00882	0.00865
38.6161	0.00957	0.00555	0.0131	0.00883	0.00866
38.632	0.00959	0.00556	0.01312	0.00884	0.00867
38.6479	0.0096	0.00556	0.01314	0.00885	0.00868
38.6638	0.00961	0.00557	0.01315	0.00886	0.00869
38.6797	0.00962	0.00557	0.01317	0.00887	0.0087
38.6956	0.00964	0.00558	0.01319	0.00888	0.00871
38.7116	0.00965	0.00559	0.0132	0.0089	0.00872
38.7275	0.00966	0.00559	0.01322	0.00891	0.00873
38.7434	0.00968	0.0056	0.01324	0.00892	0.00874
38.7593	0.00969	0.00561	0.01325	0.00893	0.00875
38.7752	0.0097	0.00561	0.01327	0.00894	0.00876
38.7911	0.00972	0.00562	0.01329	0.00895	0.00876
38.807	0.00973	0.00562	0.0133	0.00896	0.00877
38.823	0.00974	0.00563	0.01332	0.00897	0.00878
38.8389	0.00976	0.00564	0.01334	0.00898	0.00879
38.8548	0.00977	0.00564	0.01336	0.009	0.0088
38.8707	0.00978	0.00565	0.01337	0.00901	0.00881
38.8866	0.0098	0.00565	0.01339	0.00902	0.00882
38.9025	0.00981	0.00566	0.01341	0.00903	0.00883
38.9184	0.00982	0.00567	0.01343	0.00904	0.00884
38.9344	0.00984	0.00567	0.01344	0.00905	0.00885
38.9503	0.00985	0.00568	0.01346	0.00906	0.00886
38.9662	0.00987	0.00569	0.01348	0.00907	0.00887
38.9821	0.00988	0.00569	0.0135	0.00909	0.00888
38.998	0.00989	0.0057	0.01351	0.0091	0.00889
39.014	0.00991	0.00571	0.01353	0.00911	0.0089
39.0299	0.00992	0.00571	0.01355	0.00912	0.00891
39.0458	0.00993	0.00572	0.01357	0.00913	0.00892
39.0617	0.00995	0.00572	0.01358	0.00914	0.00893
39.0776	0.00996	0.00573	0.0136	0.00915	0.00894
39.0935	0.00998	0.00574	0.01362	0.00917	0.00895
39.1094	0.00999	0.00574	0.01364	0.00918	0.00896
39.1253	0.01	0.00575	0.01365	0.00919	0.00897
39.1413	0.01002	0.00576	0.01367	0.0092	0.00898
39.1572	0.01003	0.00576	0.01369	0.00921	0.00899
39.1731	0.01005	0.00577	0.01371	0.00922	0.009
39.189	0.01006	0.00578	0.01373	0.00924	0.00901
39.2049	0.01008	0.00578	0.01374	0.00925	0.00902
39.2208	0.01009	0.00579	0.01376	0.00926	0.00903
39.2368	0.0101	0.0058	0.01378	0.00927	0.00904
39.2527	0.01012	0.0058	0.0138	0.00928	0.00905
39.2686	0.01013	0.00581	0.01382	0.00929	0.00906
39.2845	0.01015	0.00582	0.01384	0.00931	0.00907
39.3004	0.01016	0.00582	0.01385	0.00932	0.00908
39.3163	0.01018	0.00583	0.01387	0.00933	0.00909
39.3323	0.01019	0.00583	0.01389	0.00934	0.0091
39.3482	0.01021	0.00584	0.01391	0.00935	0.00911
39.3641	0.01022	0.00585	0.01393	0.00937	0.00912
39.38	0.01023	0.00585	0.01395	0.00938	0.00913
39.3959	0.01025	0.00586	0.01397	0.00939	0.00914
39.4118	0.01026	0.00587	0.01398	0.0094	0.00915
39.4278	0.01028	0.00587	0.014	0.00941	0.00916
39.4437	0.01029	0.00588	0.01402	0.00943	0.00917
39.4596	0.01031	0.00589	0.01404	0.00944	0.00918
39.4755	0.01032	0.00589	0.01406	0.00945	0.00919
39.4914	0.01034	0.0059	0.01408	0.00946	0.0092
39.5073	0.01035	0.00591	0.0141	0.00947	0.00921
39.5232	0.01037	0.00591	0.01412	0.00949	0.00922
39.5392	0.01038	0.00592	0.01414	0.0095	0.00924
39.5551	0.0104	0.00593	0.01415	0.00951	0.00925
39.571	0.01041	0.00594	0.01417	0.00952	0.00926
39.5869	0.01043	0.00594	0.01419	0.00954	0.00927
39.6028	0.01044	0.00595	0.01421	0.00955	0.00928
39.6187	0.01046	0.00596	0.01423	0.00956	0.00929
39.6347	0.01047	0.00596	0.01425	0.00957	0.0093
39.6506	0.01049	0.00597	0.01427	0.00959	0.00931
39.6665	0.01051	0.00598	0.01429	0.0096	0.00932
39.6824	0.01052	0.00598	0.01431	0.00961	0.00933
39.6983	0.01054	0.00599	0.01433	0.00962	0.00934
39.7142	0.01055	0.006	0.01435	0.00964	0.00935
39.7301	0.01057	0.006	0.01437	0.00965	0.00936
39.7461	0.01058	0.00601	0.01439	0.00966	0.00937
39.762	0.0106	0.00602	0.01441	0.00967	0.00938
39.7779	0.01061	0.00602	0.01443	0.00969	0.0094
39.7938	0.01063	0.00603	0.01445	0.0097	0.00941
39.8097	0.01065	0.00604	0.01447	0.00971	0.00942
39.8256	0.01066	0.00605	0.01449	0.00972	0.00943
39.8415	0.01068	0.00605	0.01451	0.00974	0.00944
39.8575	0.01069	0.00606	0.01453	0.00975	0.00945
39.8734	0.01071	0.00607	0.01455	0.00976	0.00946
39.8893	0.01073	0.00607	0.01457	0.00978	0.00947
39.9052	0.01074	0.00608	0.01459	0.00979	0.00948
39.9211	0.01076	0.00609	0.01461	0.0098	0.00949
39.937	0.01077	0.00609	0.01463	0.00981	0.00951
39.953	0.01079	0.0061	0.01465	0.00983	0.00952
39.9689	0.01081	0.00611	0.01467	0.00984	0.00953
39.9848	0.01082	0.00612	0.01469	0.00985	0.00954
40.0007	0.01084	0.00612	0.01471	0.00987	0.00955
40.0166	0.01086	0.00613	0.01473	0.00988	0.00956
40.0325	0.01087	0.00614	0.01475	0.00989	0.00957
40.0485	0.01089	0.00614	0.01477	0.00991	0.00958
40.0644	0.0109	0.00615	0.01479	0.00992	0.0096
40.0803	0.01092	0.00616	0.01481	0.00993	0.00961
40.0962	0.01094	0.00617	0.01483	0.00995	0.00962
40.1121	0.01095	0.00617	0.01486	0.00996	0.00963
40.128	0.01097	0.00618	0.01488	0.00997	0.00964
40.1439	0.01099	0.00619	0.0149	0.00999	0.00965
40.1599	0.011	0.00619	0.01492	0.01	0.00966
40.1758	0.01102	0.0062	0.01494	0.01001	0.00968
40.1917	0.01104	0.00621	0.01496	0.01003	0.00969
40.2076	0.01106	0.00622	0.01498	0.01004	0.0097
40.2235	0.01107	0.00622	0.015	0.01005	0.00971
40.2394	0.01109	0.00623	0.01503	0.01007	0.00972
40.2553	0.01111	0.00624	0.01505	0.01008	0.00973
40.2713	0.01112	0.00625	0.01507	0.01009	0.00975
40.2872	0.01114	0.00625	0.01509	0.01011	0.00976
40.3031	0.01116	0.00626	0.01511	0.01012	0.00977
40.319	0.01118	0.00627	0.01513	0.01013	0.00978
40.3349	0.01119	0.00628	0.01515	0.01015	0.00979
40.3509	0.01121	0.00628	0.01518	0.01016	0.0098
40.3668	0.01123	0.00629	0.0152	0.01018	0.00982
40.3827	0.01125	0.0063	0.01522	0.01019	0.00983
40.3986	0.01126	0.00631	0.01524	0.0102	0.00984
40.4145	0.01128	0.00631	0.01526	0.01022	0.00985
40.4304	0.0113	0.00632	0.01529	0.01023	0.00986
40.4463	0.01132	0.00633	0.01531	0.01025	0.00988
40.4623	0.01133	0.00634	0.01533	0.01026	0.00989
40.4782	0.01135	0.00634	0.01535	0.01027	0.0099
40.4941	0.01137	0.00635	0.01537	0.01029	0.00991
40.51	0.01139	0.00636	0.0154	0.0103	0.00992
40.5259	0.01141	0.00637	0.01542	0.01032	0.00994
40.5418	0.01142	0.00637	0.01544	0.01033	0.00995
40.5577	0.01144	0.00638	0.01546	0.01034	0.00996
40.5737	0.01146	0.00639	0.01549	0.01036	0.00997
40.5896	0.01148	0.0064	0.01551	0.01037	0.00999
40.6055	0.0115	0.0064	0.01553	0.01039	0.01
40.6214	0.01151	0.00641	0.01556	0.0104	0.01001
40.6373	0.01153	0.00642	0.01558	0.01042	0.01002
40.6532	0.01155	0.00643	0.0156	0.01043	0.01004
40.6692	0.01157	0.00644	0.01562	0.01044	0.01005
40.6851	0.01159	0.00644	0.01565	0.01046	0.01006
40.701	0.01161	0.00645	0.01567	0.01047	0.01007
40.7169	0.01163	0.00646	0.01569	0.01049	0.01008
40.7328	0.01164	0.00647	0.01572	0.0105	0.0101
40.7487	0.01166	0.00647	0.01574	0.01052	0.01011
40.7647	0.01168	0.00648	0.01576	0.01053	0.01012
40.7806	0.0117	0.00649	0.01579	0.01055	0.01014
40.7965	0.01172	0.0065	0.01581	0.01056	0.01015
40.8124	0.01174	0.00651	0.01583	0.01058	0.01016
40.8283	0.01176	0.00651	0.01586	0.01059	0.01017
40.8442	0.01178	0.00652	0.01588	0.01061	0.01019
40.8601	0.0118	0.00653	0.0159	0.01062	0.0102
40.8761	0.01181	0.00654	0.01593	0.01064	0.01021
40.892	0.01183	0.00655	0.01595	0.01065	0.01022
40.9079	0.01185	0.00655	0.01598	0.01067	0.01024
40.9238	0.01187	0.00656	0.016	0.01068	0.01025
40.9397	0.01189	0.00657	0.01602	0.0107	0.01026
40.9556	0.01191	0.00658	0.01605	0.01071	0.01028
40.9716	0.01193	0.00659	0.01607	0.01073	0.01029
40.9875	0.01195	0.00659	0.0161	0.01074	0.0103
41.0034	0.01197	0.0066	0.01612	0.01076	0.01032
41.0193	0.01199	0.00661	0.01615	0.01077	0.01033
41.0352	0.01201	0.00662	0.01617	0.01079	0.01034
41.0511	0.01203	0.00663	0.0162	0.0108	0.01035
41.067	0.01205	0.00663	0.01622	0.01082	0.01037
41.083	0.01207	0.00664	0.01624	0.01083	0.01038
41.0989	0.01209	0.00665	0.01627	0.01085	0.01039
41.1148	0.01211	0.00666	0.01629	0.01086	0.01041
41.1307	0.01213	0.00667	0.01632	0.01088	0.01042
41.1466	0.01215	0.00668	0.01634	0.01089	0.01043
41.1625	0.01217	0.00668	0.01637	0.01091	0.01045
41.1784	0.01219	0.00669	0.01639	0.01093	0.01046
41.1944	0.01221	0.0067	0.01642	0.01094	0.01047
41.2103	0.01223	0.00671	0.01644	0.01096	0.01049
41.2262	0.01225	0.00672	0.01647	0.01097	0.0105
41.2421	0.01227	0.00672	0.0165	0.01099	0.01052
41.258	0.01229	0.00673	0.01652	0.011	0.01053
41.2739	0.01231	0.00674	0.01655	0.01102	0.01054
41.2899	0.01234	0.00675	0.01657	0.01104	0.01056
41.3058	0.01236	0.00676	0.0166	0.01105	0.01057
41.3217	0.01238	0.00677	0.01662	0.01107	0.01058
41.3376	0.0124	0.00678	0.01665	0.01108	0.0106
41.3535	0.01242	0.00678	0.01668	0.0111	0.01061
41.3694	0.01244	0.00679	0.0167	0.01112	0.01063
41.3854	0.01246	0.0068	0.01673	0.01113	0.01064
41.4013	0.01248	0.00681	0.01675	0.01115	0.01065
41.4172	0.0125	0.00682	0.01678	0.01116	0.01067
41.4331	0.01253	0.00683	0.01681	0.01118	0.01068
41.449	0.01255	0.00683	0.01683	0.0112	0.01069
41.4649	0.01257	0.00684	0.01686	0.01121	0.01071
41.4808	0.01259	0.00685	0.01689	0.01123	0.01072
41.4968	0.01261	0.00686	0.01691	0.01125	0.01074
41.5127	0.01263	0.00687	0.01694	0.01126	0.01075
41.5286	0.01266	0.00688	0.01697	0.01128	0.01077
41.5445	0.01268	0.00689	0.01699	0.0113	0.01078
41.5604	0.0127	0.0069	0.01702	0.01131	0.01079
41.5763	0.01272	0.0069	0.01705	0.01133	0.01081
41.5923	0.01274	0.00691	0.01707	0.01135	0.01082
41.6082	0.01277	0.00692	0.0171	0.01136	0.01084
41.6241	0.01279	0.00693	0.01713	0.01138	0.01085
41.64	0.01281	0.00694	0.01716	0.0114	0.01087
41.6559	0.01283	0.00695	0.01718	0.01141	0.01088
41.6718	0.01286	0.00696	0.01721	0.01143	0.0109
41.6878	0.01288	0.00697	0.01724	0.01145	0.01091
41.7037	0.0129	0.00697	0.01727	0.01146	0.01092
41.7196	0.01292	0.00698	0.01729	0.01148	0.01094
41.7355	0.01295	0.00699	0.01732	0.0115	0.01095
41.7514	0.01297	0.007	0.01735	0.01152	0.01097
41.7673	0.01299	0.00701	0.01738	0.01153	0.01098
[truncated: 3,030 more rows]
